# Supplementary material for: The first intermolecular interrupted imino-Nazarov reaction: expeditious access to carbocyclic nucleoside analogues
Source: Royal Society of Chemistry journal article supplement (doi:10.1039/c5sc03559g), 2015-10-27
Supplement: c5sc03559g1.pdf [file c5sc03559g1.pdf]

## Supporting Information

| Table of Contents                                                                      | Page |
|----------------------------------------------------------------------------------------|------|
| General Information                                                                    | S2   |
| Preparation of Dienal <b>1b</b> ( <b>1b'</b> ), <b>1c</b> and <b>1d</b>                | S3   |
| General Procedure for Preparation of <i>O,O</i> -Bis(trimethylsilyl)uracil Derivatives | S8   |
| Representative Procedure for Silylated Pyrimidine Interrupted Imino-Nazarov            | S9   |
| Procedure for Synthesis of Diaminocyclopentane <b>7</b>                                | S9   |
| Characterization Data of <b>4a-4s</b>                                                  | S11  |
| Characterization Data of <b>7</b>                                                      | S22  |
| <sup>1</sup> H, <sup>13</sup> C and 2D (COSY and NOESY) NMR Spectra                    | S23  |
| Computational Section                                                                  | S58  |

## General Information

Unless otherwise noted, all reactions were carried out in oven-dried glassware equipped with a magnetic stir bar under positive pressure of nitrogen. Anhydrous solvents were purchased from commercial suppliers and used without prior distillation with the exception of tetrahydrofuran (THF) which were distilled in the presence of sodium benzophenoneketyl. Analytical thin layer chromatography performed on Merck 60 F254 precoated silica gel (0.2 mm thickness). TLC plate visualization was achieved through irradiation with UV light at 254 nm and/or by staining the plate with either ceric ammonium molybdate solution or basic solution of potassium permanganate. Purification by flash column chromatography was carried out using silica gel 60 (0.010–0.063 mm) with eluents as noted in experimental data section for respective compounds. High Resolution Mass Spectroscopy (HRMS) spectra were recorded on a Waters Q-ToF premier™ mass Spectrometer. Proton and carbon NMR spectra were recorded at room temperature on Bruker DPX 400, and Bruker AMX 500 nuclear magnetic spectrometers. Chemical shifts for  $^1\text{H}$  NMR spectra are reported as  $\delta$  in units of parts per million (ppm) with reference to residual solvent peak of acetonitrile ( $\delta$  7.26, singlet) or methanol ( $\delta$  3.34, singlet) and coupling constant ( $J$ ) are reported in Hz. Multiplicities are reported as follows: s (singlet); brs (broad singlet); d (doublet); t (triplet); q (quartet); dd (doublet of doublet); ddd (doublet of doublet of doublet); dt (doublet of triplet); m (multiplet) and etc. Proton-decoupled carbon nuclear magnetic resonance spectra ( $^{13}\text{C}$  NMR) are reported as  $\delta$  in units of parts per million as referenced to residual solvent peaks (acetonitrile:  $\delta$  1.79 and  $\delta$  118.26; methanol:  $\delta$  49.86). 4,6-dimethoxyhexa-2,4-dienal **1a** was prepared from glycol following literature reported procedure.<sup>1</sup> *N*-benzyl aniline derivatives **2a**, **2e** and **2f** were prepared via condensation of corresponding benzaldehyde and primary aniline followed by  $\text{NaBH}_4$  reduction in methanol.<sup>1</sup> Secondary aniline **2b**,<sup>2</sup> **2c**,<sup>3</sup> and **2d**<sup>4</sup> were prepared following reported procedures.

## Preparation of dienal 1b (1b'), 1c and 1d

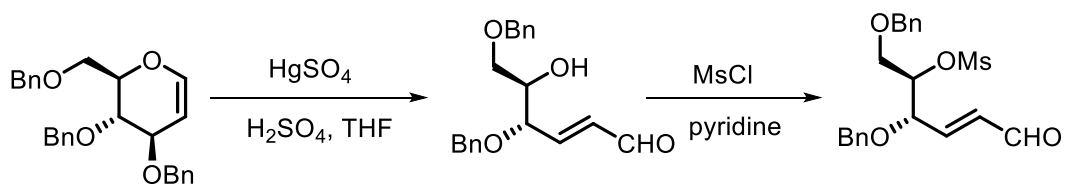

### (2R,3S,E)-1,3-bis(benzyloxy)-6-oxohex-4-en-2-yl methanesulfonate:

To a solution of 3,4,6-tri-*O*-benzyl glucal (10.8g, 0.026 mol, 1 equiv) in THF (110 mL) was added 0.02N H<sub>2</sub>SO<sub>4</sub> (220 mL) and catalytic amount of HgSO<sub>4</sub> (0.73 g, 266 mmol, 0.1 equiv). The reaction mixture was stirred at room temperature for 10 hours. Upon completion of the reaction, the reaction mixture was neutralized with excess barium carbonate and the resulting suspension was passed through a pad of Celite. The filtrate was extracted with CH<sub>2</sub>Cl<sub>2</sub> (3 × 100 mL) and the combined organic layers was washed with brine (50 mL) and water (50 mL) successively, dried over Na<sub>2</sub>SO<sub>4</sub> and evaporated under reduced pressure to give a colourless crude residue. Pyridine (50 mL) was added to the crude residue followed by MsCl (5.93 g, 0.052 mol, 2 equiv). The reaction mixture was stirred at ambient temperature for 30 min. The reaction mixture was diluted with ethyl acetate (200 mL) and washed with saturated aq. CuSO<sub>4</sub> solution until the blue CuSO<sub>4</sub> solution added stopped from turning into purple. The organic layer was then washed with water (2 × 50 mL), followed by brine (50 mL), dried over Na<sub>2</sub>SO<sub>4</sub> and evaporated under reduced pressure. The crude residue was purified by flash column chromatography on silica gel (hexane/EtOAc 2:1) to afford mesylated enal (7.67 g, 73%) as colourless solid: <sup>1</sup>H NMR (CDCl<sub>3</sub>, 400 MHz): δ 9.61 (d, *J* = 8.0 Hz, 1H), 7.34-7.45(m, 10H), 7.25 (d, *J* = 15.2 Hz, 1H), 6.67 (dd, *J* = 15.6, 8.0 Hz, 1H), 5.41 (t, *J* = 7.6 Hz, 1H), 4.93 (s, 2H), 4.59 (s, 2H), 4.28 (d, *J* = 7.6 Hz, 2H); <sup>13</sup>C NMR (CDCl<sub>3</sub>, 100 MHz): δ 192.7, 150.2, 137.1, 136.7, 134.9, 128.6, 128.5, 128.3, 128.2, 128.0, 127.9, 81.2, 77.2, 73.6, 72.3, 68.1, 38.7; HRMS (ESI): *m/z* [M+H]<sup>+</sup> calcd for C<sub>21</sub>H<sub>25</sub>O<sub>6</sub>S 405.1372, found 405.1372.

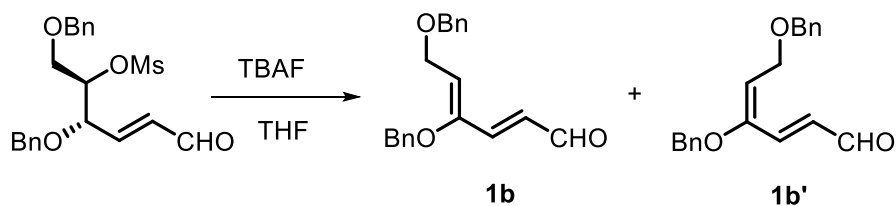

To a solution of mesylated benzyl-protected Perlin aldehyde (4.04 g, 0.010 mol, 1 equiv) in THF (50 mL) was added 1M TBAF in THF (20 mL, 0.020 mol, 2 equiv). The reaction mixture was stirred at room temperature. Upon completion of the reaction as monitored by TLC, the reaction was quenched by addition of water (50 mL). The resulting mixture was extracted with ethyl acetate ( $3 \times 100$  mL). The combined organic layers was washed with brine (50 mL), dried over Na<sub>2</sub>SO<sub>4</sub> and evaporated under reduced pressure. The crude residue was purified by flash column chromatography on silica gel (hexane/EtOAc 4:1) to afford dienal (1.43 g, 88%) as mixture of 2E,4Z **1b** and 2E,4E **1b'** isomers in a 3:2 ratio.

**(2E,4Z)-4,6-bis(benzyloxy)hexa-2,4-dienal (1b):**

<sup>1</sup>H NMR (CDCl<sub>3</sub>, 400 MHz): δ 9.67 (d, *J* = 7.6 Hz, 1H), 7.33-7.41 (m, 10H), 6.95 (dd, *J* = 16.0, 5.6 Hz, 1H), 6.42 (dd, *J* = 15.6, 8.0 Hz, 1H), 5.80 (t, *J* = 6.8 Hz, 1H), 4.79 (s, 2H), 4.49 (s, 2H), 4.16 (d, *J* = 6.8 Hz, 2H); <sup>13</sup>C NMR (CDCl<sub>3</sub>, 100 MHz): δ 193.2, 153.1, 147.5, 137.8, 136.4, 129.1, 128.6, 128.5, 128.2, 127.9, 127.8, 127.0, 126.2, 74.7, 72.8, 64.6; HRMS (ESI): *m/z* [M+H]<sup>+</sup> calcd for C<sub>20</sub>H<sub>21</sub>O<sub>3</sub> 309.1491, found 309.1491.

**(2E,4E)-4,6-bis(benzyloxy)hexa-2,4-dienal (1b'):**

<sup>1</sup>H NMR (CDCl<sub>3</sub>, 400 MHz): δ 9.61 (d, *J* = 7.6 Hz, 1H), 7.28-7.39 (m, 10H), 6.75 (dd, *J* = 16.0, 5.6 Hz, 1H), 6.35 (dd, *J* = 16.0, 8.0 Hz, 1H), 4.96 (dd, *J* = 10.8, 8.0 Hz, 1H), 4.64 (d, *J* = 11.6 Hz, 1H), 4.53-4.56 (m, 3H), 4.43-4.46 (m, 1H), 3.77 (dd, *J* = 10.8, 2.8 Hz, 1H), 3.67 (dd, *J* = 10.8, 4.8 Hz, 1H), 3.03 (s, 3H); <sup>13</sup>C NMR (CDCl<sub>3</sub>, 100 MHz): δ 193.7, 153.0, 141.7, 137.9, 136.3, 130.0, 128.6, 128.5, 128.2, 128.1, 128.0, 127.9, 127.3, 107.4, 72.1, 69.5, 64.4; HRMS (ESI): *m/z* [M+H]<sup>+</sup> calcd for C<sub>20</sub>H<sub>21</sub>O<sub>3</sub> 309.1491, found 309.1491.

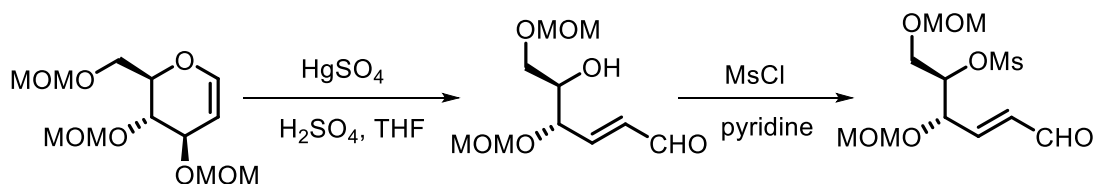

**(5S,6R)-5-((E)-3-oxoprop-1-enyl)-2,4,8,10-tetraoxaundecan-6-yl methanesulfonate:**

To a solution of 3,4,6-tri-*O*-methoxymethyl glucal (7.23 g, 0.026 mol, 1 equiv) in THF (110 mL) was added 0.02N H<sub>2</sub>SO<sub>4</sub> (220 mL) and catalytic amount of HgSO<sub>4</sub> (0.73 g, 266 mmol, 0.1 equiv). The reaction mixture was stirred at room temperature for 10 hours. Upon completion of the reaction, the reaction mixture was neutralized with excess barium carbonate and the resulting suspension was passed through a pad of Celite. The filtrate was extracted with CH<sub>2</sub>Cl<sub>2</sub> (3 × 100 mL) and the combined organic layers was washed with brine (50 mL) and water (50 mL) successively, dried over Na<sub>2</sub>SO<sub>4</sub> and evaporated under reduced pressure to give a colourless crude residue. Pyridine (50 mL) was added to the crude residue followed by MsCl (5.93 g, 0.052 mol, 2 equiv). The reaction mixture was stirred at ambient temperature for 30 min. The reaction mixture was diluted with ethyl acetate (200 mL) and washed with saturated aq. CuSO<sub>4</sub> solution until the blue CuSO<sub>4</sub> solution added stopped from turning into purple. The organic layer was then washed with water (2 × 50 mL), followed by brine (50 mL), dried over Na<sub>2</sub>SO<sub>4</sub> and evaporated under reduced pressure. The crude residue was purified by flash column chromatography on silica gel (hexane/EtOAc 3:1) to afford mesylated enal (4.21 g, 52%) as colourless solid: <sup>1</sup>H NMR (CDCl<sub>3</sub>, 500 MHz): δ 9.64 (dd, *J* = 7.6, 1.2 Hz, 1H), 6.77 (dd, *J* = 16.0, 6.0 Hz, 1H), 6.37 (dd, *J* = 15.6, 5.6 Hz, 1H), 4.90-4.94 (m, 1H), 4.65-4.72 (m, 5H), 3.41-3.82 (m, 2H), 3.39 (s, 3H), 3.38 (s, 3H), 3.12 (s, 3H); <sup>13</sup>C NMR (CDCl<sub>3</sub>, 125 MHz): δ 192.6, 149.7, 34.8, 96.8, 95.3, 81.3, 74.5, 65.7, 56.2, 55.7, 38.7; HRMS (ESI): *m/z* [M+H]<sup>+</sup> calcd for C<sub>11</sub>H<sub>21</sub>O<sub>8</sub>S 313.0957, found 313.0958.

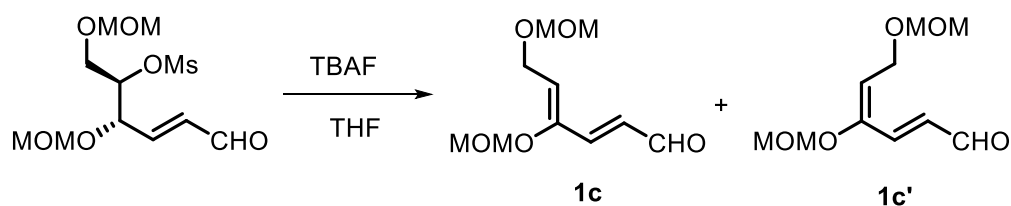

To a solution of mesylated MOM-protected Perlin aldehyde (3.12 g, 0.010 mol, 1 equiv) in THF (50 mL) was added 1M TBAF in THF (20 mL, 0.020 mol, 2 equiv). The reaction mixture was stirred at room temperature. Upon completion of the reaction as monitored by TLC, the reaction was quenched by addition of water (50 mL). The resulting mixture was extracted with ethyl acetate (3 × 100 mL). The combined organic layers was washed with brine (50 mL), dried over Na<sub>2</sub>SO<sub>4</sub> and evaporated under reduced pressure. The crude residue was purified by flash column chromatography on silica gel (hexane/EtOAc 5:1) to afford dienal (1.87 g, 80%) as mixture of 2E,4Z **1c** and 2E,4E **1c'** isomers in a 4:3 ratio

**(2E,4Z)-4,6-bis(methoxymethoxy)hexa-2,4-dienal (**1c**):**

<sup>1</sup>H NMR (CDCl<sub>3</sub>, 400 MHz): δ 9.62-9.65 (m, 1H), 6.95 (d, *J*= 15.6 Hz, 1H), 6.37 (dd, *J*= 15.2, 7.6 Hz, 1H), 5.75 (t, *J*= 6.4 Hz, 1H), 4.89 (s, 2H), 4.67 (s, 2H), 4.34 (d, *J*= 6.4 Hz, 2H), 3.55 (s, 3H), 3.40 (s, 3H); <sup>13</sup>C NMR (CDCl<sub>3</sub>, 100 MHz): δ 193.1, 152.0, 147.9, 129.1, 125.4, 98.1, 96.2, 62.2, 57.4, 55.4; HRMS (ESI): *m/z* [M+H]<sup>+</sup> calcd for C<sub>10</sub>H<sub>17</sub>O<sub>5</sub> 217.1076, found 217.1076.

**(2E,4E)-4,6-bis(methoxymethoxy)hexa-2,4-dienal (**1c'**):**

<sup>1</sup>H NMR (CDCl<sub>3</sub>, 400 MHz): δ 9.71 (d, *J*= 8.0 Hz, 1H), 7.33 (dd, *J*= 15.5, 6.0 Hz, 1H), 6.59 (dd, *J*= 15.0, 8.0 Hz, 1H), 5.60 (t, *J*= 8.0 Hz, 1H), 5.09 (s, 2H), 4.69 (s, 2H), 4.31 (d, *J*= 8.0 Hz, 2H), 3.47 (s, 3H), 3.42 (s, 3H); <sup>13</sup>C NMR (CDCl<sub>3</sub>, 100 MHz): δ 193.6, 151.7, 141.4, 129.9, 110.4, 95.4, 94.1, 61.7, 56.3, 55.5; HRMS (ESI): *m/z* [M+H]<sup>+</sup> calcd for C<sub>10</sub>H<sub>17</sub>O<sub>5</sub> 217.1076, found 217.1076.

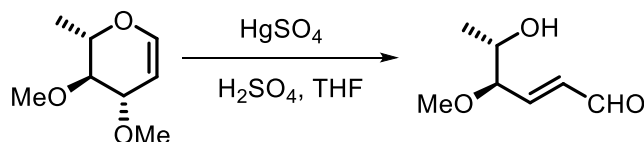

**(4R,5S,E)-5-hydroxy-4-methoxyhex-2-enal:**

To a solution of 3,4,6-tri-*O*-benzyl glucal (410 mg, 2.6 mmol, 1 equiv) in THF (11 mL) was added 0.02N H<sub>2</sub>SO<sub>4</sub> (22 mL) and catalytic amount of HgSO<sub>4</sub> (73 mg, 2.6 mmol, 0.1 equiv). The reaction mixture was stirred at room temperature for 10 hours. Upon completion of the reaction, the reaction

mixture was neutralized with excess barium carbonate and the resulting suspension was passed through a pad of Celite. The filtrate was extracted with CH<sub>2</sub>Cl<sub>2</sub> (3 × 10 mL) and the combined organic layers was washed with brine (5 mL) and water (5 mL) successively, dried over Na<sub>2</sub>SO<sub>4</sub> and evaporated under reduced pressure to give a colourless crude residue. The crude residue was purified by flash column chromatography on silica gel (hexane/EtOAc 1:2) to afford hydroxyl enal (258 mg, 69%) as colourless liquid: <sup>1</sup>H NMR (CDCl<sub>3</sub>, 500 MHz): δ 9.61 (d, *J* = 7.5 Hz, 1H), 6.78 (dd, *J* = 16.0, 6.5 Hz, 1H), 6.30 (ddd, *J* = 16.0, 8.0, 1.0 Hz, 1H), 3.99-4.02 (m, 1H), 3.39 (s, 3H), 2.48 (d, *J* = 5.0 Hz, 1H), 1.16 (d, *J* = 6.5 Hz, 3H); <sup>13</sup>C NMR (CDCl<sub>3</sub>, 125 MHz): δ 193.1, 152.5, 134.7, 84.5, 68.9, 57.7, 18.0; HRMS (ESI): *m/z* [M+H]<sup>+</sup> calcd for C<sub>7</sub>H<sub>13</sub>O<sub>3</sub> 145.0865, found 145.0863.

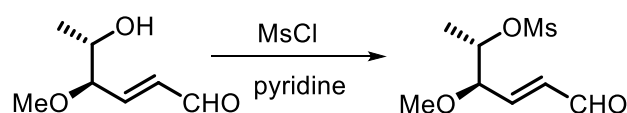

**(2S,3R,E)-3-methoxy-6-oxohex-4-en-2-yl methanesulfonate:**

To a solution of Perlin aldehyde **7** (172 mg, 1.2 mmol, 1 equiv) in pyridine (2 mL) was added MsCl (185 μL, 2.4 mmol, 2 equiv). The reaction mixture was stirred at ambient temperature for 30 min. The reaction mixture was diluted with ethyl acetate (20 mL) and washed with saturated aq. CuSO<sub>4</sub> solution until the blue CuSO<sub>4</sub> solution added stopped from turning into purple. The organic layer was then washed with water (2 × 5 mL), followed by brine (5 mL), dried over Na<sub>2</sub>SO<sub>4</sub> and evaporated under reduced pressure. The crude residue was purified by flash column chromatography on silica gel (hexane/EtOAc 2:1) to afford mesylated enal (266 mg, 98%) as colourless solid: <sup>1</sup>H NMR (CDCl<sub>3</sub>, 500 MHz): δ 9.64 (d, *J* = 7.5 Hz, 1H), 6.71 (dd, *J* = 16.0, 6.5 Hz, 1H), 6.35 (ddd, *J* = 16.0, 8.0, 1.0 Hz, 1H), 4.91-4.96 (m, 1H), 3.98 (ddd, *J* = 6.5, 3.5, 1.0 Hz, 1H), 3.42 (s, 3H), 3.07 (s, 3H), 1.39 (d, *J* = 6.5 Hz, 3H); <sup>13</sup>C NMR (CDCl<sub>3</sub>, 125 MHz): δ 192.7, 149.7, 135.5, 82.5, 79.0, 58.0, 38.7, 17.0; HRMS (ESI): *m/z* [M+H]<sup>+</sup> calcd for C<sub>8</sub>H<sub>15</sub>O<sub>5</sub>S 223.0640, found 223.0640.

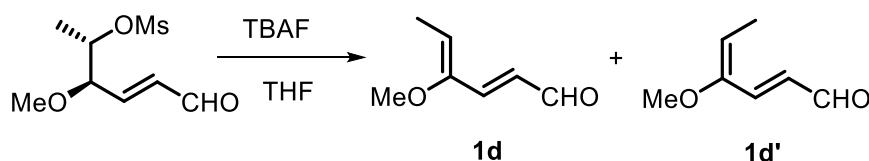

To a solution of mesyl-protected Perlin aldehyde **8** (222 mg, 1.0 mmol, 1 equiv) in THF (5 mL) was added 1M TBAF in THF (2 mL, 2.0 mol, 2 equiv). The reaction mixture was stirred at room temperature. Upon completion of the reaction as monitored by TLC, the reaction was quenched by addition of water (5 mL). The resulting mixture was extracted with ethyl acetate (3 × 10 mL). The combined organic layers was washed with brine (5 mL), dried over Na<sub>2</sub>SO<sub>4</sub> and evaporated under reduced pressure. The crude residue was purified by flash column chromatography on silica gel (hexane/EtOAc 4:1) to afford dienal (113 mg, 90%) as mixture of 2E,4Z **1d** and 2E,4E **1d'** isomers in a 5:4 ratio.

**(2E,4Z)-4-methoxyhexa-2,4-dienal (1d):**

<sup>1</sup>H NMR (CDCl<sub>3</sub>, 400 MHz): δ 9.61 (d, *J*= 8.4 Hz, 1H), 6.86 (d, *J*= 15.6 Hz, 1H), 6.29 (dd, *J*= 15.6, 8.0 Hz, 1H), 5.64 (dd, *J*= 15.6, 7.2 Hz, 1H), 3.65 (s, 3H), 1.86 (d, *J*= 7.6 Hz, 3H); <sup>13</sup>C NMR (CDCl<sub>3</sub>, 100 MHz): δ 193.5, 154.5, 148.4, 126.9, 125.8, 59.7, 12.0; HRMS (ESI): *m/z* [M+H]<sup>+</sup> calcd for C<sub>7</sub>H<sub>11</sub>O<sub>2</sub> 127.0759, found 127.0759.

**(2E,4E)-4-methoxyhexa-2,4-dienal (1d'):**

<sup>1</sup>H NMR (CDCl<sub>3</sub>, 400 MHz): δ 9.67 (d, *J*= 8.0 Hz, 1H), 7.33 (d, *J*= 15.6 Hz, 1H), 6.49 (dd, *J*= 15.2, 8.0 Hz, 1H), 5.19 (dd, *J*= 14.8, 7.2 Hz, 1H), 3.63 (s, 3H), 1.89 (d, *J*= 3.2 Hz, 3H); <sup>13</sup>C NMR (CDCl<sub>3</sub>, 100 MHz): δ 193.9, 151.3, 142.0, 128.3, 106.5, 54.7, 12.1; HRMS (ESI): *m/z* [M+H]<sup>+</sup> calcd for C<sub>7</sub>H<sub>11</sub>O<sub>2</sub> 127.0759, found 127.0759.

**General Procedure for Preparation of O,O-Bis(trimethylsilyl)uracil Derivatives<sup>5</sup>**

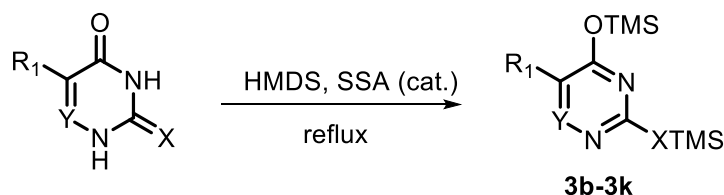

In an oven-dried round-bottom flask, a mixture of pyrimidine derivatives (10 mmol, 1 equiv), SSA (0.05 g), and HMDS (100 mL) was stirred at reflux until the solution became clear, typically after 0.5-2h. The catalyst was then filtered off and the filtrate was subjected to rotary evaporator under vacuum



to remove HMDS. The resulting crude product was sufficiently pure to be used in interrupted imino-Nazarov reaction without further purification.

### Representative Procedure for Silylated Pyrimidine Interrupted Imino-Nazarov

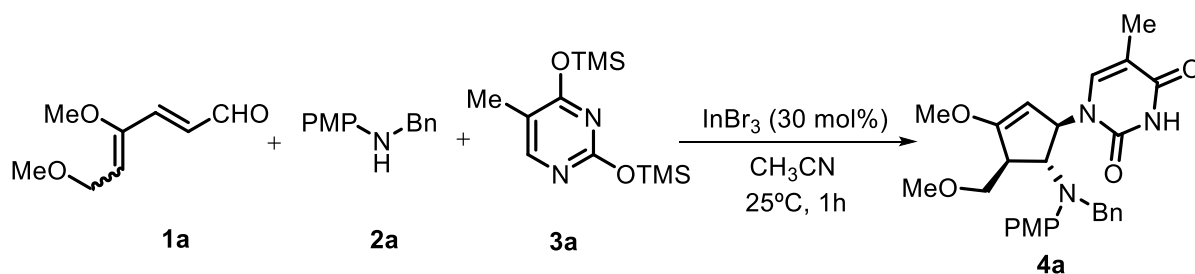

In an oven-dried round-bottomed flask, 4,6-dimethoxyhexa-2,4-dienal **1a** (15.6 mg, 0.1 mmol, 1 equiv) was dissolved in anhydrous MeCN (1 mL). To the resulting solution was added *N*-benzyl 4-methoxyaniline **2a** (21.3 mg, 0.1 mmol, 1 equiv) and O,O-bis(trimethylsilyl)thymine **3a** (51.1 mg, 0.2 mmol, 2 equiv) followed by InBr<sub>3</sub> (10.6 mg, 0.03 mmol, 0.3 equiv). The reaction mixture was then allowed to stir at ambient temperature for 1 hour. Upon complete consumption of starting materials, the reaction was subsequently quenched by addition of NaHCO<sub>3</sub> (2 mL). The resulting mixture was extracted with EtOAc (3 × 5 mL). The combined organic layers was washed with brine (5 mL), dried over Na<sub>2</sub>SO<sub>4</sub>, filtered and concentrated under reduced pressure to afford the crude residue. The crude residue is subjected to flash column chromatography on silica gel (CH<sub>2</sub>Cl<sub>2</sub>/MeOH) to give pure compound **4a**.

### Procedure for Synthesis of Diaminocyclopentane **7**

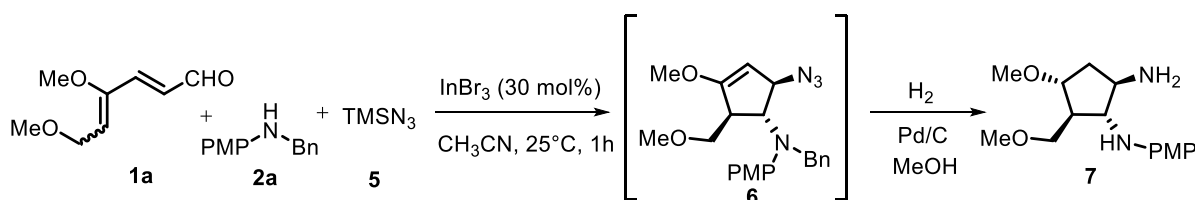

In an oven-dried round-bottomed flask, 4,6-dimethoxyhexa-2,4-dienal **1a** (15.6 mg, 0.1 mmol, 1 equiv) was dissolved in anhydrous MeCN (1 mL). To the resulting solution was added *N*-substituted aniline **2a** (21.3 mg, 0.1 mmol, 1 equiv) and trimethylsilyl azide **5** (23.0 mg, 0.12 mmol, 2 equiv) followed by

InBr<sub>3</sub> (10.6 mg, 0.03 mmol, 0.3 equiv). The reaction mixture was then allowed to stir at ambient temperature for 1 hour. Upon complete consumption of starting materials, the reaction was subsequently quenched by addition of NaHCO<sub>3</sub> (2 mL). The resulting mixture was extracted with EtOAc (3 × 5 mL). The combined organic layers was washed with brine (5 mL), dried over Na<sub>2</sub>SO<sub>4</sub>, filtered and concentrated under reduced pressure to afford the crude residue. The crude residue was treated with 10% Pd on carbon (10 mg) in MeOH at room temperature under H<sub>2</sub> atmosphere. Upon completion of reaction as monitor by TLC, the reaction mixture was filtered over a short pad of celite. The filtrate was concentrated under reduced pressure and purified by column chromatography on silica gel (hexane/EtOAc) affording pure compound **7**.

### References:

- 1) R. William, S. Wang, F. Ding, E. N. Arviana, X.-W. Liu, *Angew. Chem. Int. Ed.* **2014**, *53*, 10742-10746.
- 2) R. J. Lundgren, A. Sapping-Kumankumah, M. Stradiotto, *Chem. Eur. J.*, **2010**, *16*, 1983-1991.
- 3) L. Adak, K. Chattopadhyay, B. C. Ranu, *J. Org. Chem.* **2009**, *74*, 3982-3985.
- 4) K. C. Majumdar, S. Ganai, *Tetrahedron Lett.* **2013**, *54*, 6192-6195.
- 5) M. N. S. Rad, A. Khalafi-Nezhad, M. Divar, S. Behrouz, *Phosphorus, Sulfur Silicon Relat. Elem.*, **2010**, *185*, 1943-1954.

## Characterization Data of 4a-4s

### 1-(5-(benzyl(4-methoxyphenyl)amino)-3-methoxy-4-(methoxymethyl)cyclopent-2-enyl)-5-methylpyrimidine-2,4(1H,3H)-dione (4a):

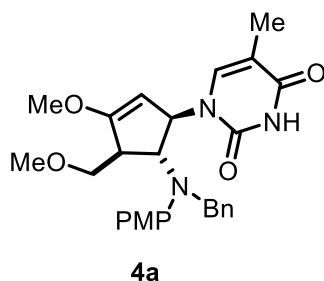

Reaction was carried out according to representative procedure described above. Flash column chromatography (hexane/EtOAc 1:1) gave **4a** as yellow oil (44.4 mg, 93%): <sup>1</sup>H NMR (CD<sub>3</sub>CN, 400 MHz): δ 9.47 (s, 1H), 7.35 (s, 1H), 7.33-7.35 (m, 2H), 7.24-7.32 (m, 2H), 7.17-7.21 (m, 1H), 6.79-6.82 (m, 2H), 6.71-6.75 (m, 2H), 5.85-5.87 (m, 1H), 4.51 (s, 1H), 4.52 (s, 2H), 4.14 (dd, *J*= 6.4, 5.6 Hz, 1H), 3.70 (dd, *J*= 9.6, 3.2 Hz, 1H), 3.68 (s, 3H), 3.67 (s, 3H), 3.43 (dd, *J*= 9.6, 2.8 Hz, 1H), 3.33 (s, 3H), 2.94-2.96 (m, 1H), 1.80 (d, *J*= 0.8 Hz, 3H); <sup>13</sup>C NMR (CD<sub>3</sub>CN, 100 MHz): δ 163.9, 162.2, 153.2, 151.3, 142.2, 139.6, 137.3, 128.3, 127.6, 126.8, 118.9, 114.3, 110.0, 94.1, 69.9, 68.6, 59.6, 58.4, 56.6, 55.0, 52.9, 46.5, 11.6; HRMS (ESI): *m/z* [M+H]<sup>+</sup> calcd for C<sub>27</sub>H<sub>32</sub>N<sub>3</sub>O<sub>5</sub> 478.2342, found 478.2341.

### 1-(5-(benzyl(4-methoxyphenyl)amino)-3-methoxy-4-(methoxymethyl)cyclopent-2-enyl)pyrimidine-2,4(1H,3H)-dione (4b):

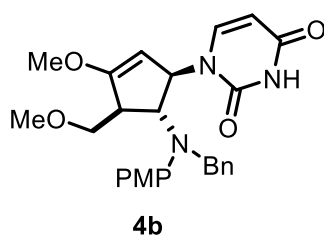

Reaction was carried out according to general procedure described above. Flash column chromatography (hexane/EtOAc 1:1) gave **4b** as colourless oil (42.2 mg, 91%): <sup>1</sup>H NMR (CD<sub>3</sub>CN, 400 MHz): δ 9.21 (s, 1H), 7.52 (d, *J*= 8.0 Hz, 1H), 7.34 (d, *J*= 7.2 Hz, 2H), 7.27 (t, *J*= 7.6 Hz, 2H), 7.20 (d, *J*= 7.2 Hz, 1H), 6.78-6.82 (m, 2H), 6.71-6.75 (m, 2H), 5.85-5.86 (m, 1H), 5.57 (d, *J*= 8.0 Hz, 1H), 4.51 (s, 1H), 4.43 (s, 2H), 4.15 (dd, *J*= 6.8, 5.6 Hz, 1H), 3.67-3.70 (m, 7H), 3.42 (dd, *J*= 9.6, 2.8 Hz,

1H), 3.31 (s, 3H), 2.94-2.96 (m, 1H); <sup>13</sup>C NMR (CD<sub>3</sub>CN, 100 MHz): δ 163.2, 162.5, 153.2, 151.2, 142.2, 141.5, 139.7, 128.3, 127.5, 126.8, 118.9, 114.2, 101.6, 93.8, 69.7, 69.0, 59.9, 58.4, 56.7, 55.0, 52.5, 46.6; HRMS (ESI): *m/z* [M+H]<sup>+</sup> calcd for C<sub>26</sub>H<sub>30</sub>N<sub>3</sub>O<sub>5</sub> 464.2185, found 464.2183.

**1-((1S,4R,5S)-5-(benzyl(4-methoxyphenyl)amino)-3-methoxy-4-(methoxymethyl)cyclopent-2-enyl)-5-methoxypyrimidine-2,4(1H,3H)-dione (4c):**

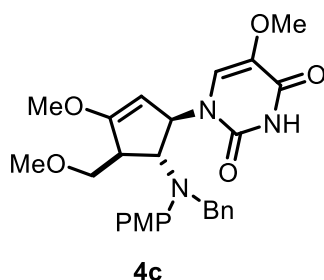

Reaction was carried out according to general procedure described above. Flash column chromatography (hexane/EtOAc 1:1) gave **4c** as brown oil (43.9 mg, 89%): <sup>1</sup>H NMR (CD<sub>3</sub>CN, 400 MHz): δ 9.29 (s, 1H), 7.32 (d, *J* = 6.8 Hz, 2H), 7.25-7.29 (m, 2H), 7.20-7.22 (m, 1H), 7.04 (s, 1H), 6.80-6.83 (m, 2H), 6.74-6.77 (m, 2H), 5.88-5.90 (m, 1H), 4.53 (s, 1H), 4.41 (s, 2H), 4.20 (dd, *J* = 6.4, 5.2 Hz, 1H), 3.69-3.72 (m, 7H), 3.62 (s, 3H), 3.41 (dd, *J* = 9.6, 2.4 Hz, 1H), 3.31 (s, 3H), 2.95-2.97 (m, 1H); <sup>13</sup>C NMR (CD<sub>3</sub>CN, 100 MHz): δ 162.2, 159.1, 153.2, 149.6, 142.1, 139.6, 136.5, 128.3, 127.6, 126.8, 120.8, 118.8, 114.3, 94.1, 69.9, 67.5, 60.0, 58.6, 57.0, 56.7, 55.0, 53.4, 46.4; HRMS (ESI): *m/z* [M+H]<sup>+</sup> calcd for C<sub>27</sub>H<sub>32</sub>N<sub>3</sub>O<sub>6</sub> 494.2291, found 494.2291.

**1-(5-(benzyl(4-methoxyphenyl)amino)-3-methoxy-4-(methoxymethyl)cyclopent-2-enyl)-5-fluoropyrimidine-2,4(1H,3H)-dione (4d):**

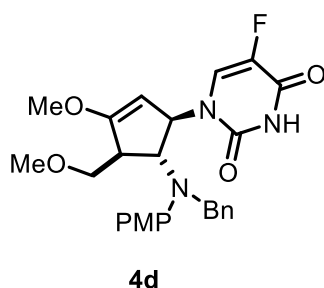

Reaction was carried out according to general procedure described above. Flash column chromatography (hexane/EtOAc 1:1) gave **4d** as brown solid (43.3 mg, 90%): <sup>1</sup>H NMR (CD<sub>3</sub>CN, 400 MHz): δ 9.48 (s, 1H), 7.68 (dd, *J* = 7.2, 0.8 Hz, 1H), 7.35 (d, *J* = 7.2 Hz, 2H), 7.27-7.31 (m, 2H), 7.19-7.23 (m, 1H), 6.81-6.84 (m, 2H), 6.74-6.78 (m, 2H), 5.83-5.85 (m, 1H), 4.52 (s, 1H), 4.42 (s, 2H), 4.13 (t, *J* = 5.6 Hz, 1H), 3.70-3.73 (m, 7H), 3.41 (dd, *J* = 9.6, 2.8 Hz, 1H), 3.33 (s, 3H), 2.93-2.96 (m, 1H); <sup>13</sup>C NMR (CD<sub>3</sub>CN, 100 MHz): δ 163.0, 157.1, 156.8, 153.3, 149.7, 142.1, 141.6, 139.6, 139.3, 128.3, 127.6, 126.8, 125.8, 125.5, 118.9, 114.3, 93.6, 70.0, 68.6, 60.9, 58.3, 56.8, 55.0, 52.9, 46.7; HRMS (ESI): *m/z* [M+H]<sup>+</sup> calcd for C<sub>26</sub>H<sub>29</sub>FN<sub>3</sub>O<sub>5</sub> 482.2091, found 482.2091.

**1-(5-(benzyl(4-methoxyphenyl)amino)-3-methoxy-4-(methoxymethyl)cyclopent-2-enyl)-5-chloropyrimidine-2,4(1H,3H)-dione (4e):**

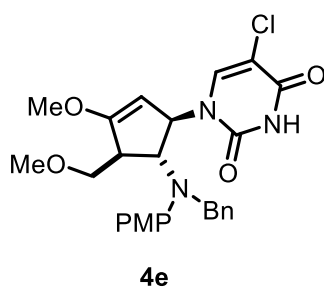

Reaction was carried out according to general procedure described above. Flash column chromatography (hexane/EtOAc 1:1) gave **4e** as brown liquid (43.2 mg, 87%): <sup>1</sup>H NMR (CD<sub>3</sub>CN, 400 MHz): δ 9.48 (s, 1H), 7.86 (s, 1H), 7.34 (d, *J* = 7.2 Hz, 2H), 7.27-7.31 (m, 2H), 7.22 (d, *J* = 7.2 Hz, 1H), 6.81-6.84 (m, 2H), 6.75-6.78 (m, 2H), 5.82-5.83 (m, 1H), 4.54 (s, 1H), 4.40 (s, 2H), 4.10 (dd, *J* = 5.6, 4.4 Hz, 1H), 3.70-3.74 (m, 7H), 3.38 (dd, *J* = 9.6, 2.8 Hz, 1H), 3.34 (s, 3H), 2.92-2.94 (m, 1H); <sup>13</sup>C NMR (CD<sub>3</sub>CN, 100 MHz): δ 163.4, 159.0, 153.4, 150.2, 142.0, 139.6, 139.2, 128.3, 127.6, 126.9, 119.0, 114.3, 107.5, 93.9, 70.1, 68.7, 61.3, 58.4, 56.9, 55.1, 53.1, 46.9; HRMS (ESI): *m/z* [M+H]<sup>+</sup> calcd for C<sub>26</sub>H<sub>29</sub>ClN<sub>3</sub>O<sub>5</sub> 498.1796, found 498.1794.

**1-(5-(benzyl(4-methoxyphenyl)amino)-3-methoxy-4-(methoxymethyl)cyclopent-2-enyl)-5-bromopyrimidine-2,4(1H,3H)-dione (4f):**

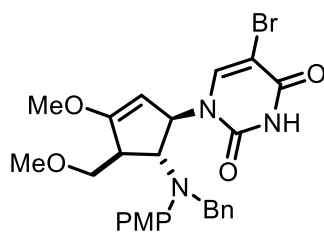

**4f**

Reaction was carried out according to general procedure described above. Flash column chromatography (hexane/EtOAc 1:1) gave **4f** as brown oil (47.7 mg, 88%):  $^1\text{H}$  NMR ( $\text{CD}_3\text{CN}$ , 400 MHz):  $\delta$  9.54 (s, 1H), 7.97 (s, 1H), 7.34 (d,  $J=7.2$  Hz, 2H), 7.27-7.31 (m, 2H), 7.20-7.21 (m, 2H), 6.82-6.84 (m, 2H), 6.75-6.77 (m, 2H), 5.81-5.83 (m, 1H), 4.55 (s, 1H), 4.40 (s, 2H), 4.09 (t,  $J=4.8$  Hz, 1H), 3.73 (dd,  $J=9.6, 2.4$  Hz, 1H), 3.71 (s, 3H), 3.70 (s, 3H), 3.37 (dd,  $J=9.6, 2.4$  Hz, 1H), 3.35 (s, 3H), 2.91-2.93 (m, 1H);  $^{13}\text{C}$  NMR ( $\text{CD}_3\text{CN}$ , 100 MHz):  $\delta$  163.4, 159.2, 153.4, 150.5, 142.0, 139.6, 128.3, 127.6, 127.0, 118.9, 114.4, 95.4, 94.0, 70.1, 68.6, 61.3, 58.4, 56.9, 55.1, 53.2, 47.0; HRMS (ESI):  $m/z$   $[\text{M}+\text{H}]^+$  calcd for  $\text{C}_{26}\text{H}_{29}\text{BrN}_3\text{O}_5$  542.1291, found 542.1291.

**1-(5-(benzyl(4-methoxyphenyl)amino)-3-methoxy-4-(methoxymethyl)cyclopent-2-enyl)-5-iodopyrimidine-2,4(1H,3H)-dione (4g):**

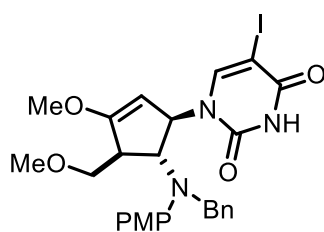

**4g**

Reaction was carried out according to general procedure described above. Flash column chromatography (hexane/EtOAc 1:1) gave **4g** as white solid (53.6 mg, 91%):  $^1\text{H}$  NMR ( $\text{CDCl}_3$ , 400 MHz):  $\delta$  8.40 (s, 1H), 8.07 (s, 1H), 7.22-7.32 (m, 5H), 6.77-6.83 (m, 4H), 5.88 (t,  $J=2.8$  Hz, 1H), 4.44 (s, 1H), 4.40 (d,  $J=15.6$  Hz, 1H), 4.34 (d,  $J=15.6$  Hz, 1H), 4.05-4.08 (m, 1H), 3.73-3.77 (m, 7H), 3.42 (dd,  $J=9.6, 2.8$  Hz, 1H), 2.87-2.89 (m, 1H);  $^{13}\text{C}$  NMR ( $\text{CDCl}_3$ , 100 MHz):  $\delta$  158.4, 154.6, 48.3, 145.0,

141.8, 133.6, 123.2, 122.2, 121.9, 113.9, 109.4, 88.6, 64.6, 62.2, 62.0, 56.2, 54.0, 51.9, 50.2, 49.3, 42.0;

HRMS (ESI):  $m/z$   $[M+H]^+$  calcd for  $C_{26}H_{29}IN_3O_5$  590.1152, found 590.1151.

**1-(5-(benzyl(4-methoxyphenyl)amino)-3-methoxy-4-(methoxymethyl)cyclopent-2-enyl)-5-(trifluoromethyl)pyrimidine-2,4(1H,3H)-dione (4h):**

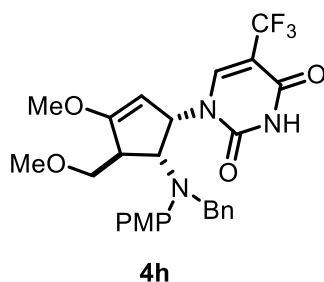

Reaction was carried out according to general procedure described above. Flash column chromatography (hexane/EtOAc 1:1) gave **4h** as yellow oil (41.9 mg, 79%):  $^1H$  NMR ( $CD_3CN$ , 400 MHz):  $\delta$  10.27 (s, 1H), 8.10 (s, 1H), 7.25 (d,  $J=7.2$  Hz, 2H), 7.16 (t,  $J=7.2$  Hz, 2H), 7.08-7.11 (m, 1H), 6.79 (d,  $J=8.8$  Hz, 2H), 6.66 (d,  $J=9.2$  Hz, 2H), 5.89 (s, 1H), 4.59 (s, 1H), 4.33 (s, 2H), 4.05 (t,  $J=4.4$  Hz, 1H), 3.62-3.63 (m, 4H), 3.59 (s, 3H), 3.27 (dd,  $J=9.6, 2.0$  Hz, 1H), 3.19 (s, 3H), 2.85 (s, 1H);  $^{13}C$  NMR ( $CD_3CN$ , 100 MHz):  $\delta$  163.8, 158.3, 153.6, 150.1, 143.1, 143.0, 143.0, 141.7, 139.4, 128.2, 127.5, 126.7, 119.2, 114.2, 93.9, 70.0, 68.0, 61.5, 58.1, 56.7, 54.6, 53.9, 47.2; HRMS (ESI):  $m/z$   $[M+H]^+$  calcd for  $C_{27}H_{29}F_3N_3O_5$  532.2059, found 532.2061.

**1-(5-(benzyl(4-methoxyphenyl)amino)-3-methoxy-4-(methoxymethyl)cyclopent-2-enyl)-5-nitropyrimidine-2,4(1H,3H)-dione (4i):**

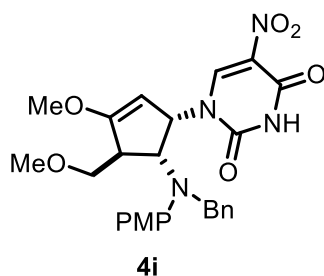

Reaction was carried out according to general procedure described above. Flash column chromatography (hexane/EtOAc 1:1) gave **4i** as brown oil (41.2 mg, 81%):  $^1H$  NMR ( $CD_3CN$ , 400

MHz):  $\delta$  9.38 (s, 1H), 9.12 (s, 1H), 7.36 (d,  $J$ = 7.2 Hz, 2H), 7.27-7.31 (m, 2H), 7.22 (t,  $J$ = 7.2 Hz, 2H), 6.82-6.86 (m, 2H), 6.75-6.80 (m, 2H), 5.86 (t,  $J$ = 2.4 Hz, 1H), 4.60 (d,  $J$ = 1.6 Hz, 1H), 4.40 (s, 2H), 4.17 (dd,  $J$ = 8.8, 4.0 Hz, 1H), 3.73-3.76 (m, 4H), 3.71 (s, 3H), 3.31-3.33 (m, 4H), 2.93-2.95 (s, 1H);  $^{13}\text{C}$  NMR ( $\text{CD}_3\text{CN}$ , 100 MHz):  $\delta$  164.8, 154.2, 153.5, 149.3, 147.1, 141.7, 139.6, 128.4, 127.6, 126.9, 118.9, 114.4, 93.7, 70.1, 68.8, 63.3, 58.5, 57.1, 55.0, 52.9, 47.4; HRMS (ESI):  $m/z$   $[\text{M}+\text{H}]^+$  calcd for  $\text{C}_{26}\text{H}_{29}\text{N}_4\text{O}_7$  509.2036, found 509.2036.

**1-(5-(benzyl(4-methoxyphenyl)amino)-3-methoxy-4-(methoxymethyl)cyclopent-2-enyl)-2-thioxo-2,3-dihydropyrimidin-4(1H)-one (4j):**

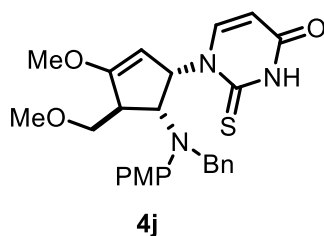

Reaction was carried out according to general procedure described above. Flash column chromatography (hexane/EtOAc 1:1) gave **4j** as brown oil (37.4 mg, 78%):  $^1\text{H}$  NMR ( $\text{CD}_3\text{CN}$ , 400 MHz):  $\delta$  10.xx (s, 1H), 7.65 (d,  $J$ = 8.4 Hz, 1H), 7.34 (d,  $J$ = 7.2 Hz, 2H), 7.27-7.30 (m, 2H), 7.21 (t,  $J$ = 7.2 Hz, 1H), 6.89-6.90 (m, 1H), 6.82-6.85 (m, 2H), 6.73-6.77 (m, 2H), 5.88 (d,  $J$ = 8.0 Hz, 1H), 4.57 (s, 1H), 4.52 (d,  $J$ = 16.0 Hz, 1H), 4.44 (d,  $J$ = 16.0 Hz, 1H), 4.17 (dd,  $J$ = 10.6, 6.4 Hz, 1H), 3.70-3.73 (m, 4H), 3.69 (s, 3H), 3.41 (dd,  $J$ = 9.6, 2.8 Hz, 1H), 3.32 (s, 3H), 2.97-2.99 (m, 1H);  $^{13}\text{C}$  NMR ( $\text{CD}_3\text{CN}$ , 100 MHz):  $\delta$  176.8, 163.1, 153.3, 142.1, 141.8, 139.5, 128.3, 127.6, 126.8, 118.9, 114.2, 107.1, 94.1, 69.6, 68.3, 66.5, 58.4, 56.8, 55.0, 53.4, 47.0; HRMS (ESI):  $m/z$   $[\text{M}+\text{H}]^+$  calcd for  $\text{C}_{26}\text{H}_{30}\text{N}_3\text{O}_4\text{S}$  480.1957, found 480.1954.

**2-(5-(benzyl(4-methoxyphenyl)amino)-3-methoxy-4-(methoxymethyl)cyclopent-2-enyl)-1,2,4-triazine-3,5(2H,4H)-dione (4k):**



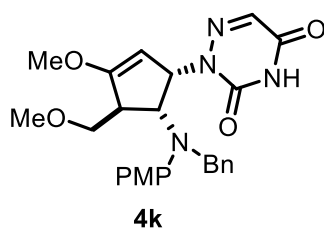

Reaction was carried out according to general procedure described above. Flash column chromatography (hexane/EtOAc 1:1) gave **4k** as brown oil (38.1 mg, 82%):  $^1\text{H}$  NMR ( $\text{CDCl}_3$ , 400 MHz):  $\delta$  9.34 (s, 1H), 7.17-7.30 (m, 6H), 6.80-6.83 (m, 2H), 6.72-6.75 (m, 2H), 5.97-5.99 (m, 1H), 4.63 (dd,  $J=7.6, 6.8$  Hz, 1H), 4.49 (d,  $J=16.0$  Hz, 1H), 4.38 (d,  $J=16.0$  Hz, 1H), 3.67-3.73 (m, 7H), 3.61 (dd,  $J=9.6, 3.6$  Hz, 1H), 3.43 (s, 3H), 3.01-3.05 (m, 1H);  $^{13}\text{C}$  NMR ( $\text{CD}_3\text{CN}$ , 100 MHz):  $\delta$  161.1, 155.8, 153.0, 148.1, 142.4, 139.4, 135.3, 128.4, 127.4, 126.8, 118.5, 114.5, 93.3, 70.3, 66.0, 62.9, 59.1, 56.7, 55.5, 52.9, 45.6; HRMS (ESI):  $m/z$   $[\text{M}+\text{H}]^+$  calcd for  $\text{C}_{25}\text{H}_{29}\text{N}_4\text{O}_5$  465.2138, found 465.2139.

**1-(3-methoxy-4-(methoxymethyl)-5-((4-methoxyphenyl)(methyl)amino)cyclopent-2-enyl)-5-methylpyrimidine-2,4(1H,3H)-dione (4l):**

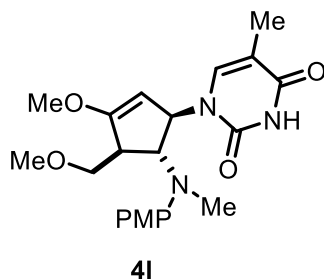

Reaction was carried out according to general procedure described above. Flash column chromatography (hexane/EtOAc 1:1) gave **4l** as colourless oil (36.5 mg, 91%):  $^1\text{H}$  NMR ( $\text{CD}_3\text{CN}$ , 400 MHz):  $\delta$  8.90 (s, 1H), 7.44 (s, 1H), 6.77-6.79 (m, 2H), 6.72-6.75 (m, 2H), 5.71 (d,  $J=5.2$  Hz, 1H), 4.51 (s, 1H), 4.25 (t,  $J=6.4$  Hz, 1H), 3.72 (s, 6H), 3.69 (dd,  $J=9.6, 3.2$  Hz, 1H), 3.32-3.35 (m, 4H), 2.90-2.92 (m, 1H), 2.81 (s, 3H), 1.85 (s, 3H);  $^{13}\text{C}$  NMR ( $\text{CD}_3\text{CN}$ , 100 MHz):  $\delta$  163.7, 162.1, 152.4, 150.9, 144.6, 137.2, 116.2, 114.3, 109.9, 93.8, 69.5, 68.5, 58.4, 58.3, 56.6, 55.1, 45.8, 33.3, 11.6; HRMS (ESI):  $m/z$   $[\text{M}+\text{H}]^+$  calcd for  $\text{C}_{21}\text{H}_{28}\text{N}_3\text{O}_5$  402.2029, found 402.2029.

**1-(5-(allyl(4-methoxyphenyl)amino)-3-methoxy-4-(methoxymethyl)cyclopent-2-enyl)-5-methylpyrimidine-2,4(1H,3H)-dione (4m):**

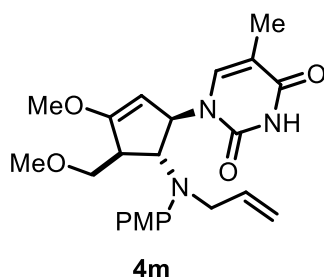

Reaction was carried out according to general procedure described above. Flash column chromatography (hexane/EtOAc 1:1) gave **4m** as white solid (32.1 mg, 75%): <sup>1</sup>H NMR (CD<sub>3</sub>CN, 400 MHz): δ 9.32 (s, 1H), 7.48 (d, *J*= 1.2 Hz, 1H), 6.76-6.79 (m, 2H), 6.71-6.74 (m, 2H), 5.82-5.89 (m, 1H), 5.76-5.78 (m, 1H), 5.18 (dd, *J*= 17.2, 2.0 Hz, 1H), 5.08 (dd, *J*= 10.4, 1.6 Hz, 1H), 4.53 (s, 1H), 4.13 (dd, *J*= 6.4, 5.2 Hz, 1H), 3.85-3.87 (m, 2H), 3.72 (s, 3H), 3.68-3.71 (m, 4H), 3.41 (dd, *J*= 9.6, 2.8 Hz, 1H), 3.37 (s, 3H), 2.90-2.92 (m, 1H), 1.86 (d, *J*= 0.8 Hz, 3H); <sup>13</sup>C NMR (CD<sub>3</sub>CN, 100 MHz): δ 163.9, 162.3, 152.6, 151.2, 142.2, 137.5, 136.1, 115.5, 114.3, 114.1, 110.0, 94.2, 69.8, 68.0, 59.6, 58.4, 56.6, 55.1, 51.9, 46.9, 11.7; HRMS (ESI): *m/z* [M+H]<sup>+</sup> calcd for C<sub>23</sub>H<sub>30</sub>N<sub>3</sub>O<sub>5</sub> 428.2185, found 428.2185.

**1-(3-methoxy-4-(methoxymethyl)-5-((4-methoxyphenyl)(prop-2-ynyl)amino)cyclopent-2-enyl)-5-methylpyrimidine-2,4(1H,3H)-dione (4n):**

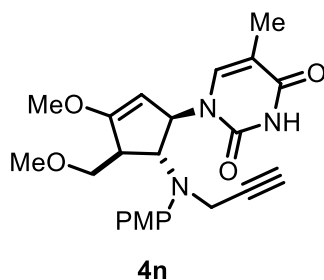

Reaction was carried out according to general procedure described above. Flash column chromatography (hexane/EtOAc 1:1) gave **4n** as white solid (37.9 mg, 89%): <sup>1</sup>H NMR (CD<sub>3</sub>CN, 400 MHz): δ 9.25 (s, 1H), 7.50 (d, *J*= 1.2 Hz, 1H), 6.90 (d, *J*= 9.2 Hz, 1H), 6.83 (d, *J*= 9.2 Hz, 1H), 5.72-5.74 (m, 1H), 4.52 (s, 1H), 4.16 (t, *J*= 6.0 Hz, 2H), 4.03 (t, *J*= 2.0 Hz, 1H), 3.74 (s, 3H), 4.67-3.71 (m,

4H), 3.36-3.40 (m, 4H), 2.95-2.96 (m, 1H), 1.86 (d,  $J=0.8$  Hz, 3H);  $^{13}\text{C}$  NMR ( $\text{CD}_3\text{CN}$ , 100 MHz):  $\delta$  163.8, 162.1, 154.1, 151.1, 141.5, 137.5, 119.5, 114.3, 109.9, 93.9, 80.9, 72.6, 69.7, 67.8, 59.6, 58.4, 56.7, 55.0, 47.1, 39.7, 11.7; HRMS (ESI):  $m/z$   $[\text{M}+\text{H}]^+$  calcd for  $\text{C}_{23}\text{H}_{28}\text{N}_3\text{O}_5$  426.2029, found 426.2029.

**1-(3-methoxy-5-((4-methoxybenzyl)(4-methoxyphenyl)amino)-4-(methoxymethyl)cyclopent-2-enyl)-5-methylpyrimidine-2,4(1H,3H)-dione (4o):**

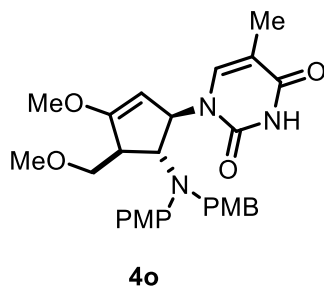

Reaction was carried out according to general procedure described above. Flash column chromatography (hexane/EtOAc 1:1) gave **4o** as colourless solid (46.7 mg, 92%):  $^1\text{H}$  NMR ( $\text{CD}_3\text{CN}$ , 400 MHz):  $\delta$  9.37 (s, 1H), 7.31 (d,  $J=1.2$  Hz, 1H), 7.22 (d,  $J=8.8$  Hz, 2H), 6.80-6.85 (m, 4H), 6.74-6.77 (m, 2H), 5.84-5.87 (m, 1H), 4.50 (s, 1H), 4.36 (d,  $J=15.2$  Hz, 1H), 4.30 (d,  $J=15.2$  Hz, 1H), 4.09 (dd,  $J=6.4, 2.4$  Hz, 1H), 3.75 (s, 3H), 3.68-3.72 (m, 7H), 3.41 (dd,  $J=9.6, 2.8$  Hz, 1H), 3.39 (s, 3H), 2.93-2.95 (m, 1H), 1.79 (d,  $J=1.2$  Hz, 3H);  $^{13}\text{C}$  NMR ( $\text{CD}_3\text{CN}$ , 100 MHz):  $\delta$  163.9, 162.2, 158.7, 153.2, 151.3, 142.2, 137.2, 131.3, 129.0, 119.0, 114.3, 113.6, 109.9, 94.1, 70.0, 68.0, 59.7, 58.3, 56.6, 55.0, 54.8, 52.6, 46.3, 11.6; HRMS (ESI):  $m/z$   $[\text{M}+\text{H}]^+$  calcd for  $\text{C}_{28}\text{H}_{34}\text{N}_3\text{O}_6$  508.2448, found 508.2449.

**1-(5-(benzyl(4-chlorophenyl)amino)-3-methoxy-4-(methoxymethyl)cyclopent-2-enyl)-5-methylpyrimidine-2,4(1H,3H)-dione (4p):**

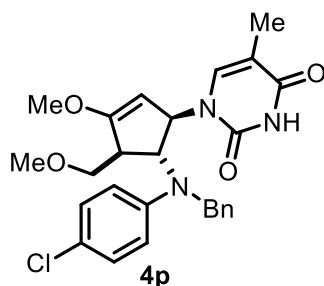

Reaction was carried out according to general procedure described above. Flash column chromatography (hexane/EtOAc 1:1) gave **4p** as yellow oil (27.0 mg, 56%):  $^1\text{H}$  NMR ( $\text{CD}_3\text{CN}$ , 400 MHz):  $\delta$  9.06 (s, 1H), 7.38 (s, 1H), 7.28-7.32 (m, 4H), 7.22-7.27 (m, 1H), 7.09-7.13 (m, 2H), 6.67-6.71 (m, 2H), 5.83-5.85 (m, 1H), 4.56 (s, 1H), 4.55 (d,  $J=16.8$  Hz, 2H), 4.49 (d,  $J=16.8$ , 1H), 4.29 (dd,  $J=6.0, 5.2$  Hz, 1H), 3.73 (s, 3H), 3.70 (dd,  $J=9.6, 3.2$  Hz, 1H), 3.44 (dd,  $J=9.6, 3.2$  Hz, 1H), 3.35 (s, 3H), 2.98-3.00 (m, 1H), 1.82 (d,  $J=0.8$  Hz, 3H);  $^{13}\text{C}$  NMR ( $\text{CD}_3\text{CN}$ , 100 MHz):  $\delta$  163.7, 162.2, 151.1, 147.0, 138.9, 137.1, 128.6, 128.5, 127.1, 126.9, 121.9, 116.8, 116.1, 110.0, 94.1, 70.0, 67.4, 59.9, 58.4, 56.8, 52.5, 46.7, 11.6; HRMS (ESI):  $m/z$   $[\text{M}+\text{H}]^+$  calcd for  $\text{C}_{26}\text{H}_{29}\text{ClN}_3\text{O}_4$  482.1847, found 482.1848.

**1-(5-(benzyl(4-methoxyphenyl)amino)-3-(benzyloxy)-4-(benzyloxymethyl)cyclopent-2-enyl)-5-methylpyrimidine-2,4(1H,3H)-dione (4q):**

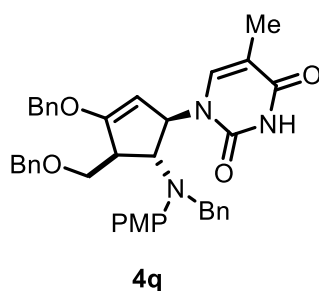

Reaction was carried out according to general procedure described above. Flash column chromatography (hexane/EtOAc 2:1) gave **4q** as brown oil (57.3 mg, 91%):  $^1\text{H}$  NMR ( $\text{CD}_3\text{CN}$ , 400 MHz):  $\delta$  9.84 (s, 1H), 7.32 (d,  $J=6.0$  Hz, 2H), 7.21-7.24 (m, 10H), 7.14 (t,  $J=7.6$  Hz, 2H), 7.05-7.09 (m, 2H), 6.77 (d,  $J=7.2$  Hz, 2H), 6.62 (d,  $J=7.2$  Hz, 2H), 5.88 (d,  $J=4.8$  Hz, 1H), 4.97 (d,  $J=12.8$  Hz, 1H), 4.93 (d,  $J=12.8$  Hz, 1H), 4.46-4.49 (m, 2H), 4.40 (d,  $J=12.0$  Hz, 2H), 4.16 (s, 2H), 3.87 (dd,  $J=9.6, 5.6$  Hz, 1H), 3.57 (s, 3H), 3.53 (dd,  $J=9.6, 2.4$  Hz, 1H), 2.98-3.00 (m, 1H), 1.34 (s, 3H);  $^{13}\text{C}$  NMR ( $\text{CD}_3\text{CN}$ , 100 MHz):  $\delta$  163.4, 160.4, 153.5, 151.0, 142.1, 139.5, 138.4, 136.7, 136.6, 128.3, 128.1, 127.7, 127.6, 127.5, 127.4, 127.1, 126.6, 119.6, 114.1, 109.7, 95.9, 73.0, 70.8, 67.8, 67.5, 59.5, 51.6, 53.9, 46.9, 11.4; HRMS (ESI):  $m/z$   $[\text{M}+\text{H}]^+$  calcd for  $\text{C}_{39}\text{H}_{40}\text{N}_3\text{O}_5$  630.2968, found 630.2968.

**1-(5-(benzyl(4-methoxyphenyl)amino)-3-(methoxymethoxy)-4-((methoxymethoxy)methyl)cyclopent-2-enyl)-5-methylpyrimidine-2,4(1H,3H)-dione (4r):**

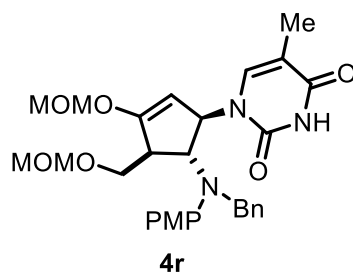

Reaction was carried out according to general procedure described above. Flash column chromatography (hexane/EtOAc 2:1) gave **4r** as brown oil (27.9 mg, 52%): <sup>1</sup>H NMR (CDCl<sub>3</sub>, 400 MHz): δ 8.41 (s, 1H), 7.36 (s, 1H), 6.84 (d, *J* = 9.2 Hz, 1H), 5.97 (s, 1H), 5.04 (s, 1H), 4.63 (d, *J* = 5.6 Hz, 1H), 4.57 (d, *J* = 6.4 Hz, 1H), 4.43 (d, *J* = 16.0 Hz, 1H), 4.39 (d, *J* = 16.0 Hz, 1H), 4.08 (t, *J* = 5.6, 1H), 3.88 (dd, *J* = 8.0 Hz, 1H), 3.74 (s, 3H), 3.59 (d, *J* = 8.0 Hz, 1H), 3.46 (s, 3H), 3.27 (s, 3H), 2.99 (m, 1H), 1.87 (s, 3H); <sup>13</sup>C NMR (CDCl<sub>3</sub>, 100 MHz): δ 163.7, 158.5, 153.7, 150.7, 142.0, 139.1, 137.3, 128.5, 127.4, 127.0, 119.6, 114.5, 110.5, 97.4, 96.7, 95.0, 67.2, 65.1, 60.3, 56.4, 55.5, 55.3, 54.7, 46.9, 12.6; HRMS (ESI): *m/z* [M+H]<sup>+</sup> calcd for C<sub>29</sub>H<sub>36</sub>N<sub>3</sub>O<sub>7</sub> 538.2553, found 538.2551.

**1-(5-(benzyl(4-methoxyphenyl)amino)-3-methoxy-4-methylcyclopent-2-enyl)-5-methylpyrimidine-2,4(1H,3H)-dione (4s):**

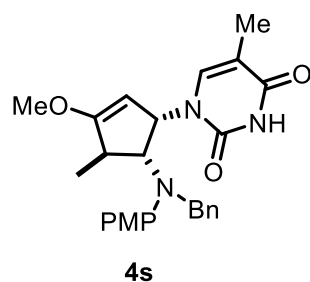

Reaction was carried out according to general procedure described above. Flash column chromatography (hexane/EtOAc 1:1) gave **4s** as brown oil (38.9 mg, 87%): <sup>1</sup>H NMR (CD<sub>3</sub>CN, 400 MHz): δ 9.29 (s, 1H), 7.35 (d, *J* = 7.6 Hz, 2H), 7.24-7.28 (m, 3H), 7.18 (t, *J* = 7.2 Hz, 1H), 6.81-6.84 (m, 2H), 6.67-6.70 (m, 2H), 5.82-5.84 (m, 1H), 4.46 (s, 2H), 4.39 (s, 1H), 3.77 (t, *J* = 7.6 Hz, 1H), 3.69 (s, 3H), 3.66 (s, 3H), 2.88-2.95 (m, 1H), 1.82 (d, *J* = 1.2 Hz, 3H), 1.28 (d, *J* = 6.8 Hz, 1H); <sup>13</sup>C NMR (CD<sub>3</sub>CN, 100 MHz): δ 164.4, 163.8, 153.3, 151.3, 142.6, 139.7, 136.7, 136.6, 128.2, 127.6, 126.7,

119.6, 114.0, 110.2, 91.4, 91.3, 76.3, 59.2, 56.4, 56.3, 55.0, 54.9, 51.6, 39.7, 15.8, 11.4; HRMS (ESI):  $m/z$   $[M+H]^+$  calcd for  $C_{26}H_{30}N_3O_4$  448.2236, found 448.2238.

### Characterization Data of **7**

#### **4-methoxy-5-(methoxymethyl)-N1-(4-methoxyphenyl)cyclopentane-1,2-diamine (7):**

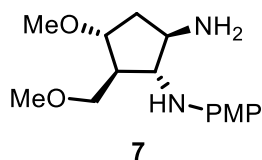

Reaction was carried out according to procedure described above. Flash column chromatography ( $CH_2Cl_2/MeOH$  9:1) gave **7** as brown oil (27 mg, 84% over 2 step):  $^1H$  NMR ( $CD_3OD$ , 400 MHz):  $\delta$  6.73-6.74 (m, 4H), 3.71-3.72 (m, 4H), 3.48 (dd,  $J=9.2, 3.6$  Hz, 1H), 3.32-3.37 (m, 5H), 3.31 (s, 3H), 3.28 (s, 3H), 3.19 (dd,  $J=17.6, 8.0$  Hz, 1H);  $^{13}C$  NMR ( $CDCl_3$ , 100 MHz):  $\delta$  152.3, 142.8, 115.0, 114.4, 80.4, 71.7, 63.2, 57.7, 56.1, 55.4, 54.8, 52.9, 36.5; HRMS (ESI):  $m/z$   $[M+H]^+$  calcd for  $C_{14}H_{22}N_2O_3$  266.1630, found 266.1630.

# 1H, 13C and 2D (COSY and NOESY) NMR Spectra

E1-040-2p, 1H, BBFO1400, CDCL3, Jun-14

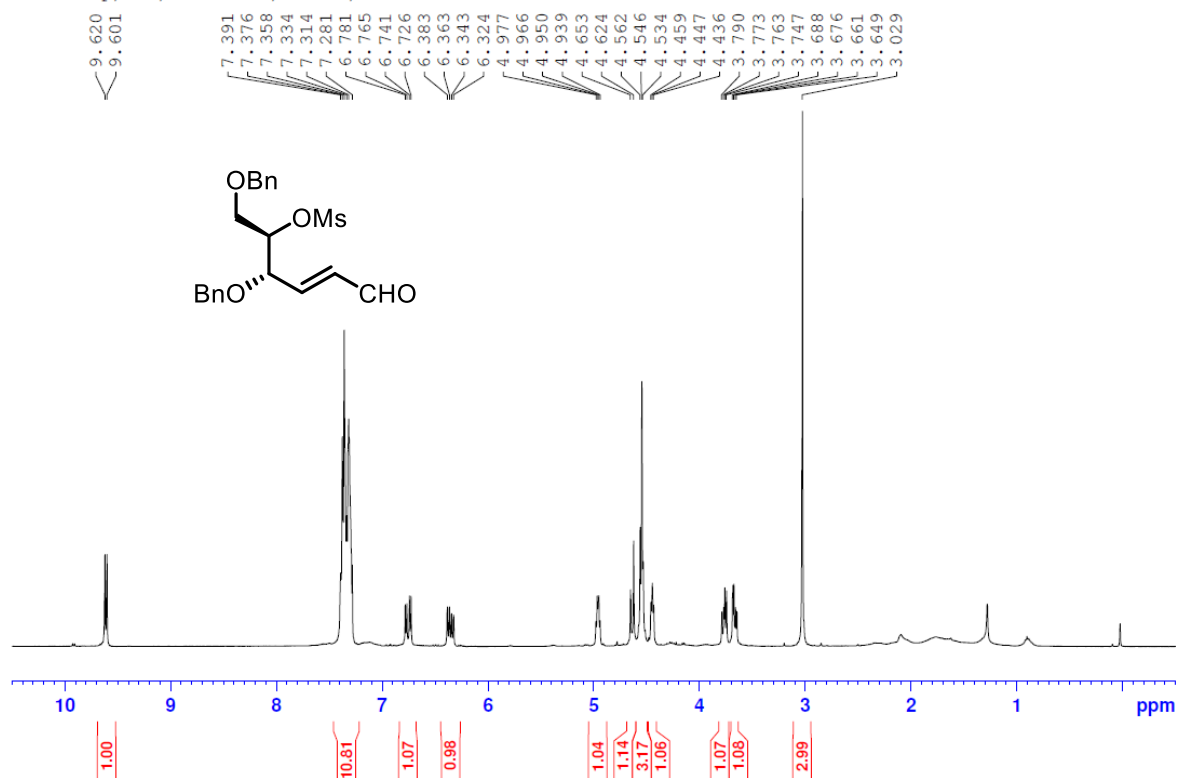

E1-040-2p, 13C, BBFO1400, CDCL3, Jun-14

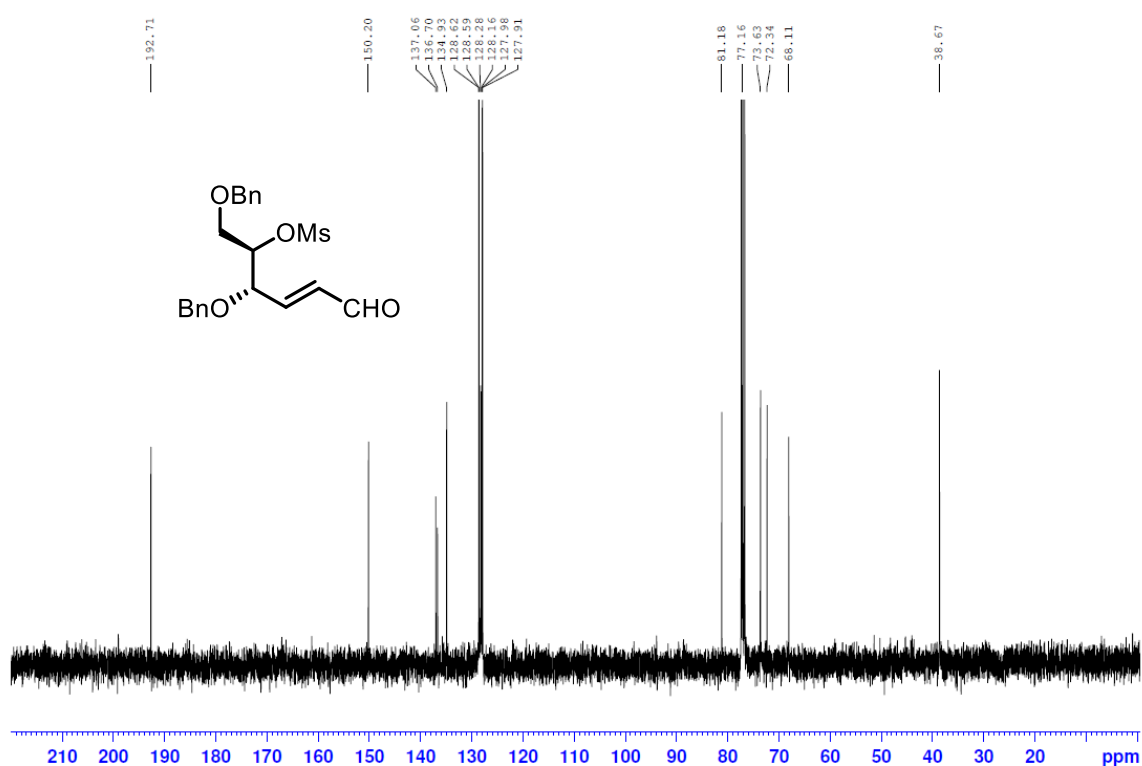

E1-043-2p, 1H, BBFO2 400, CDC13, Jun-14

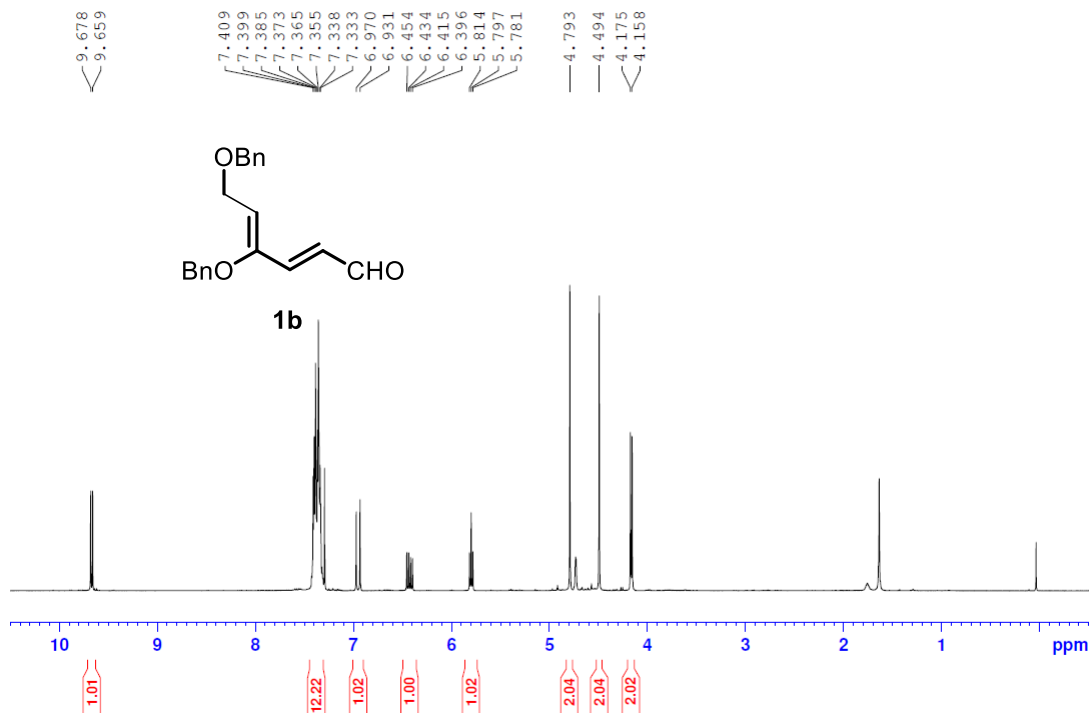

E1-043-2p, 13C, BBFO2 400, CDC13, Jun-14

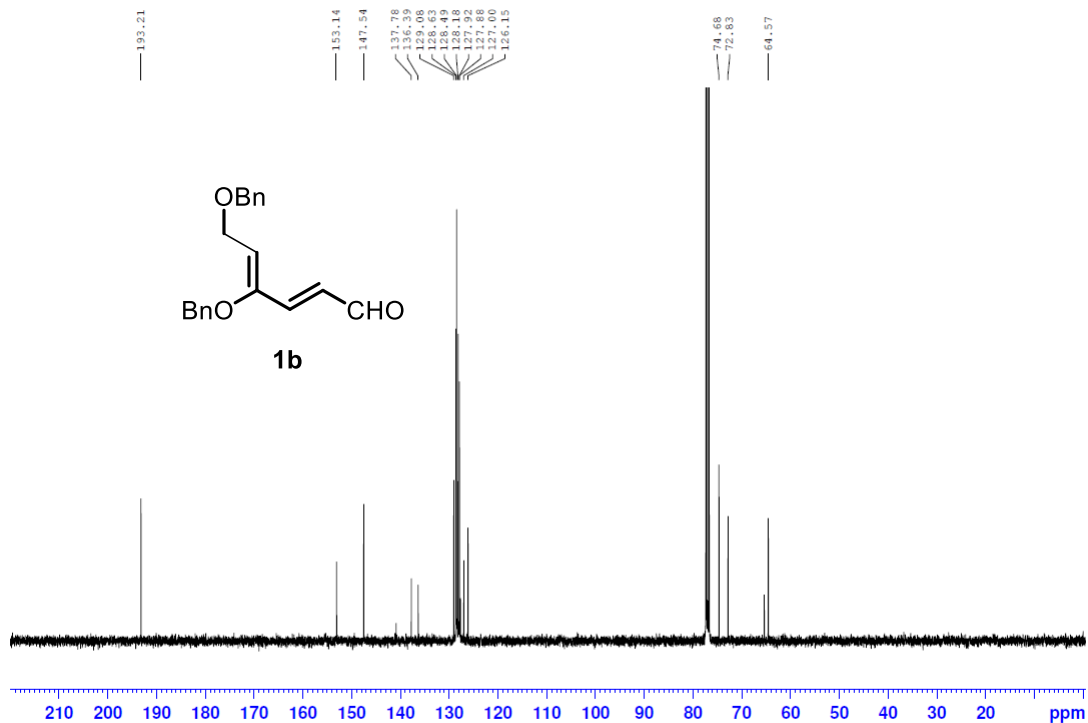



E1-043-1p, 1H, BBFO2 400, CDC13, Jun-14

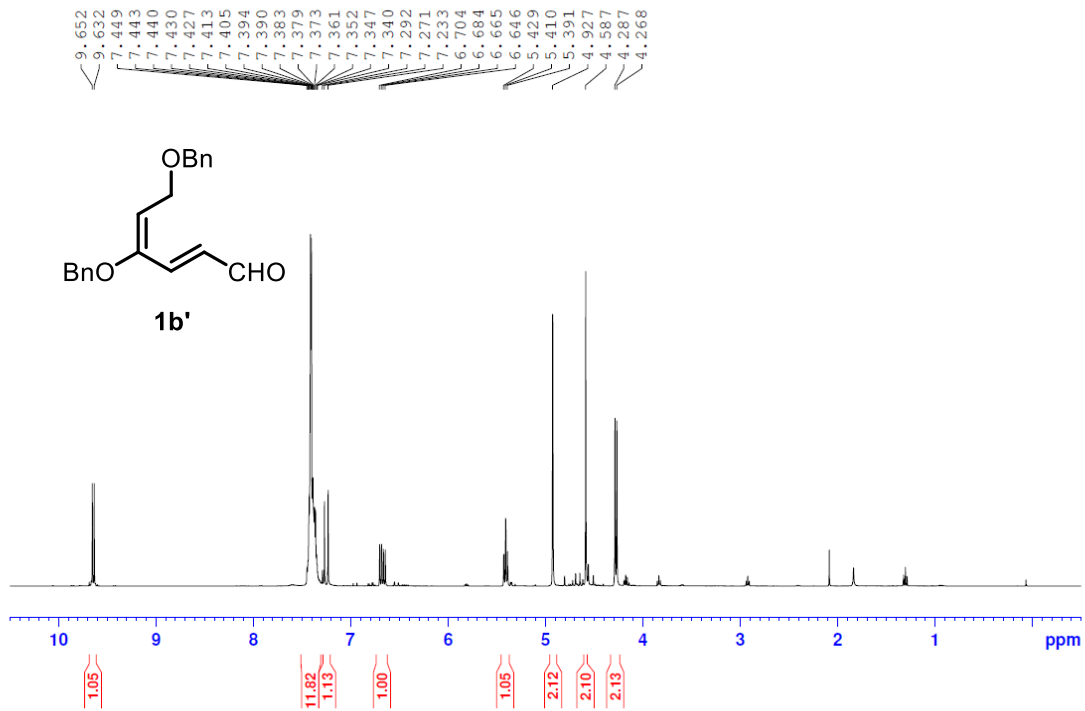

E1-043-1p, 13C, BBFO2 400, CDC13, Jun-14

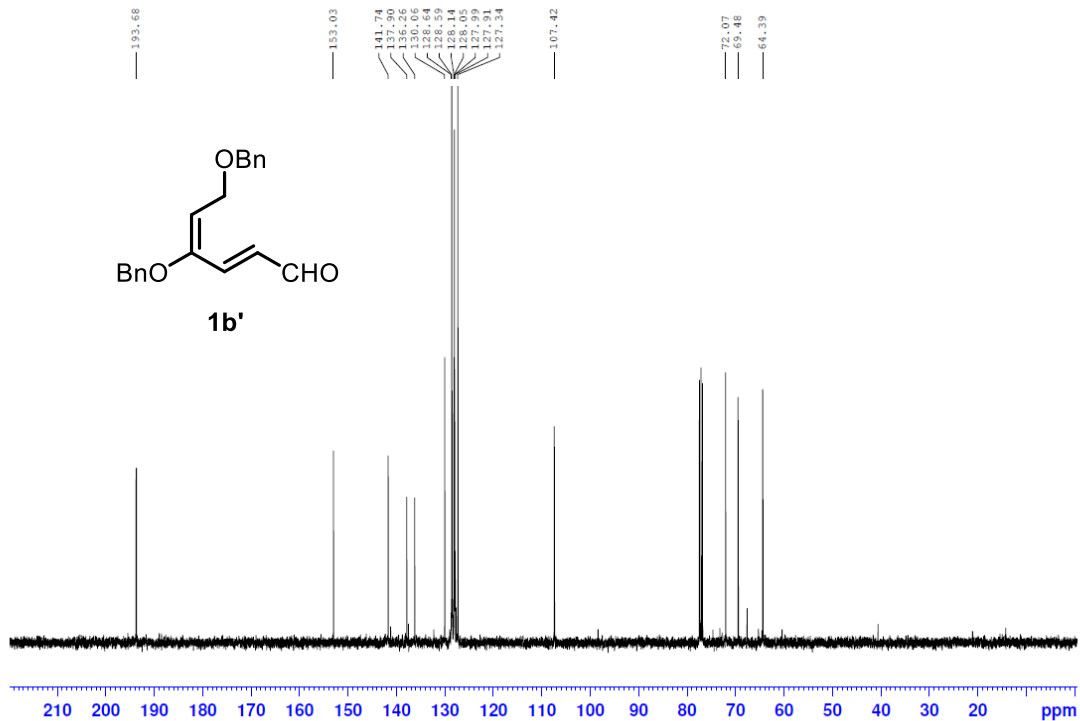

E1-048-p, 1H, BBF01400, CDC13, Jun-14

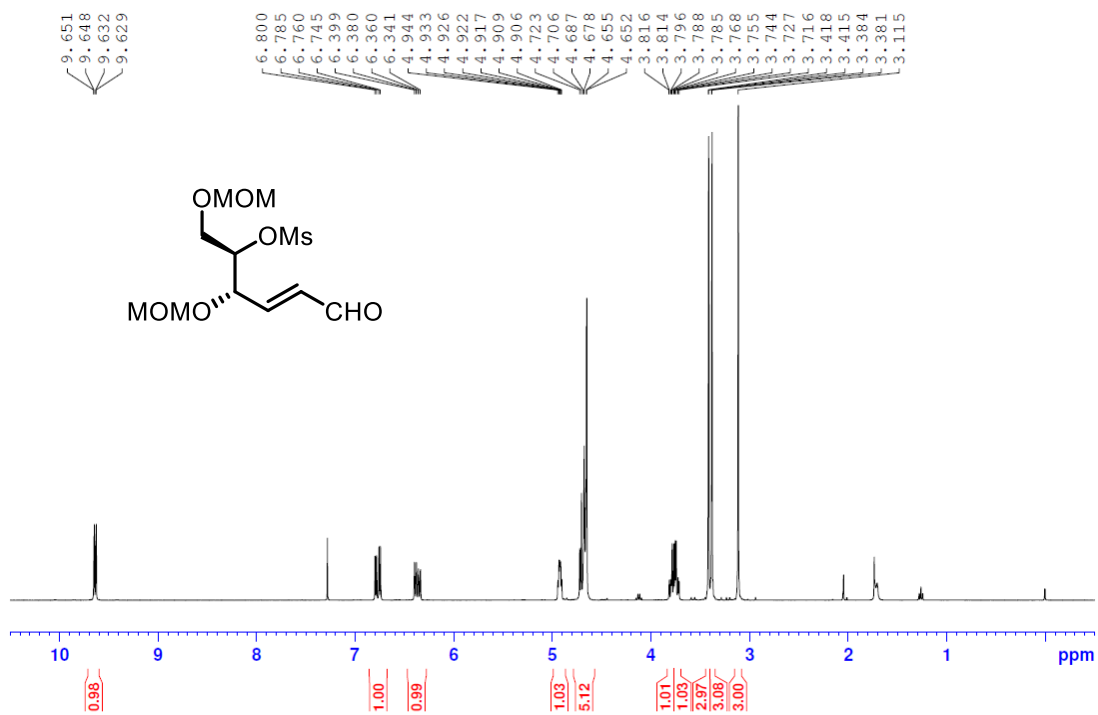

E1-048-p, 13C, BBF01400, CDC13, Jun-14

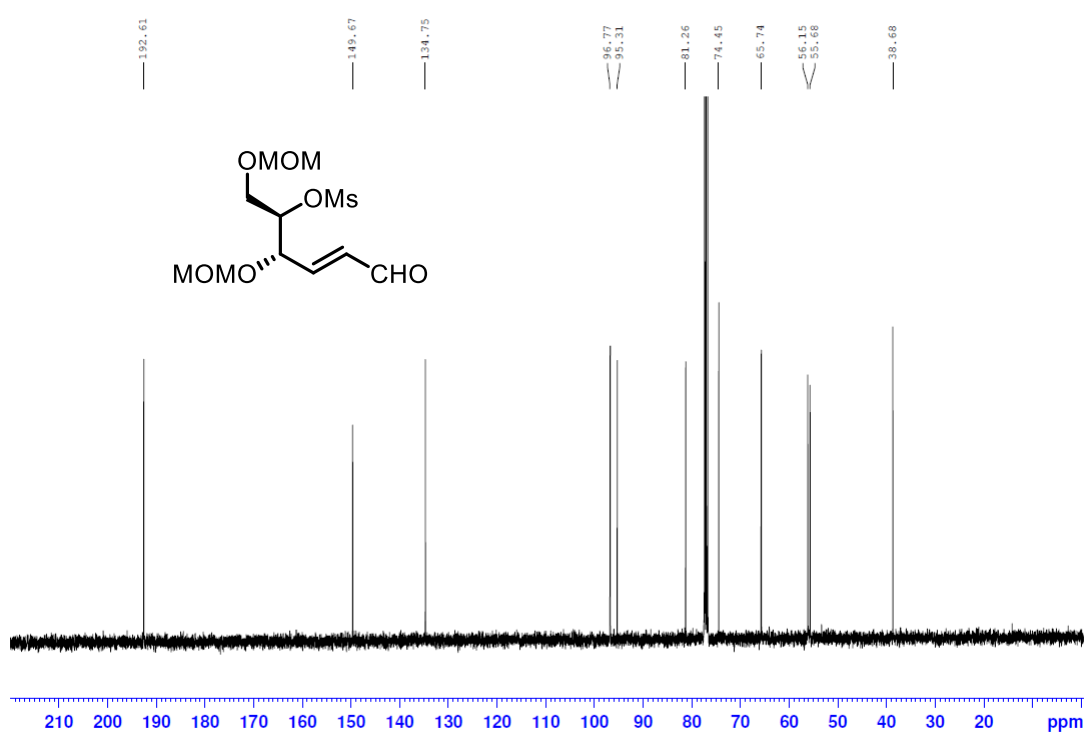

E1-046-2, 1H, BBFO2 400, CDC13, Jun-14

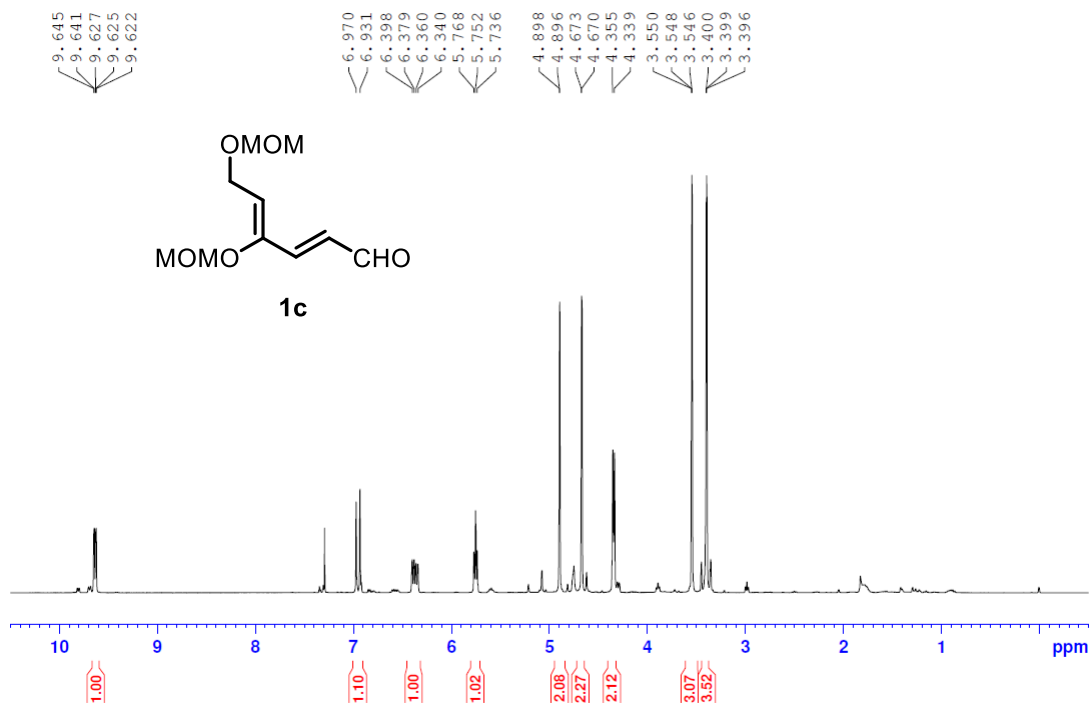

E1-046-2, 13C, BBFO2 400, CDC13, Jun-14

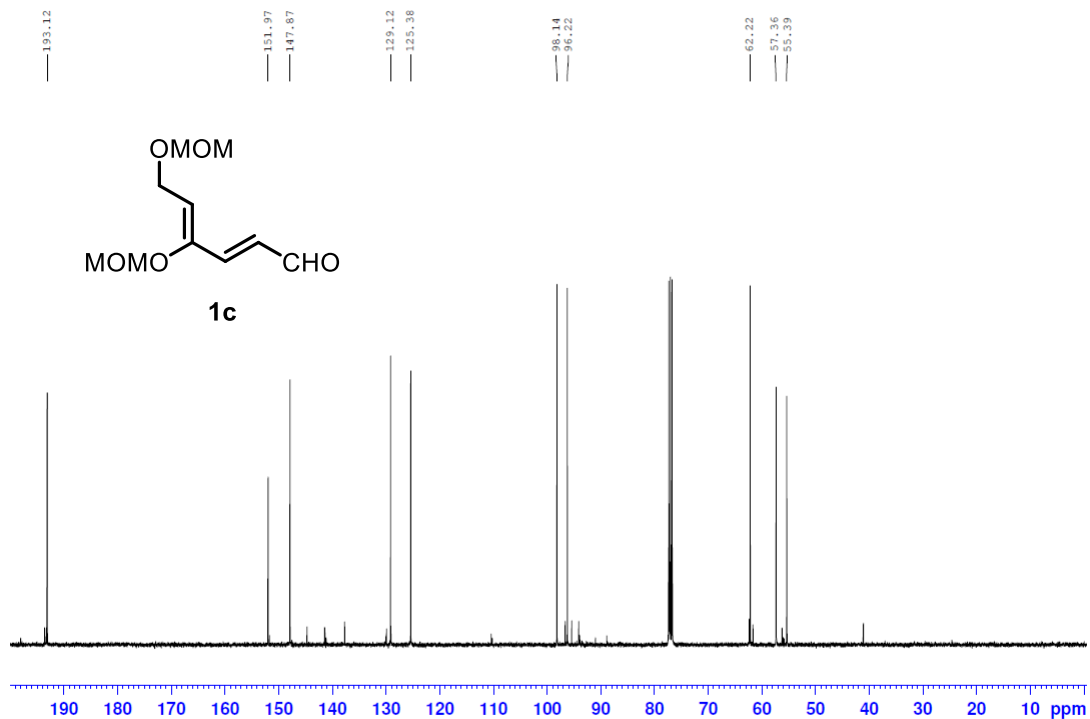

E1-046-1, 1H, AV500, CDCl3, Jun-14

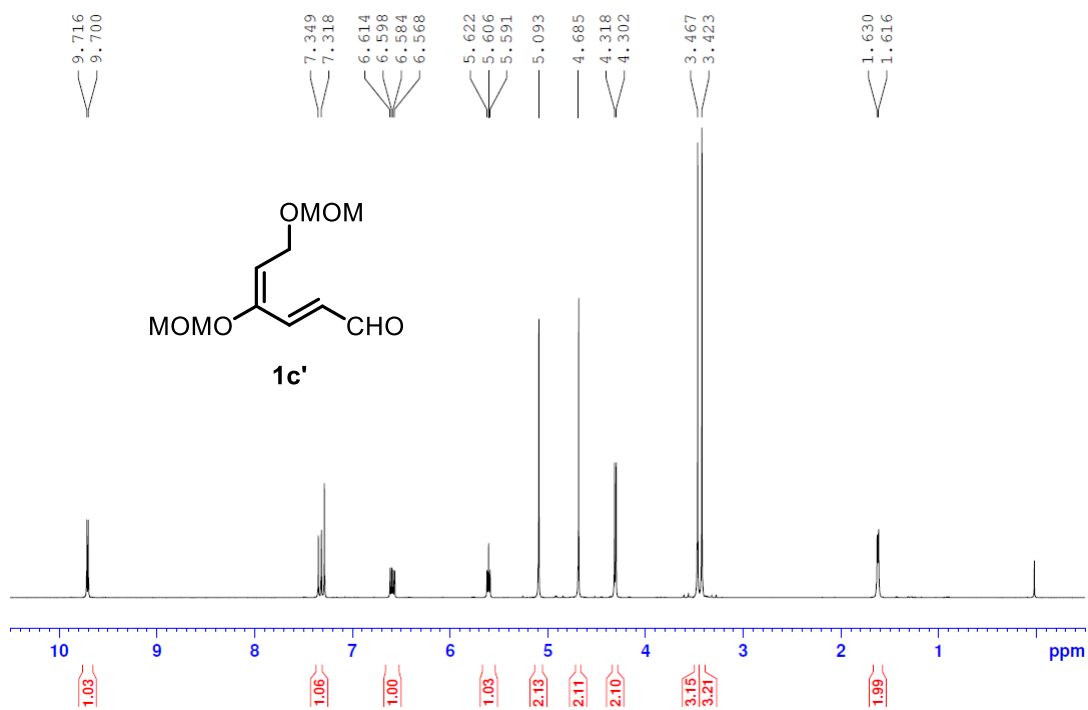

E1-046-1, 13C, AV500, CDCl3, Jun-14

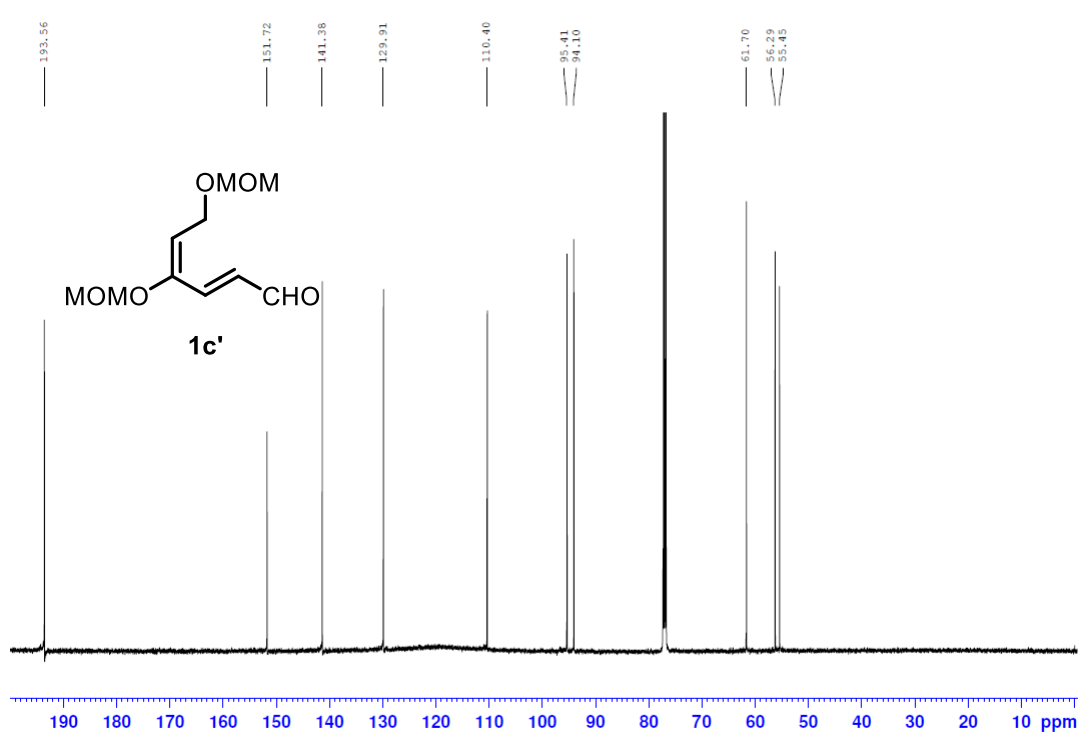

R6-113-1, 1H, AV500, CDCl3, May-14

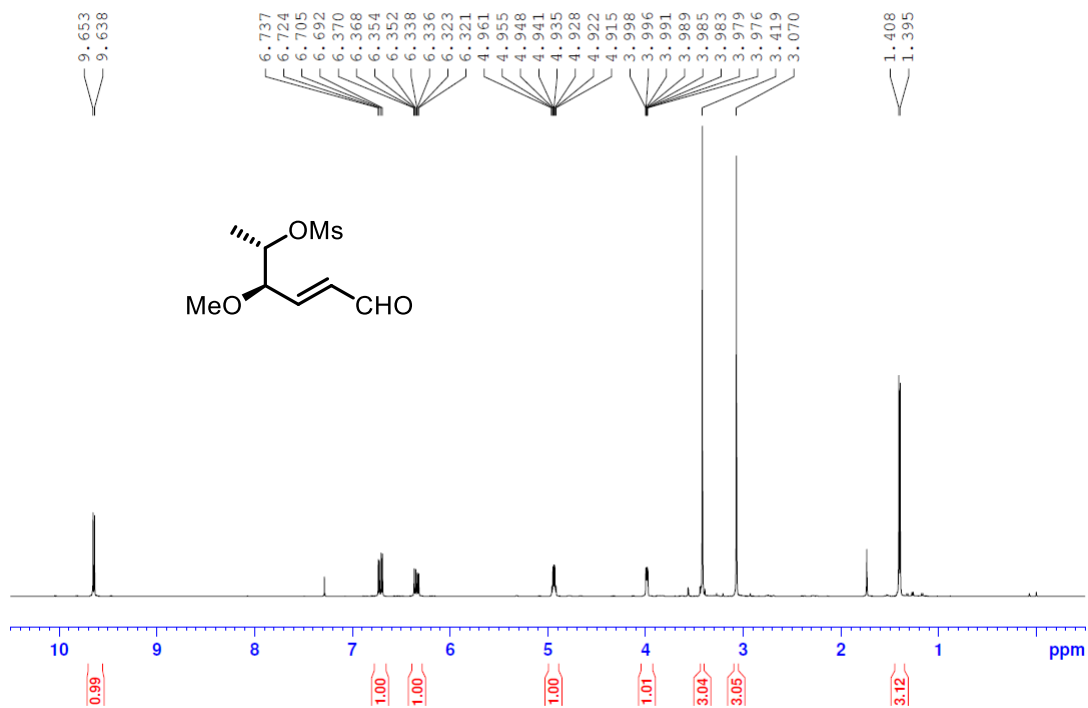

R6-113-1, 13C, AV500, CDCl3, May-14

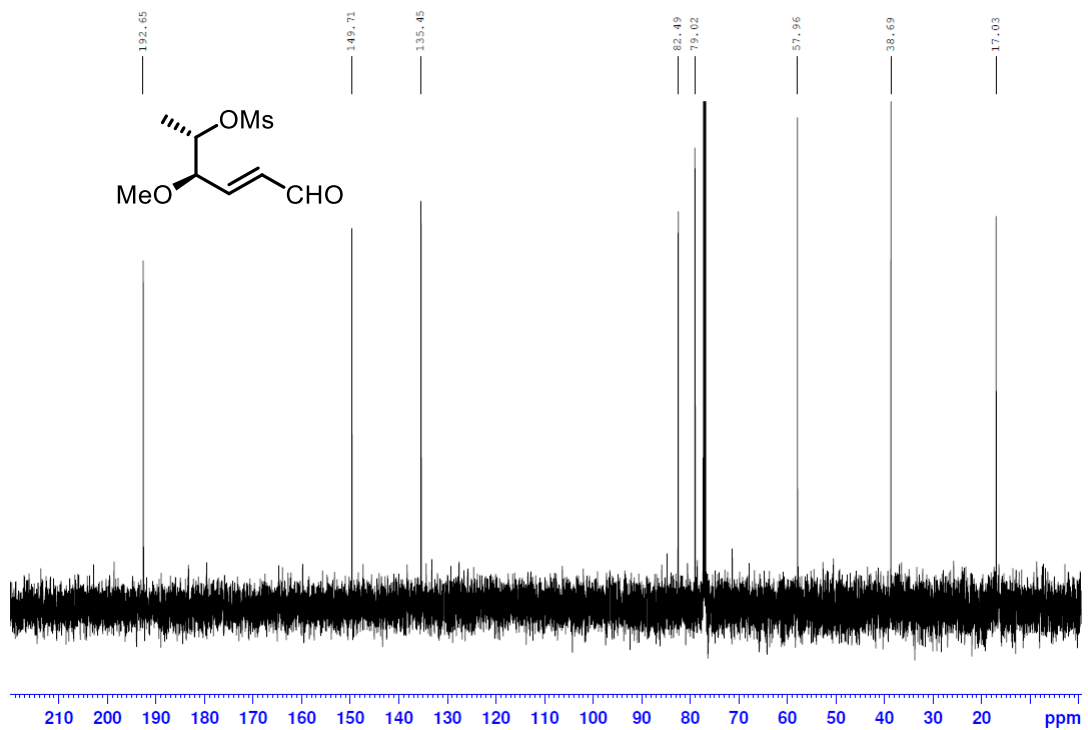

R8-041-2, 1H, BBFO1400, CDCl3, Jun-15

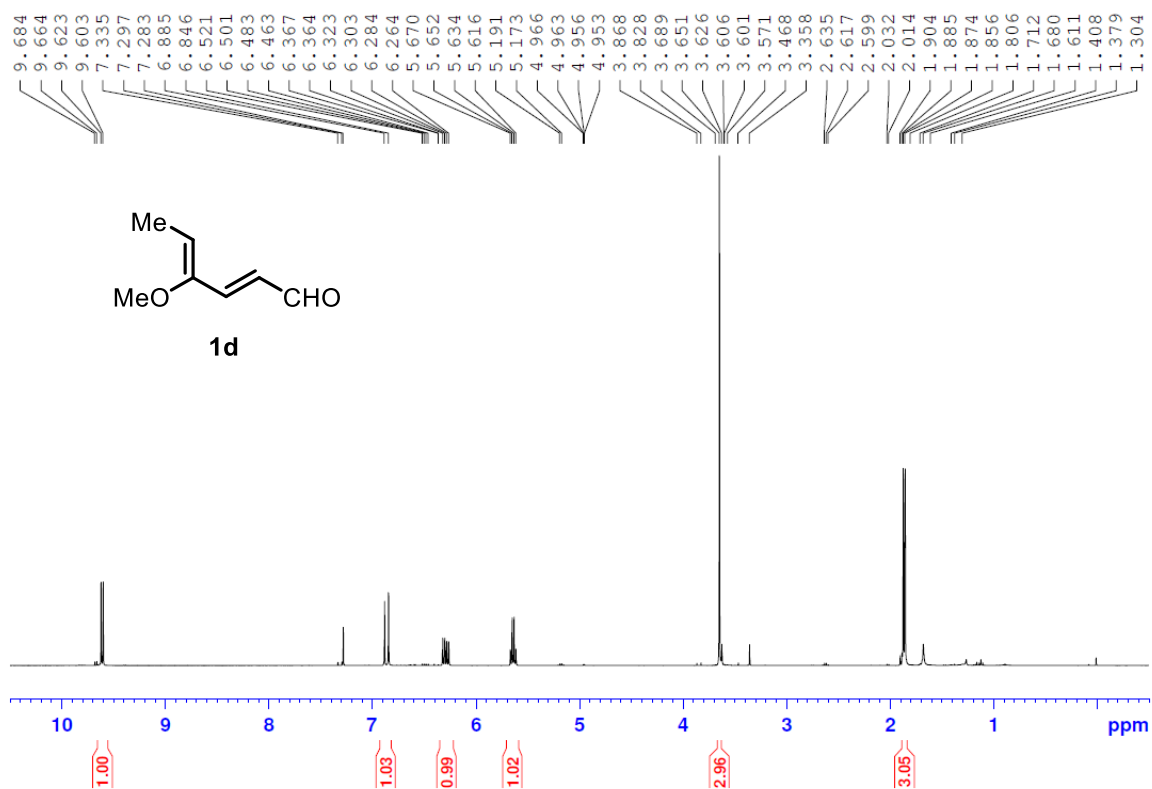

R8-041-2, 13C, BBFO1400, CDCl3, Jun-15

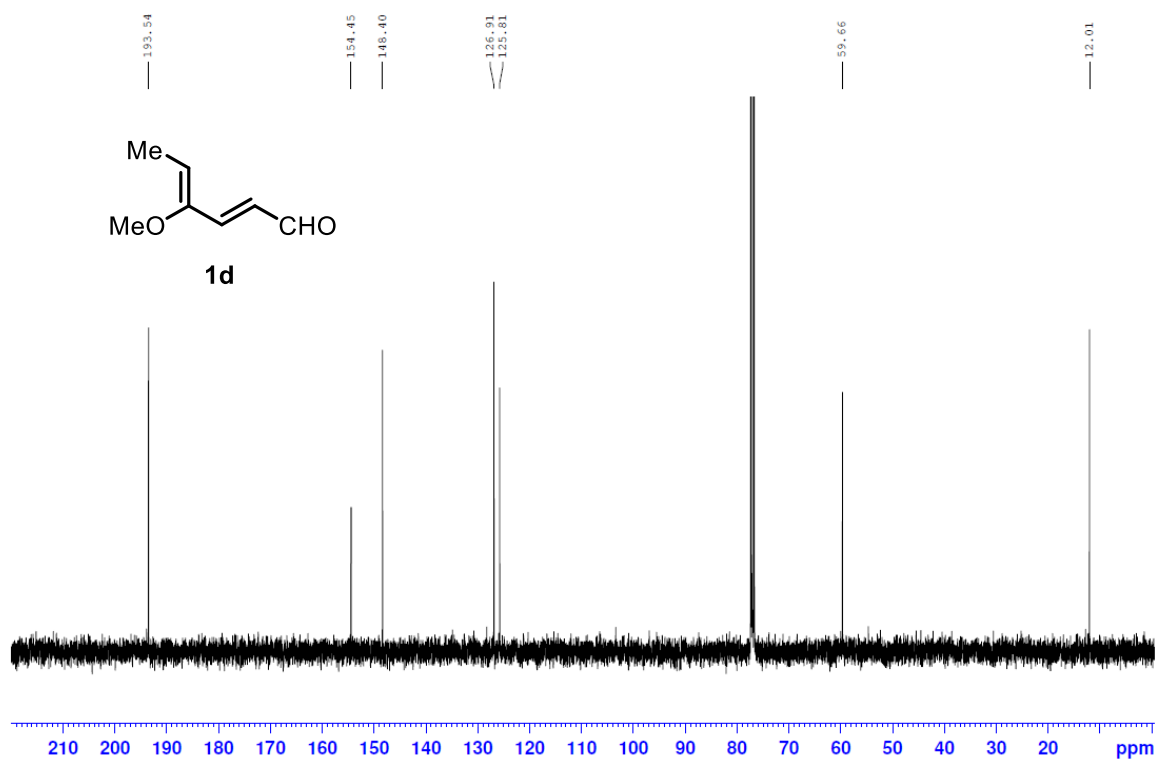

R6-114-1, <sup>1</sup>H, BBFO2 400, CDCl<sub>3</sub>, May-14

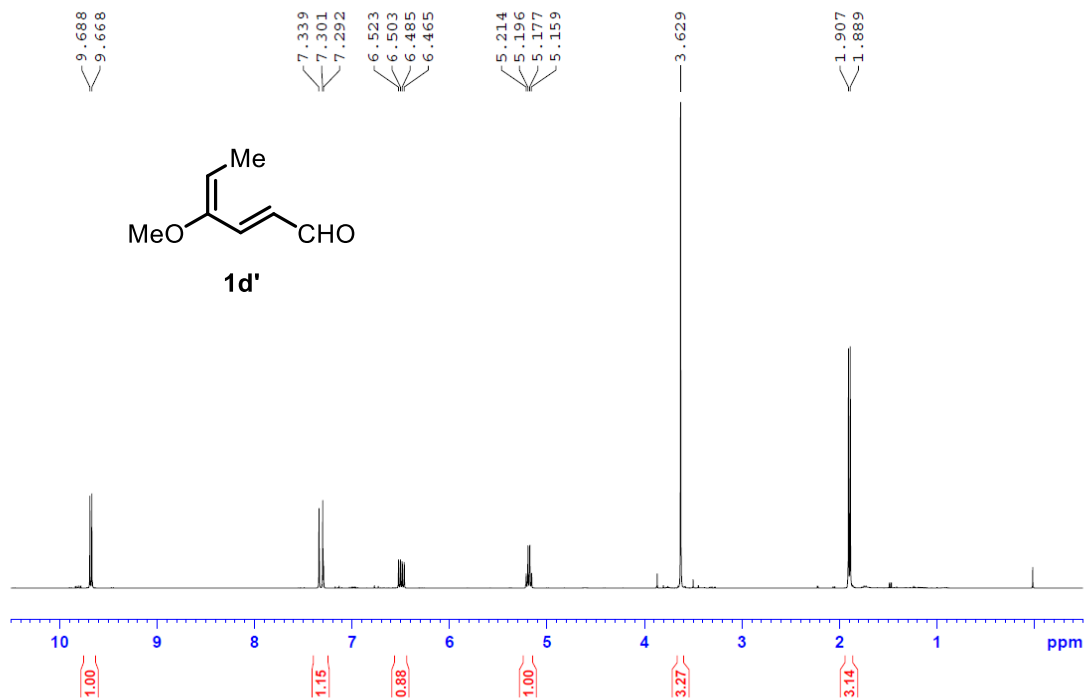

R6-114-1, <sup>13</sup>C, BBFO2 400, CDCl<sub>3</sub>, May-14

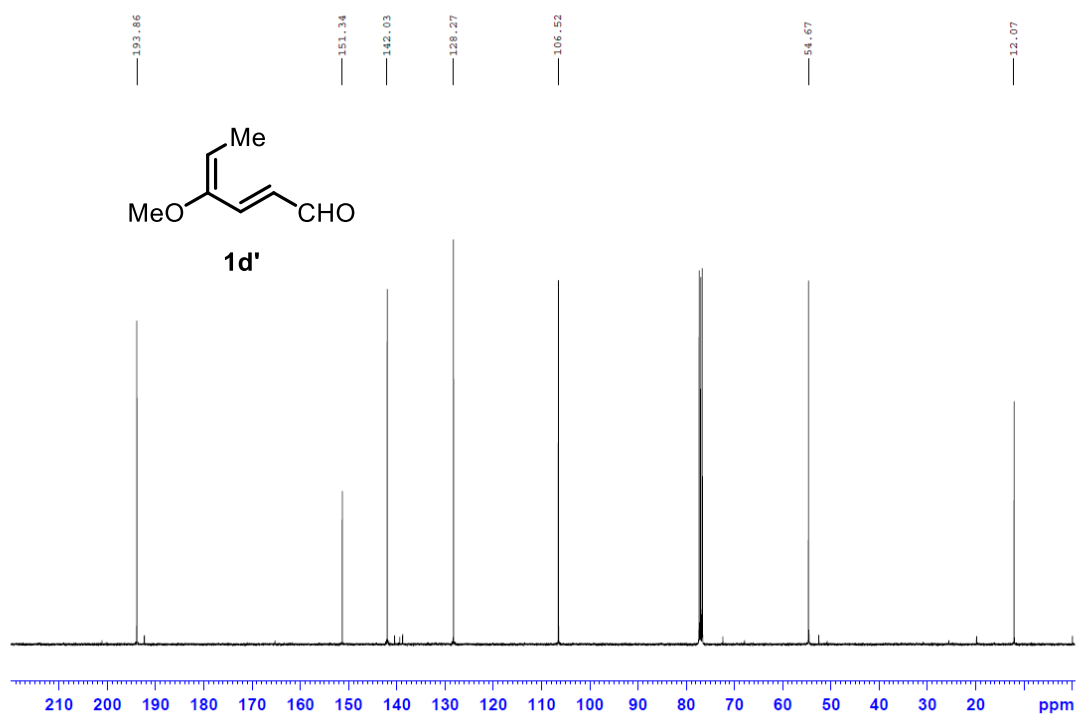

R6-055-p, 1H, BBF01400, CD3CN, Nov-2013

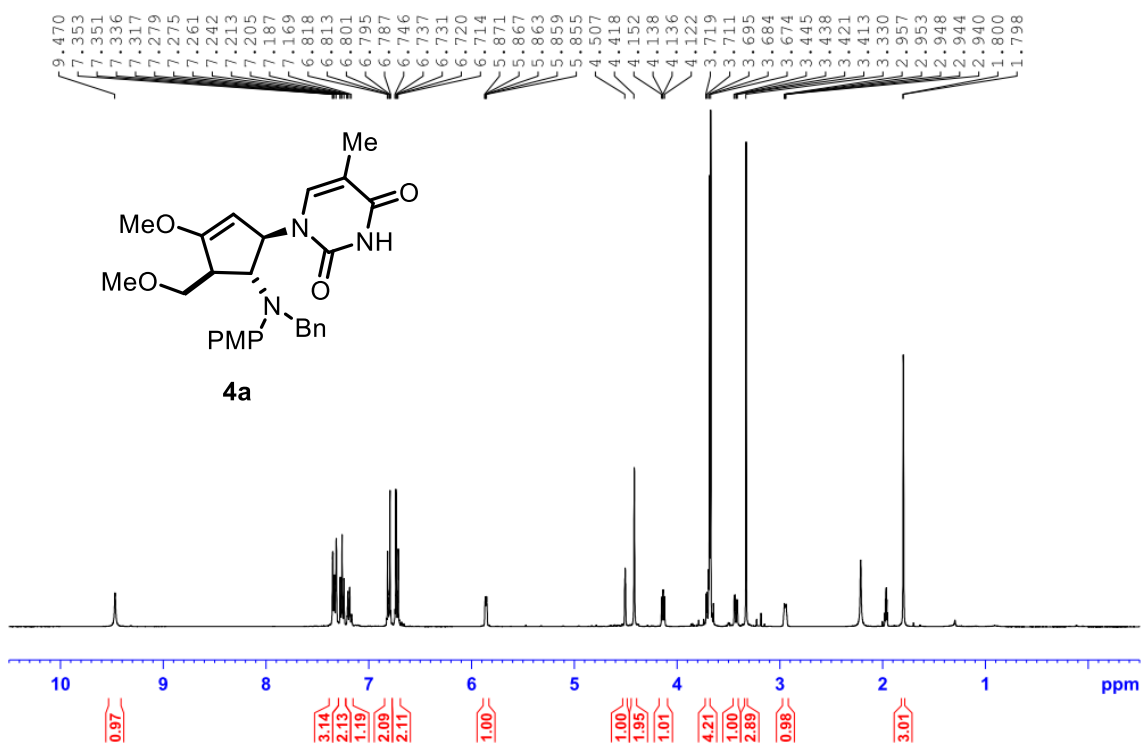

R6-055-p, 13C, BBF01400, CD3CN, Nov-2013

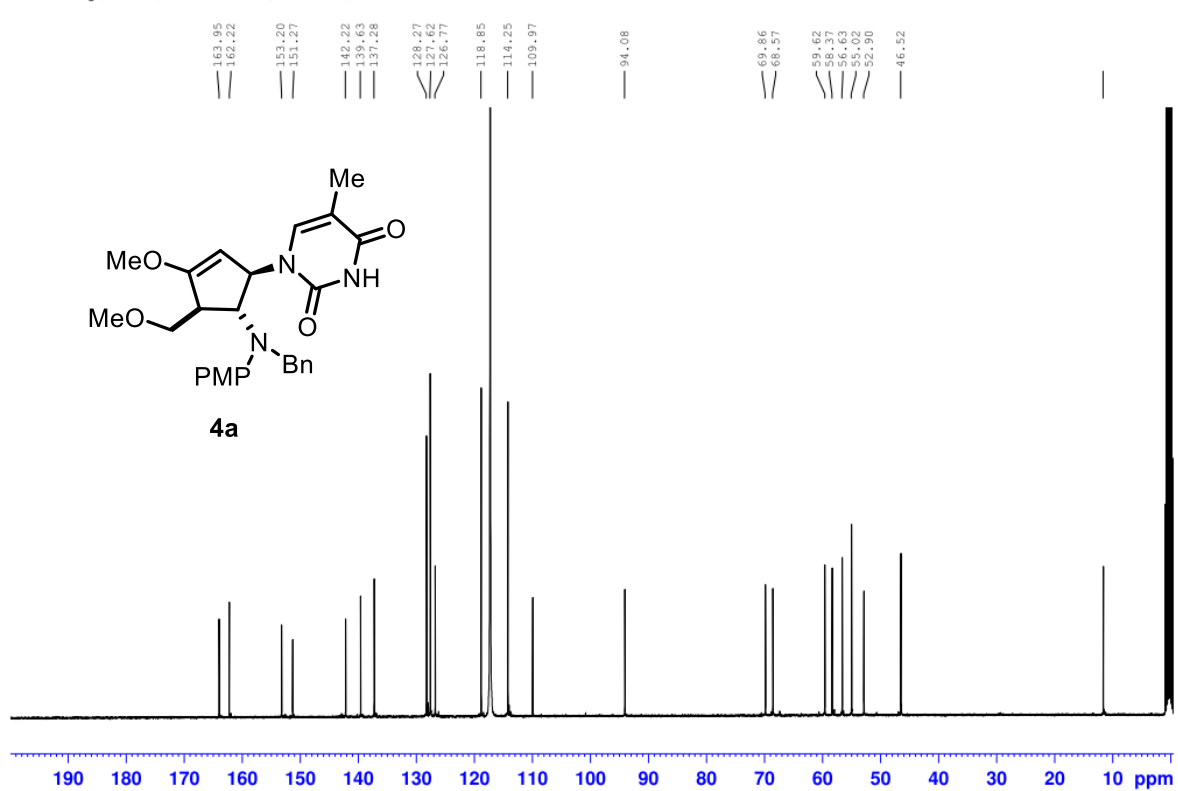



COSY of 4a

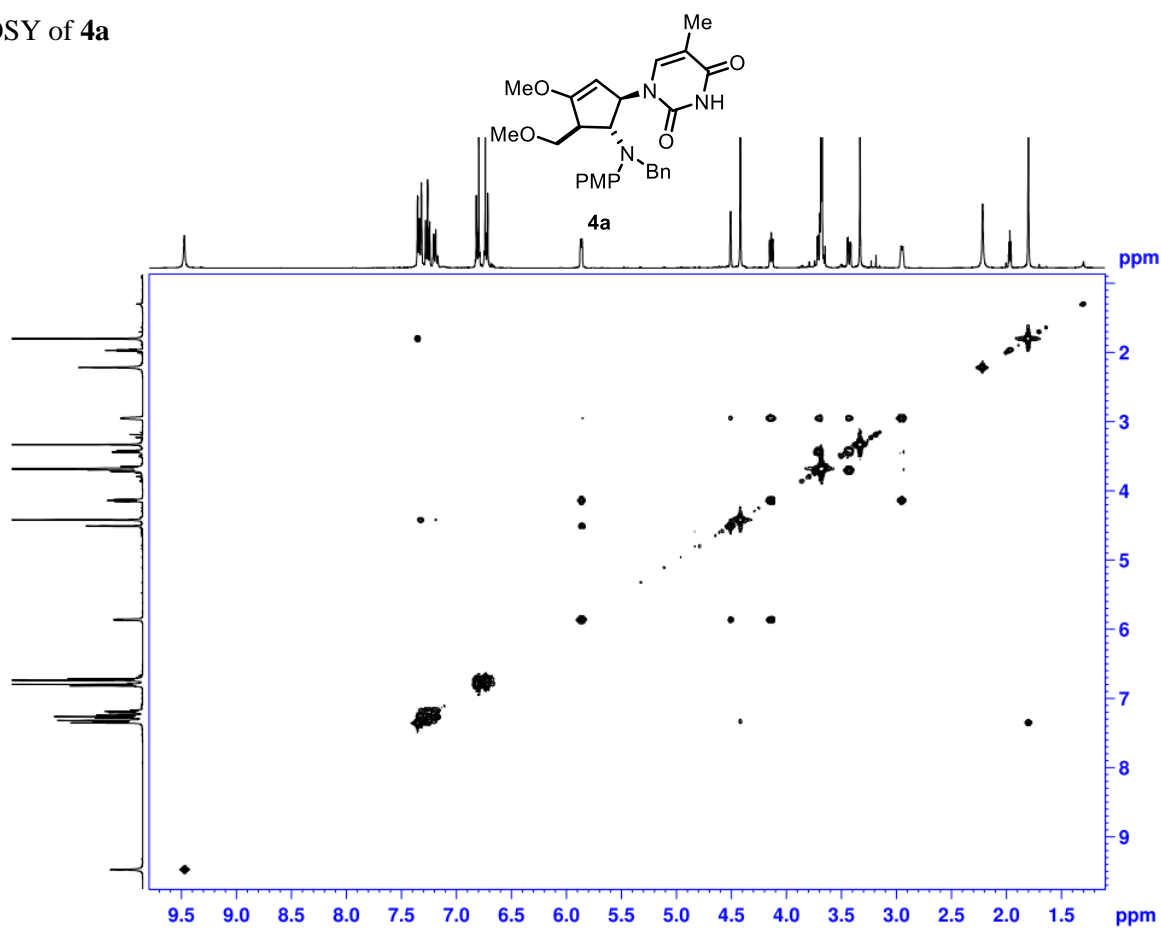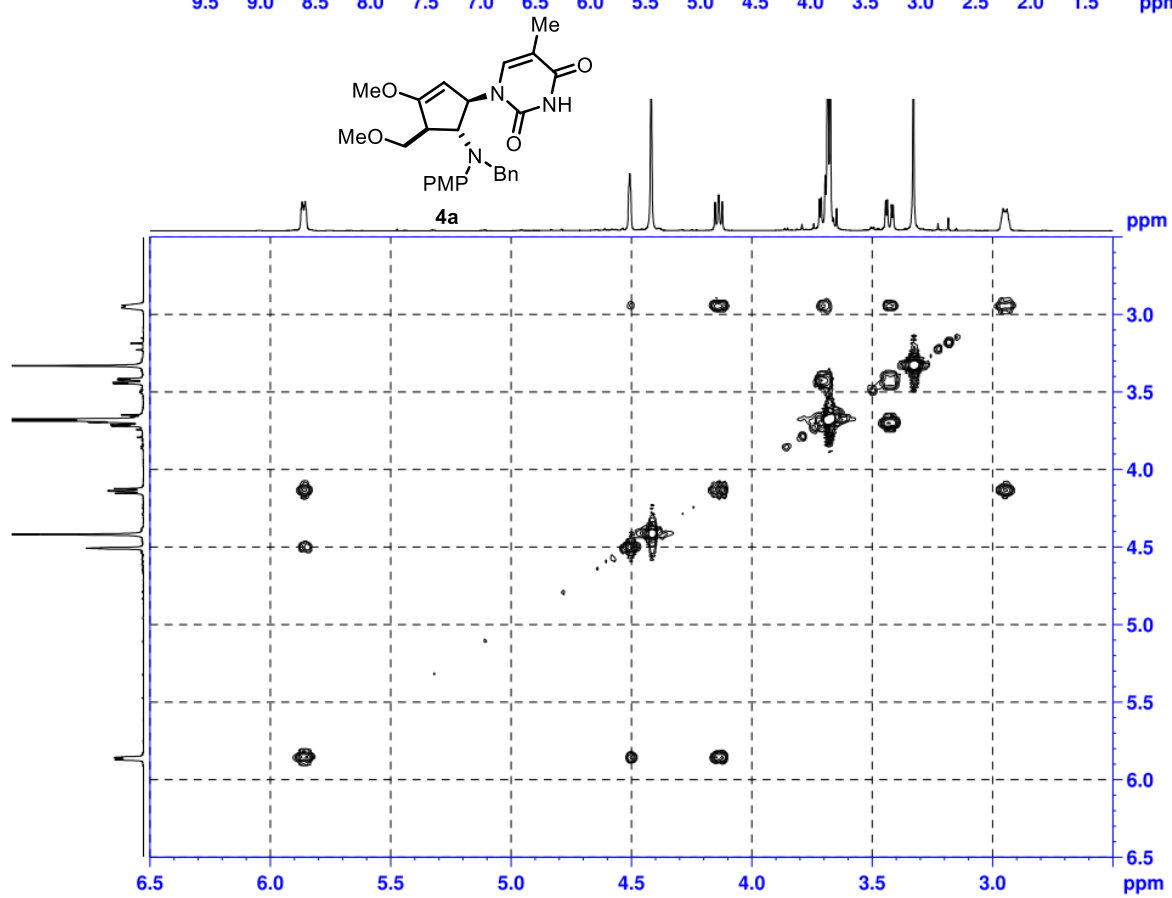

NOESY of 4a

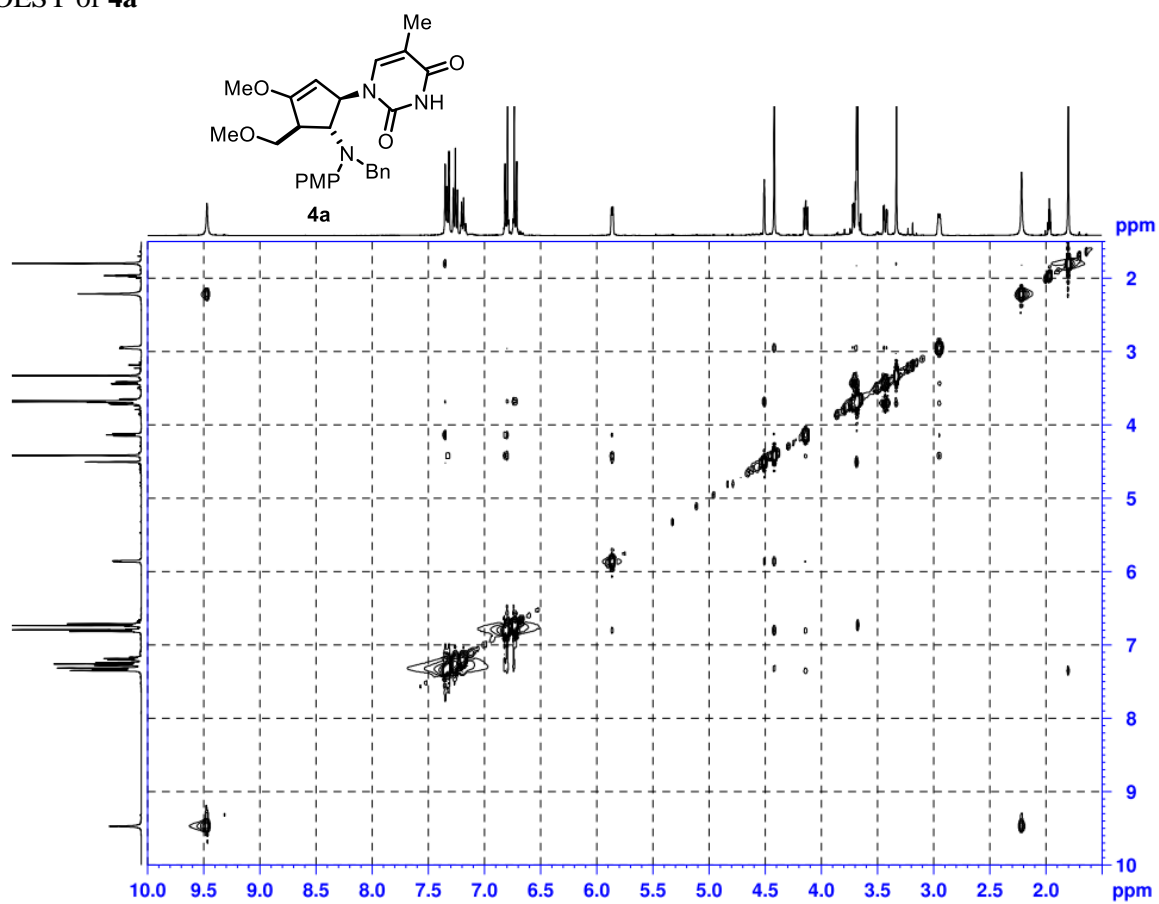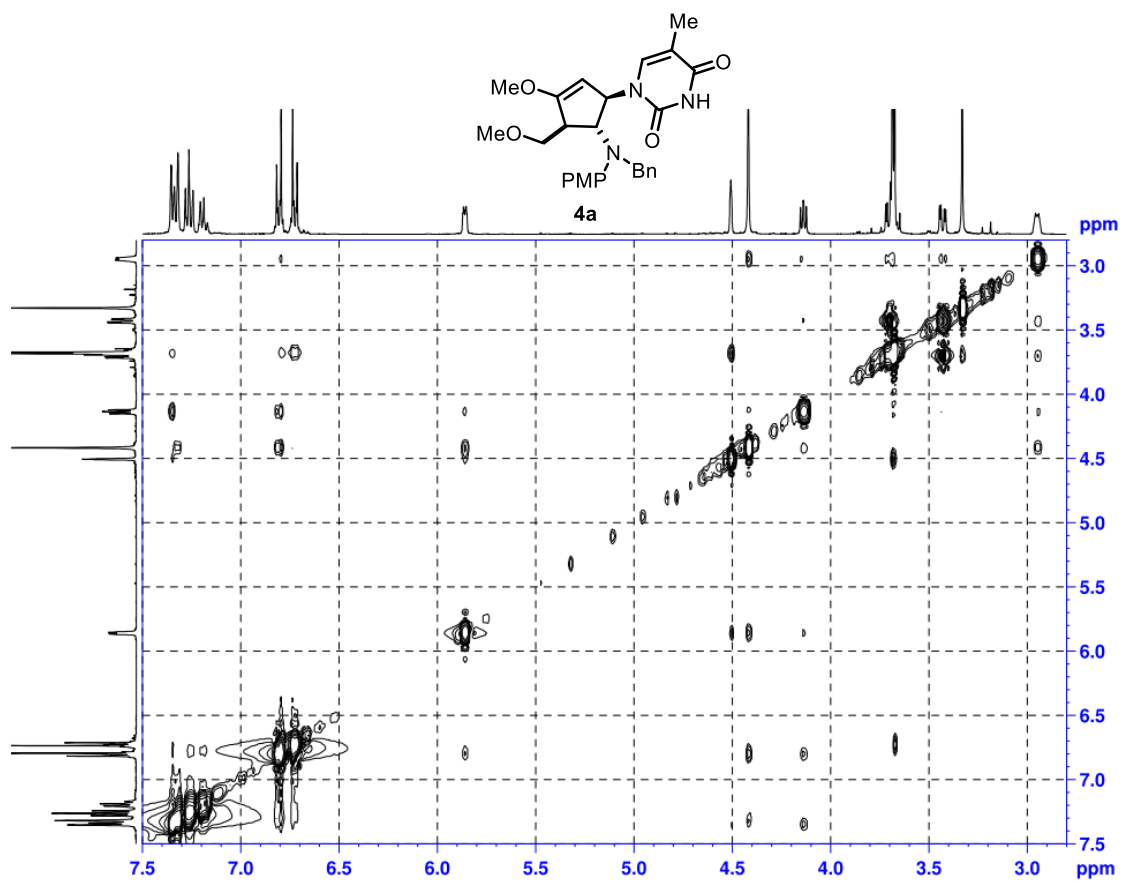

R6-058-1p, 1H, BBFO1400, CD3CN, Dec-2013

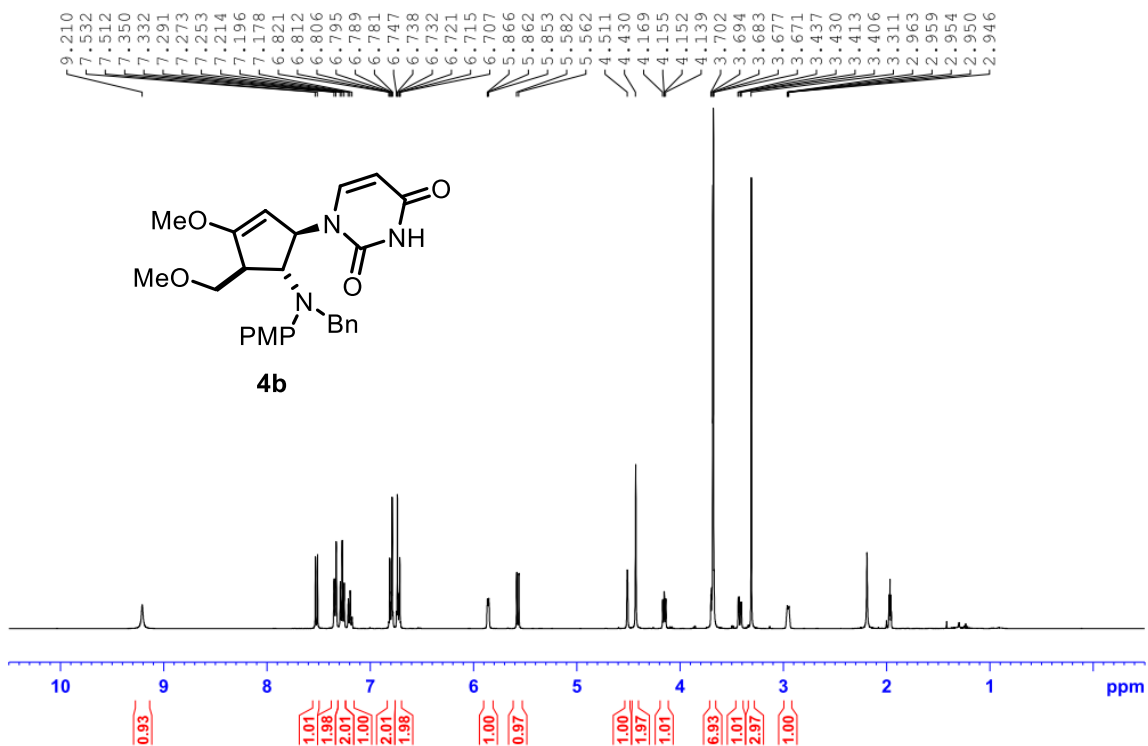

R6-058-1p, 13C, BBFO1400, CD3CN, Dec-2013

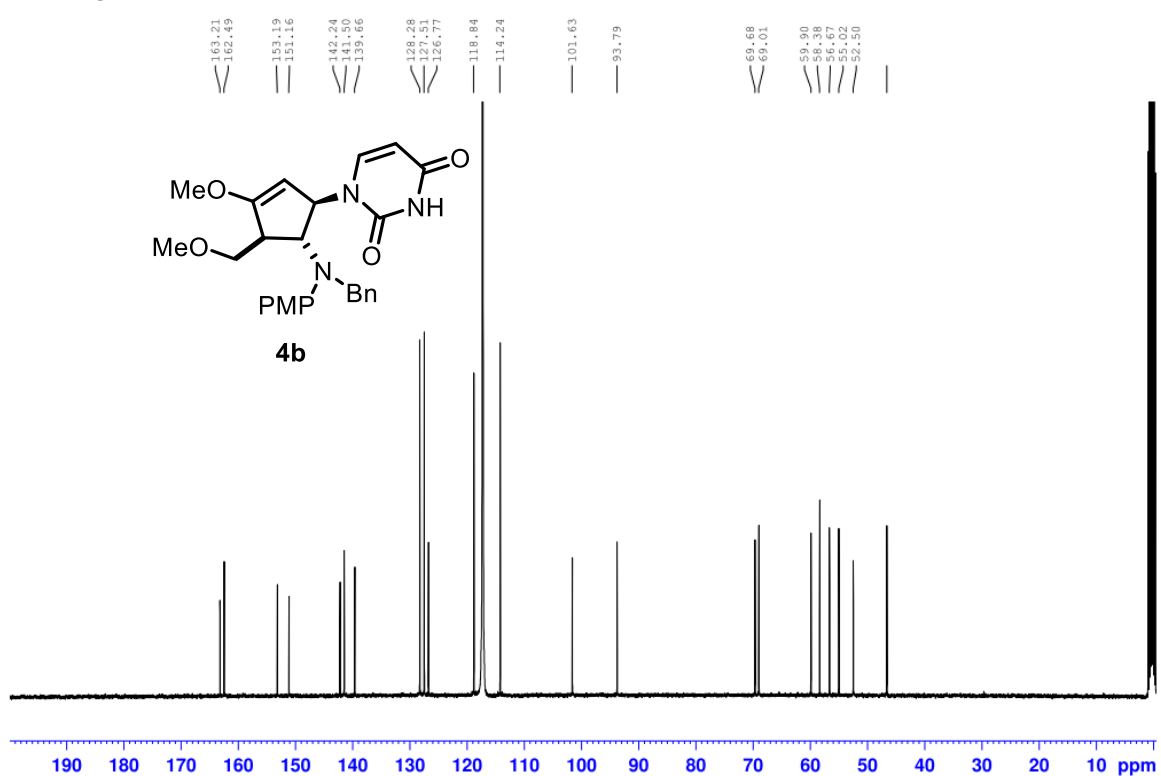

COSY of **4b**

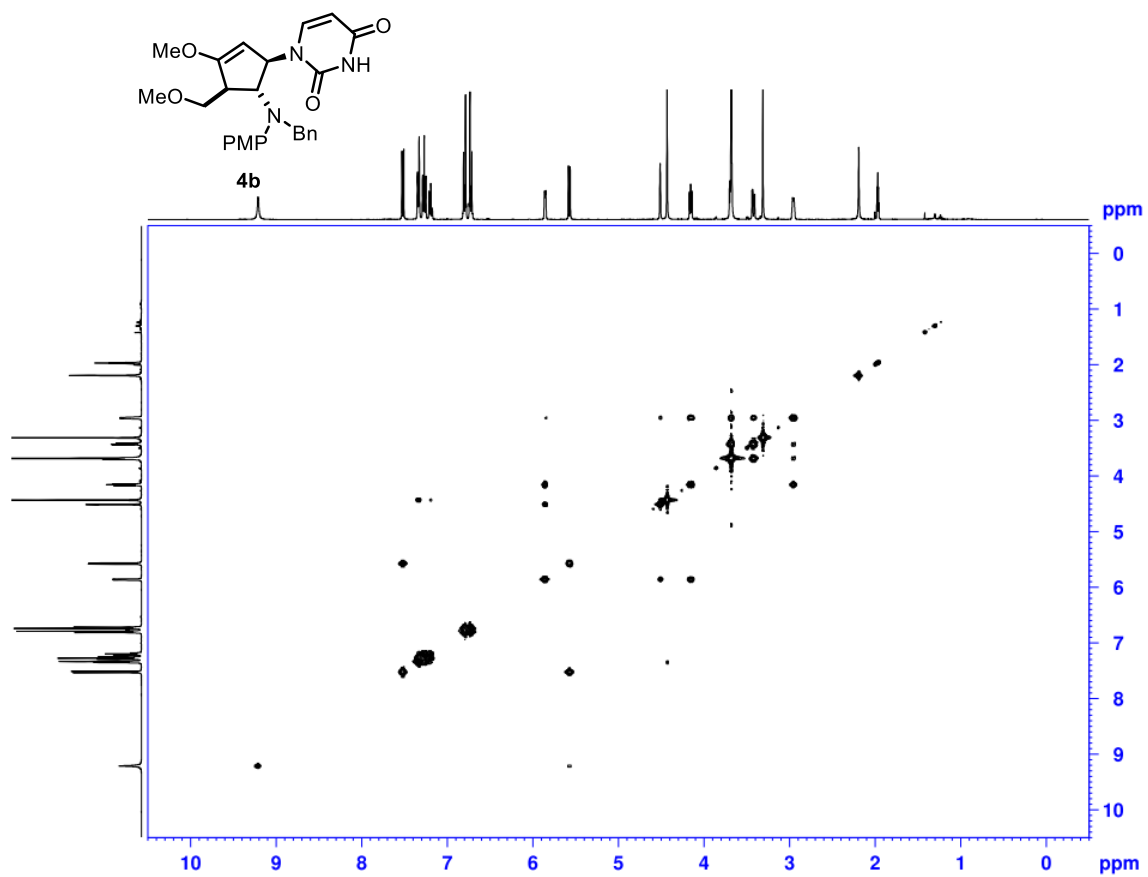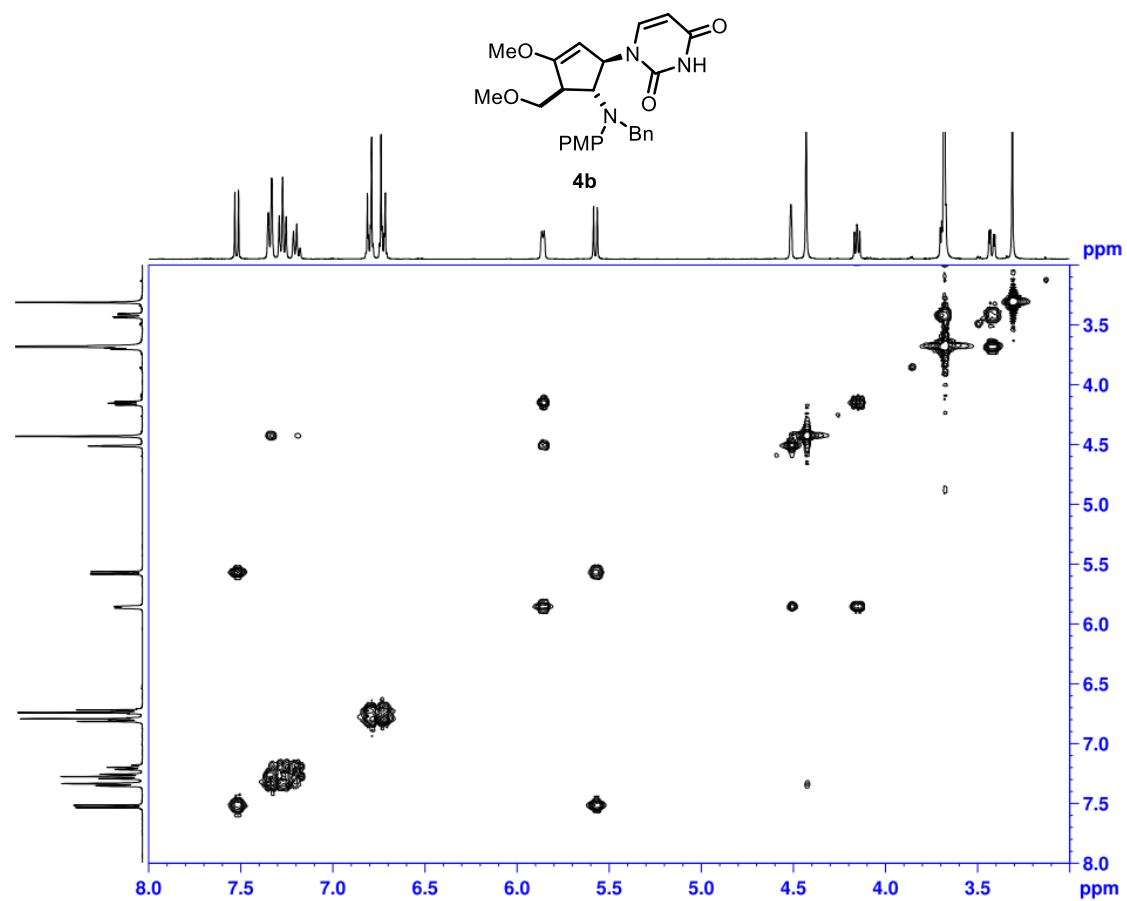

NOESY of **4b**

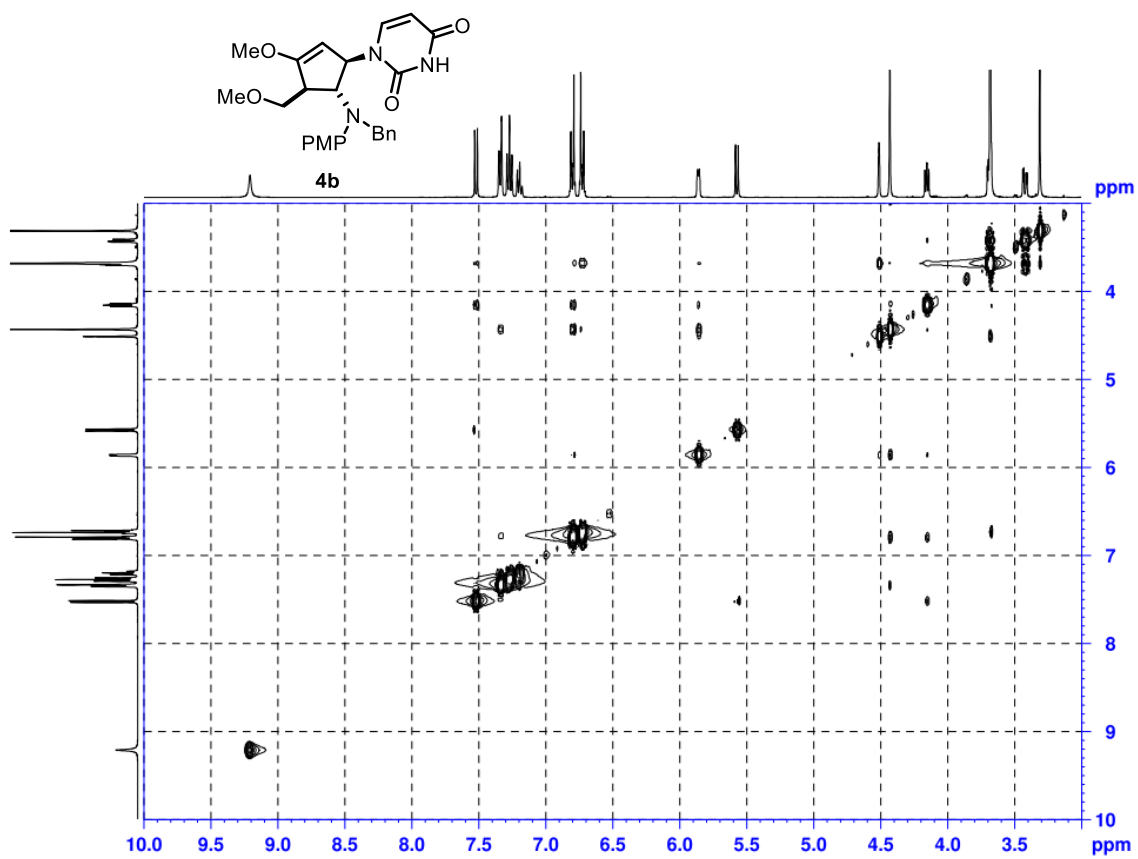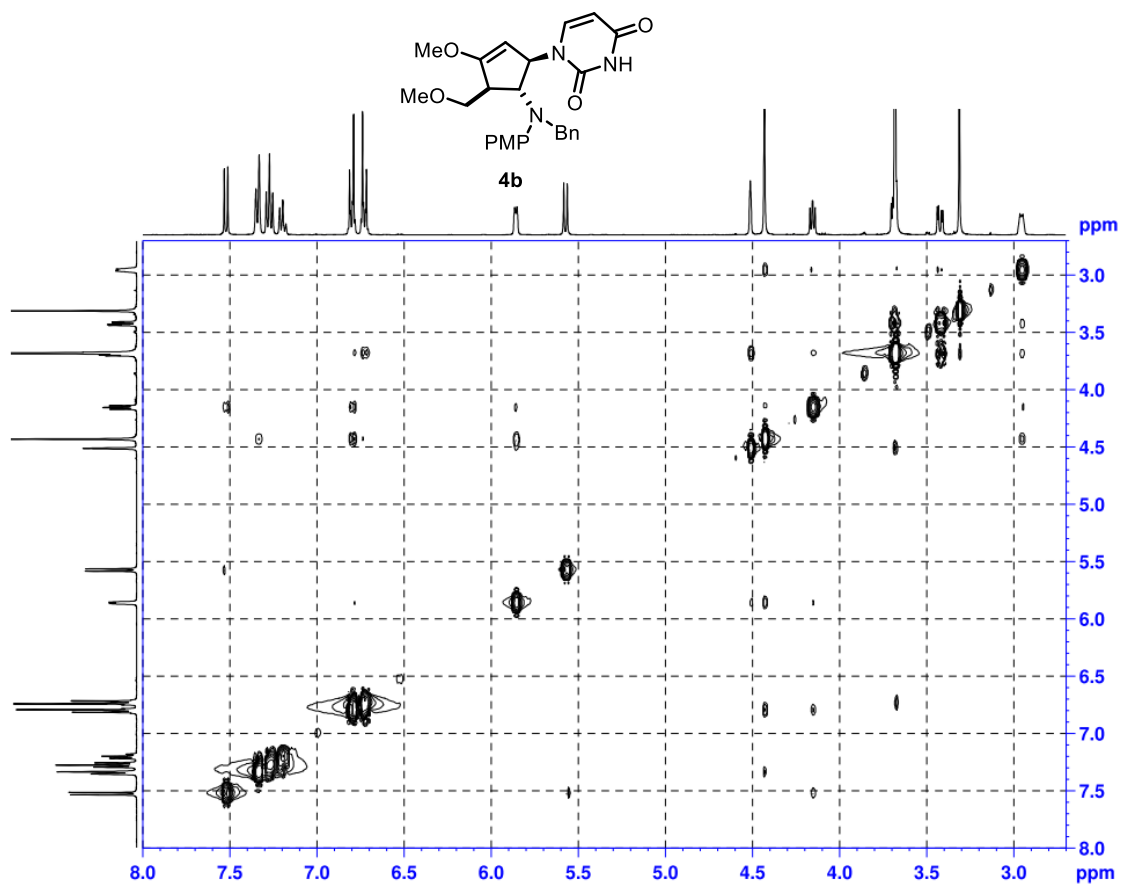

R6-116-p, BBF01AV400, 1H NMR, CD3CN, May-2014

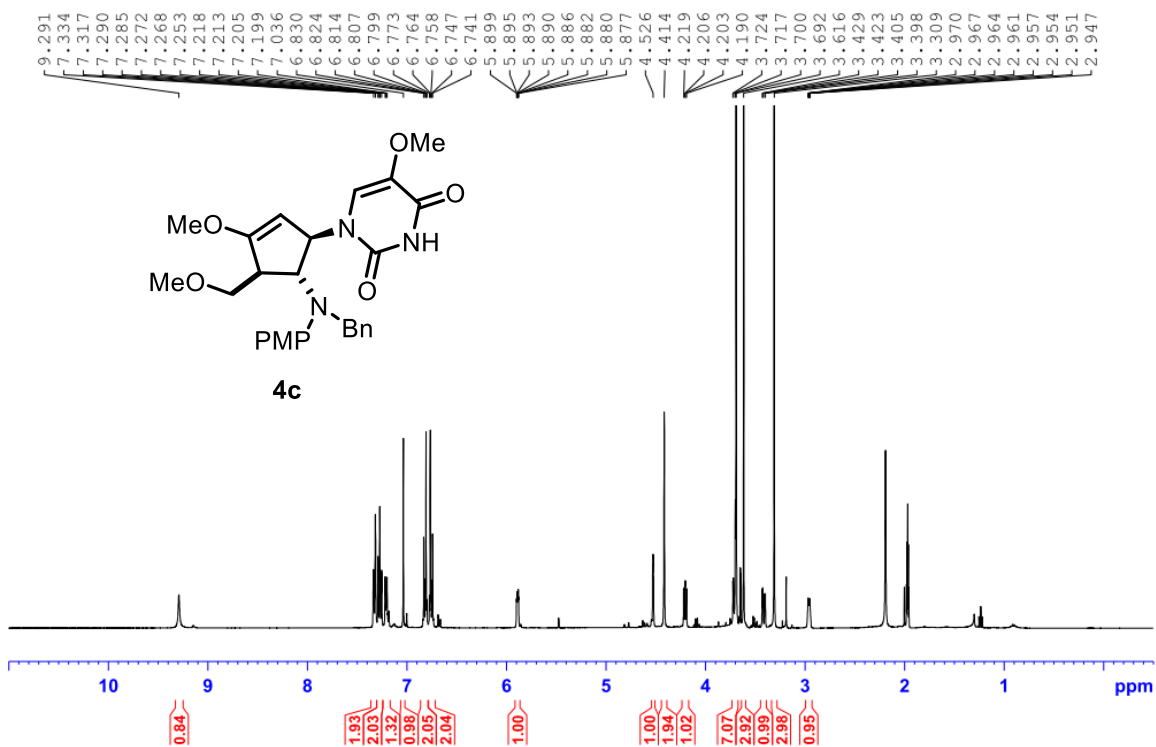

R6-116-p, BBF01AV400, 13C NMR, CD3CN, May-2014

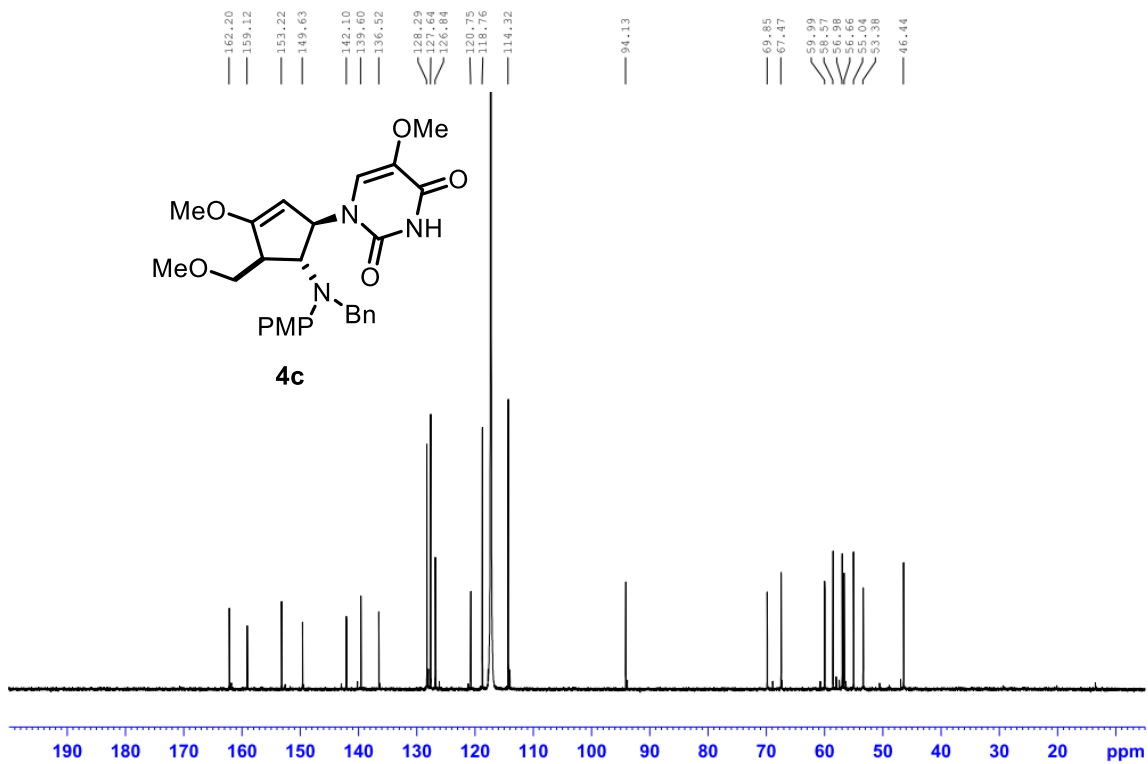

R6-081-p, 1H, BBFO2 400, CD3CN, Apr-14

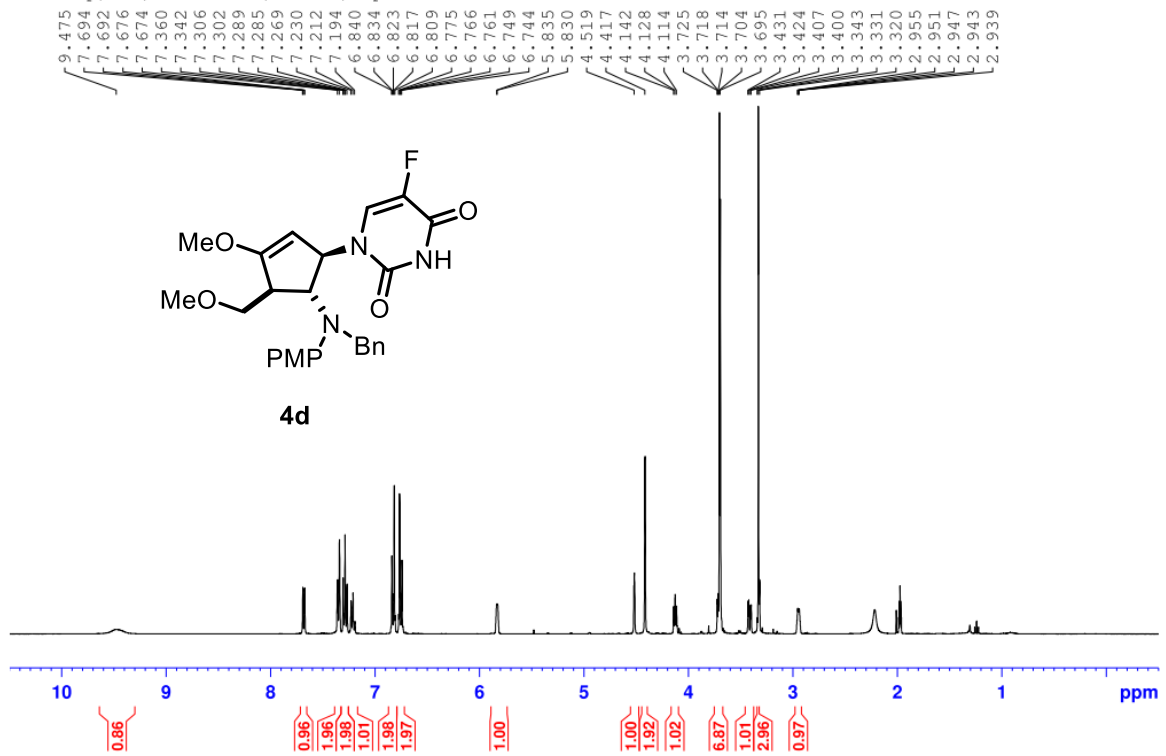

R6-081-p, 13C, BBFO2 400, CD3CN, Apr-14

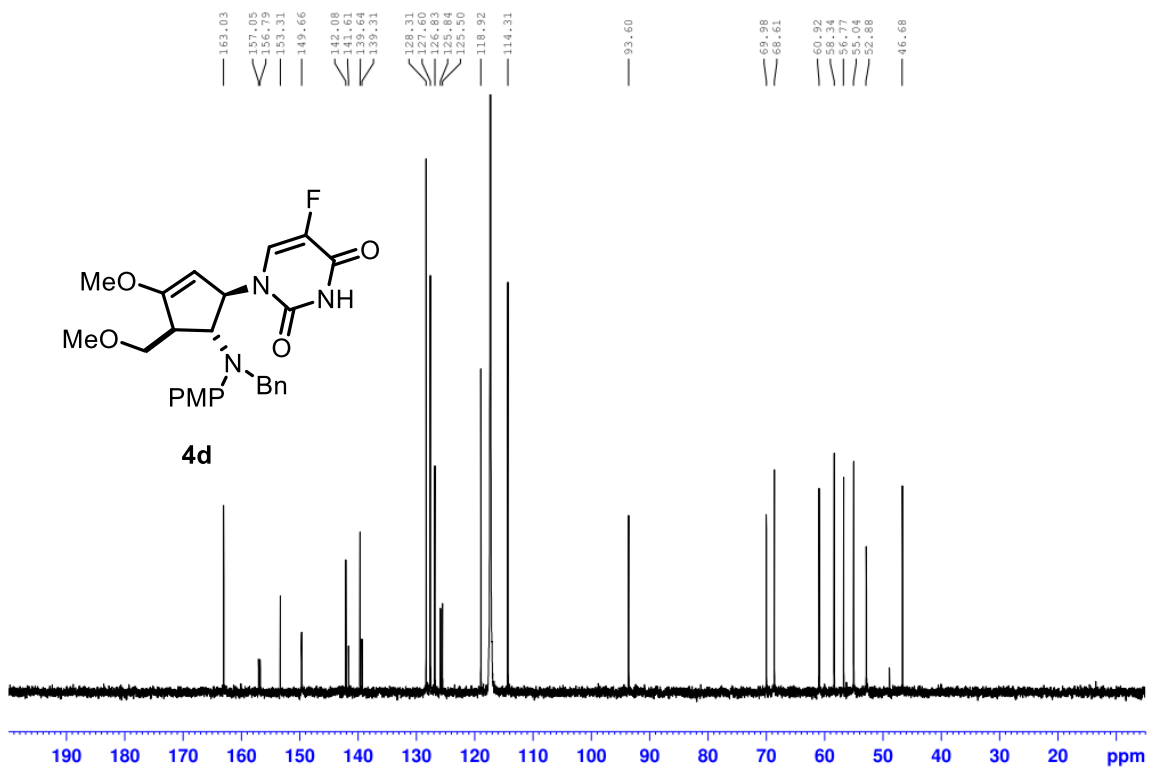

R6-089-p, 1H, BBFO2 400, CD3CN, Apr-14

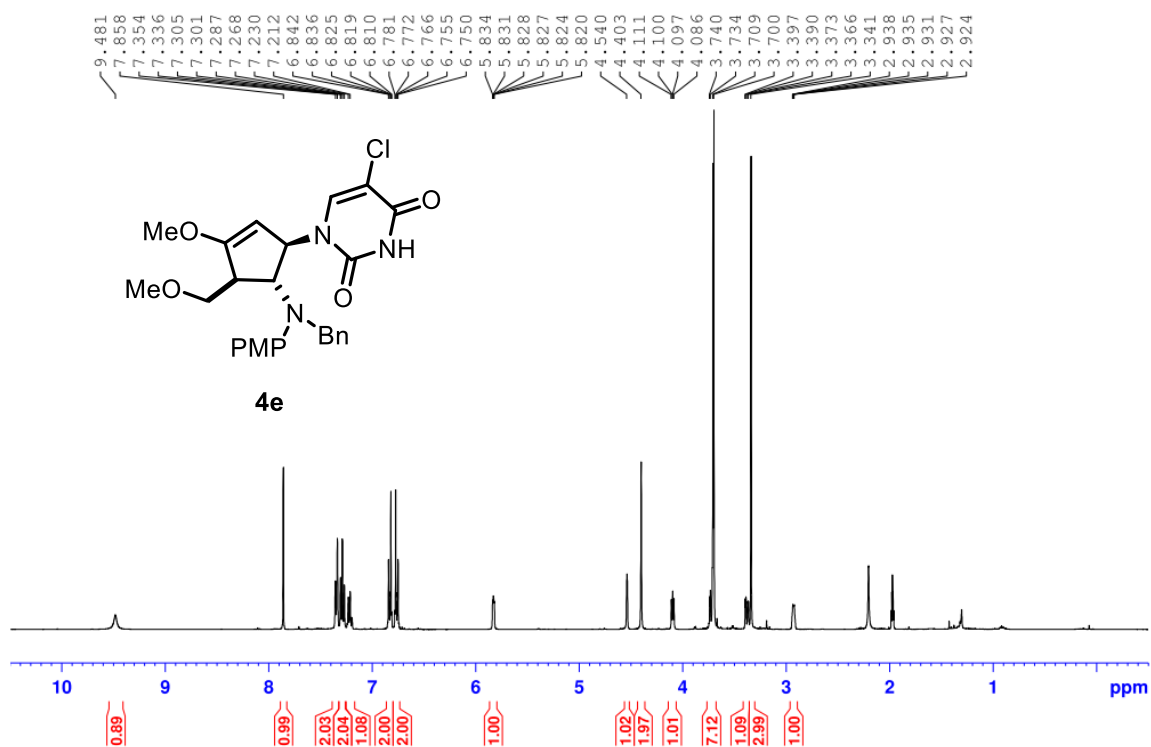

R6-089-p, 13C, BBFO2 400, CD3CN, Apr-14

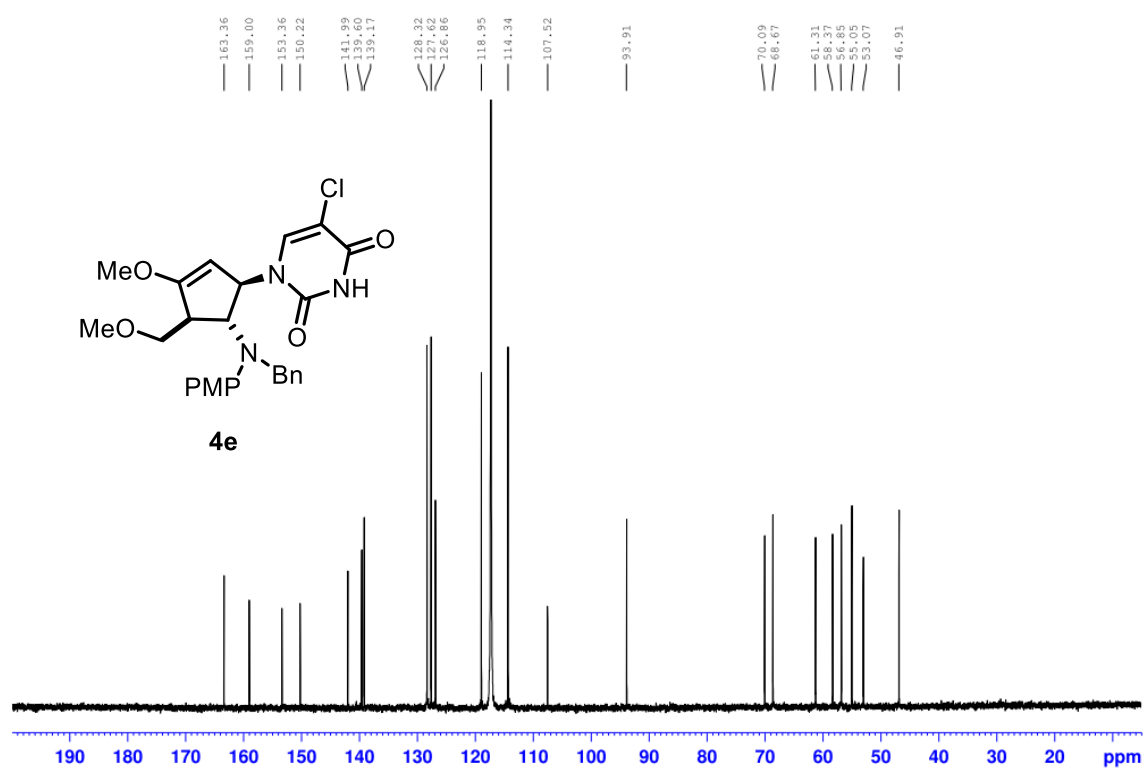



R6-082-p, 1H, BBFO2 400, CD3CN, Apr-14

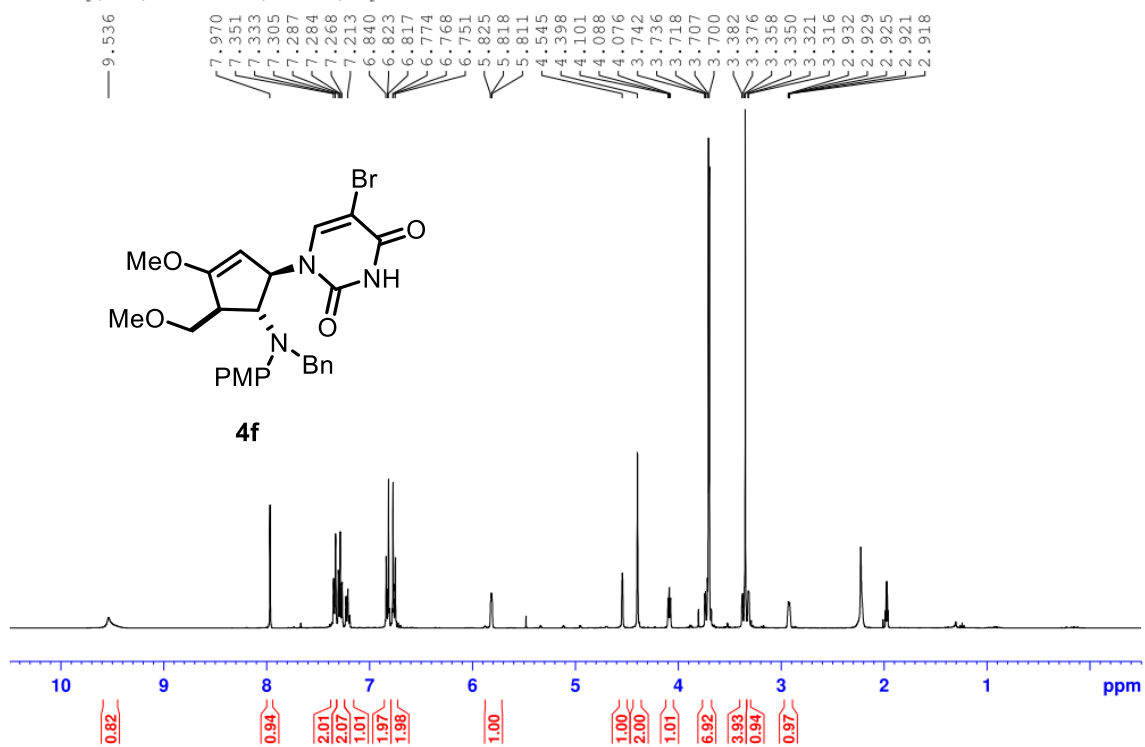

R6-082-p, 13C, BBFO2 400, CD3CN, Apr-14

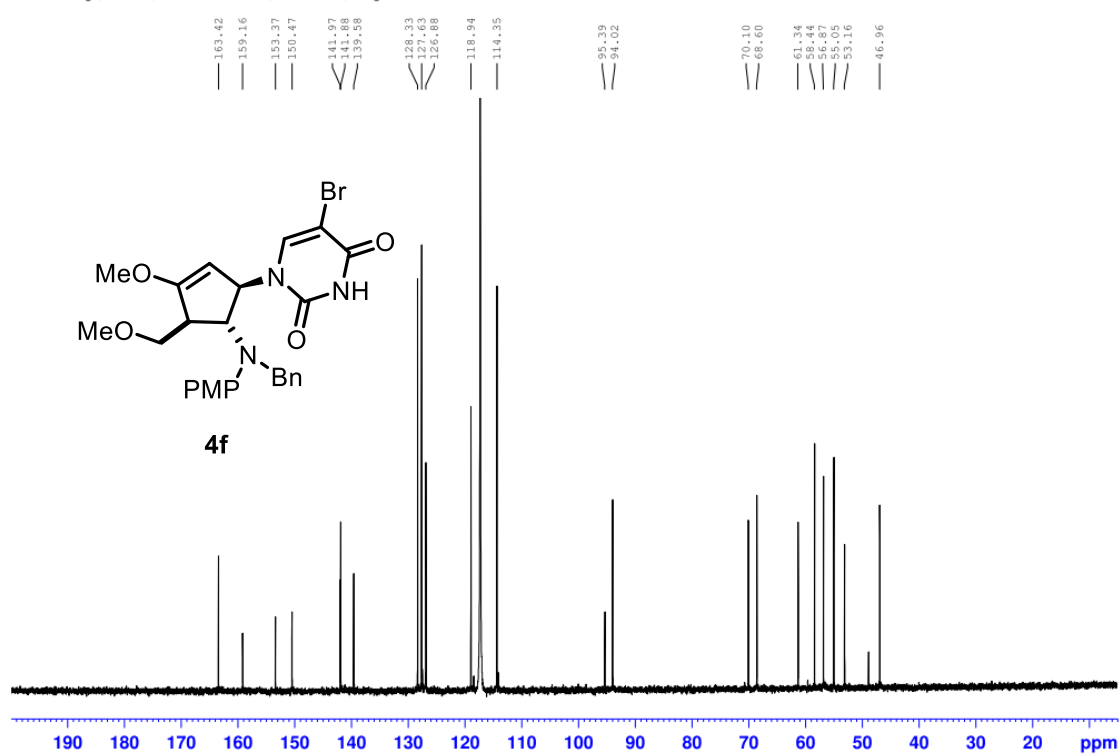

R6-080-1p, 1H, BBFO2 400, CDC13, Apr-14

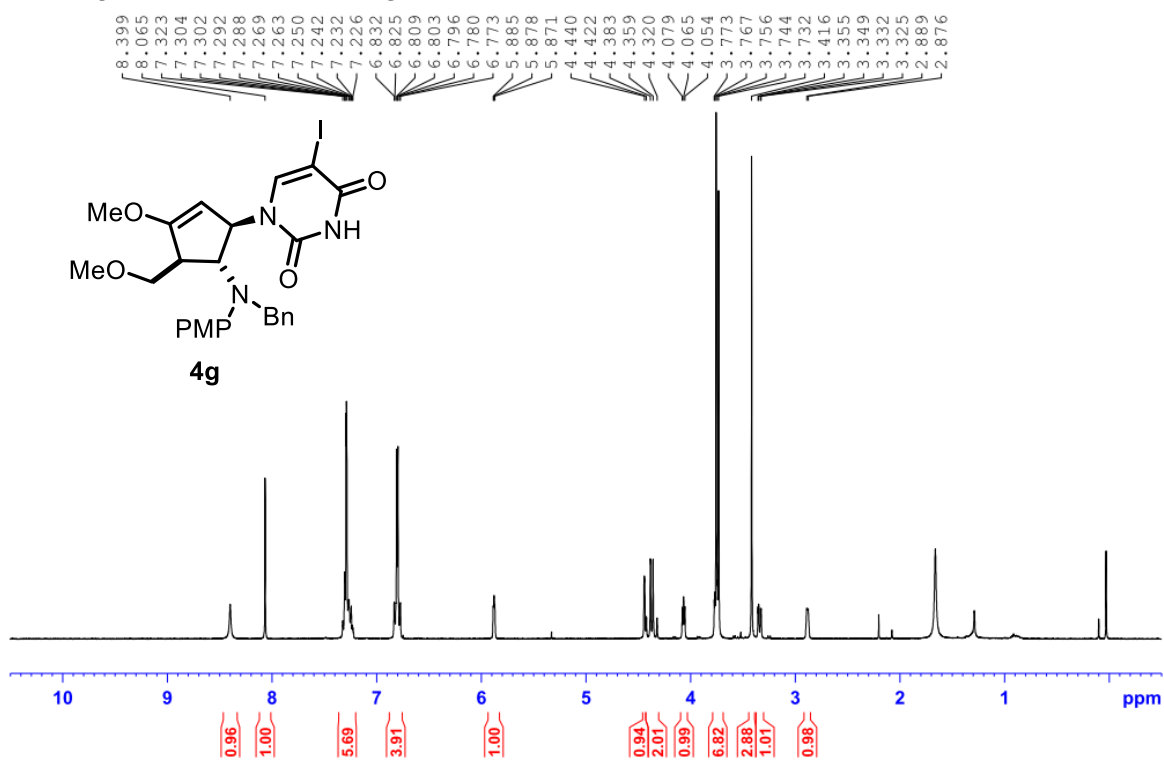

R6-080-1p, 13C, BBFO2 400, CDC13, Apr-14

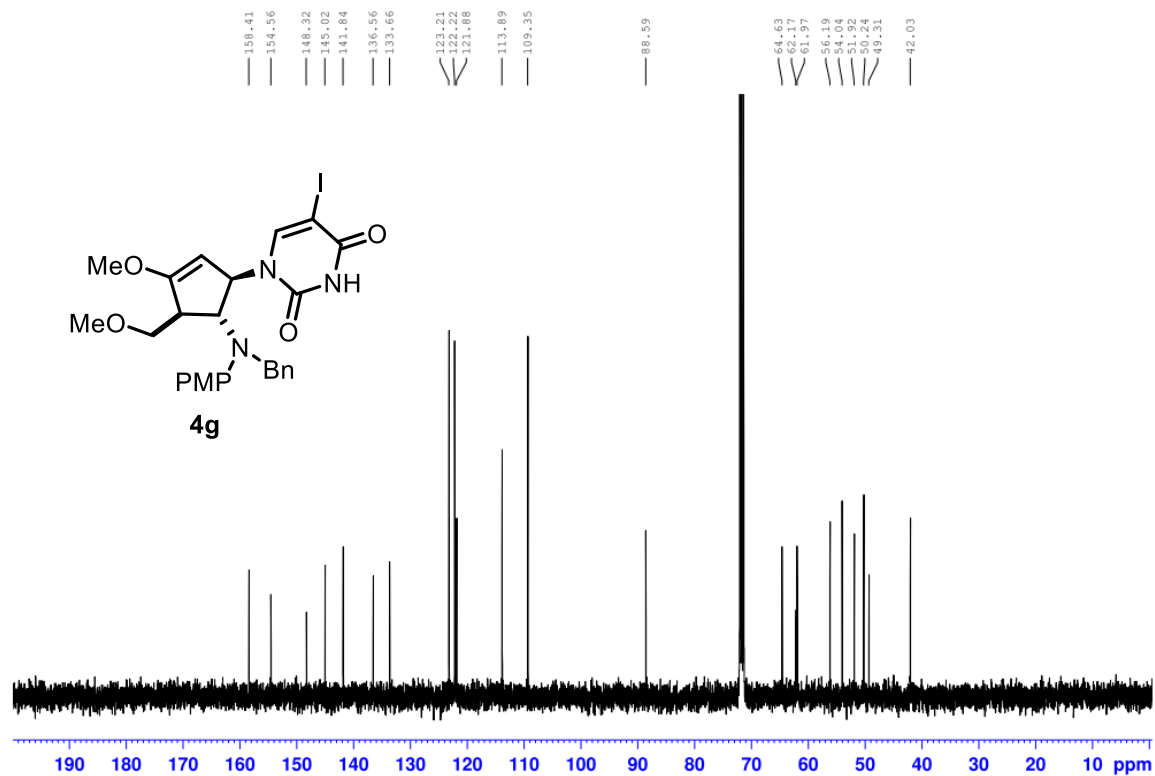

R6-139-1, 1H, BBFO1400, CD3CN, Jun-14

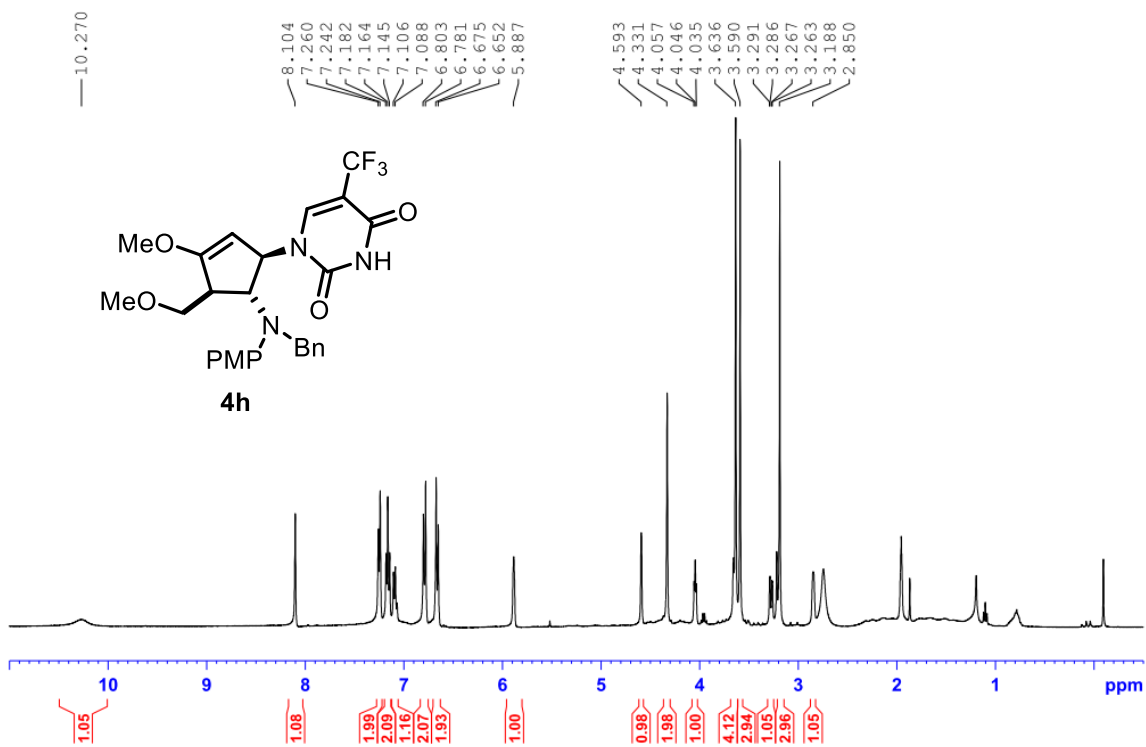

R6-139-1, 13C, BBFO1400, CD3CN, Jun-14

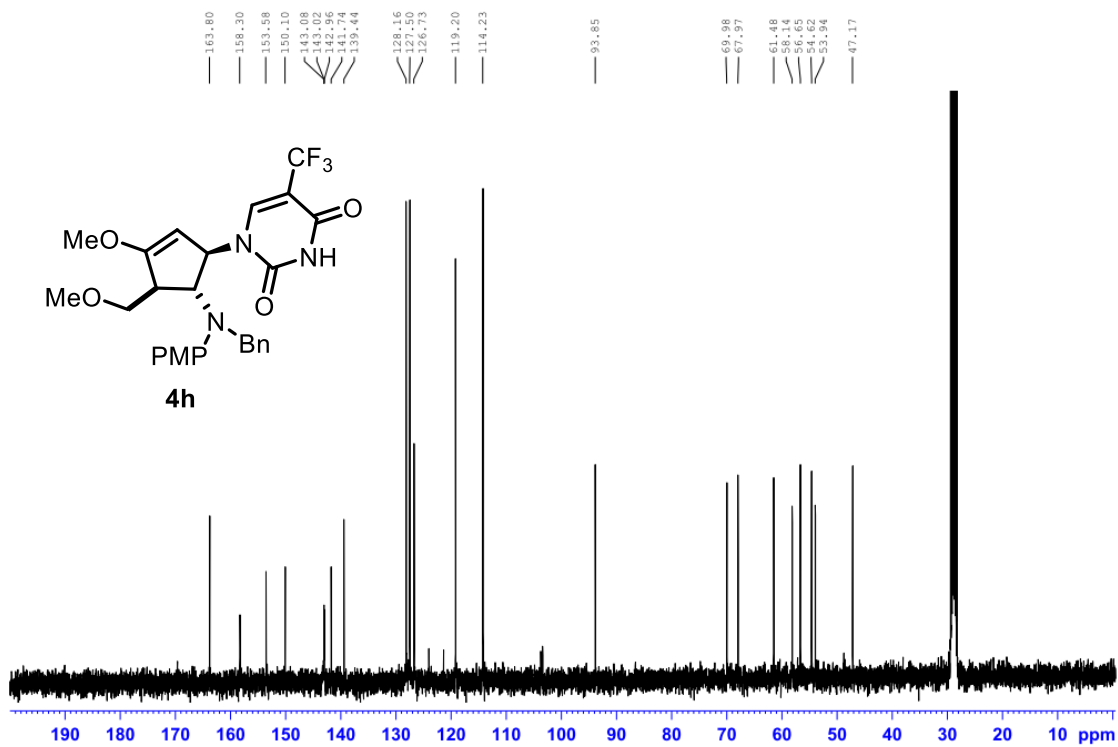

R6-083-p, 1H, BBFO2 400, CD3CN, Apr-14

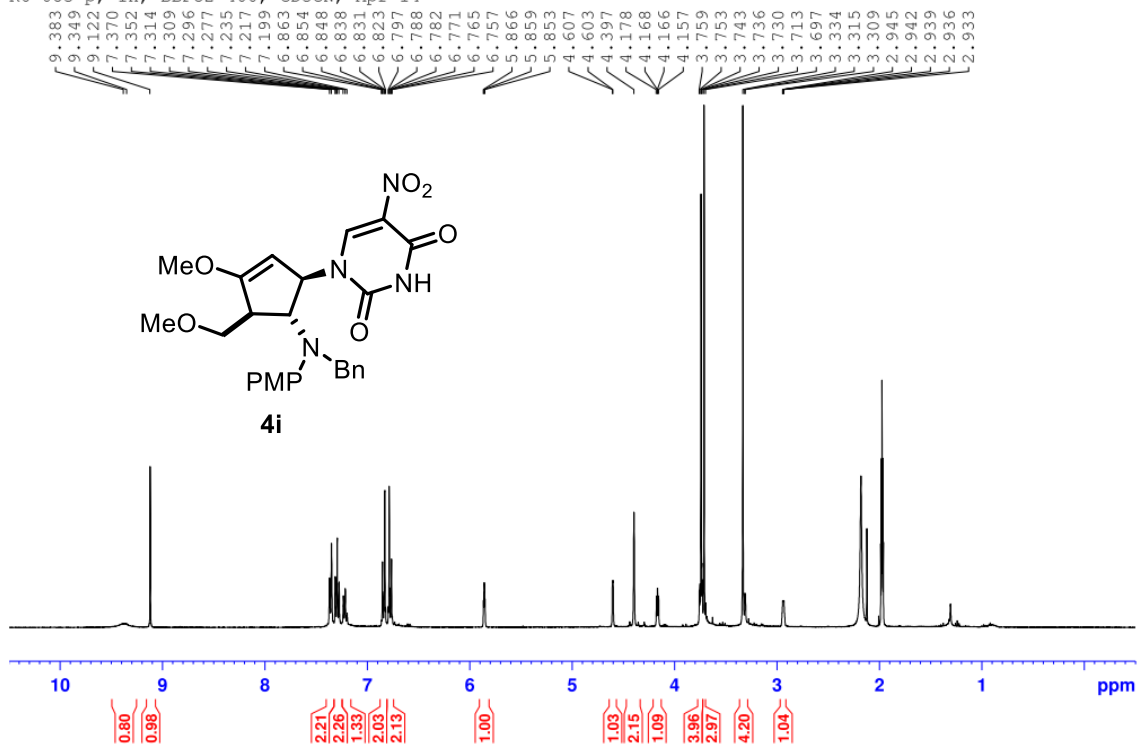

R6-083-p, 13C, BBFO2 400, CD3CN, Apr-14

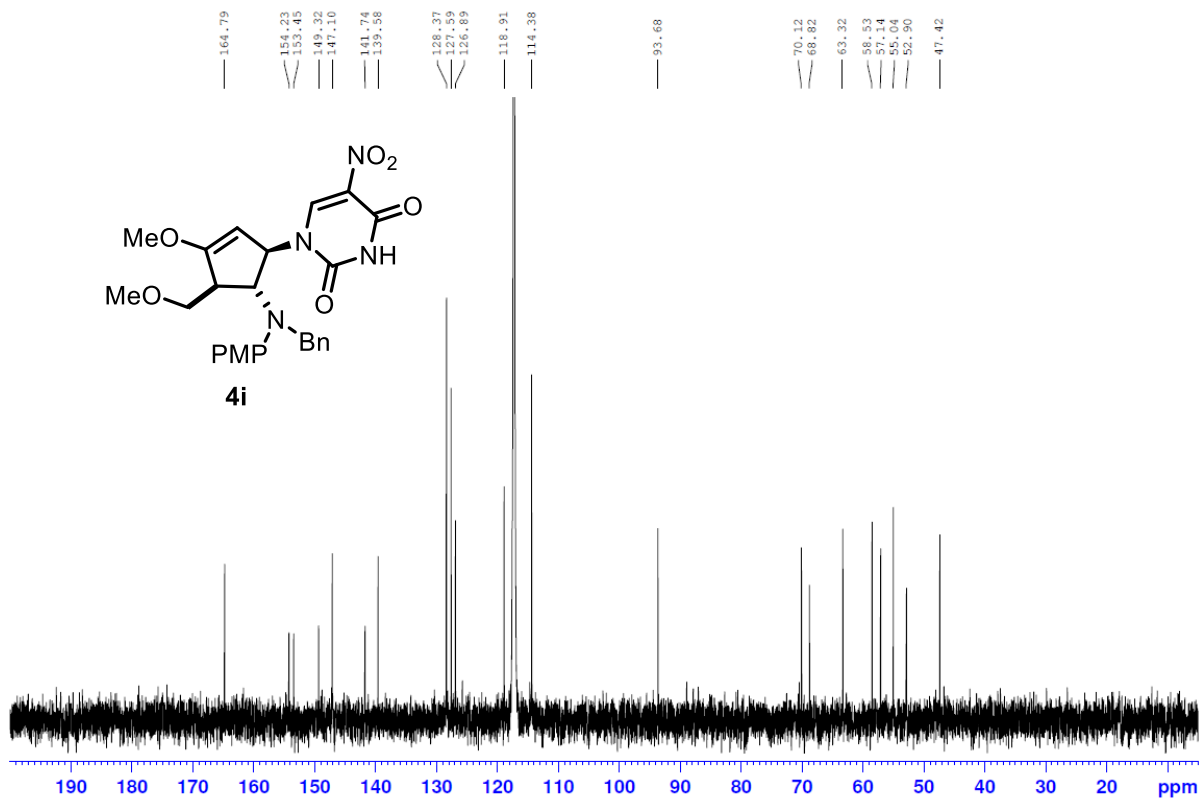

R6-084-p, 1H, BBFO2 400, CD3CN, Apr-14

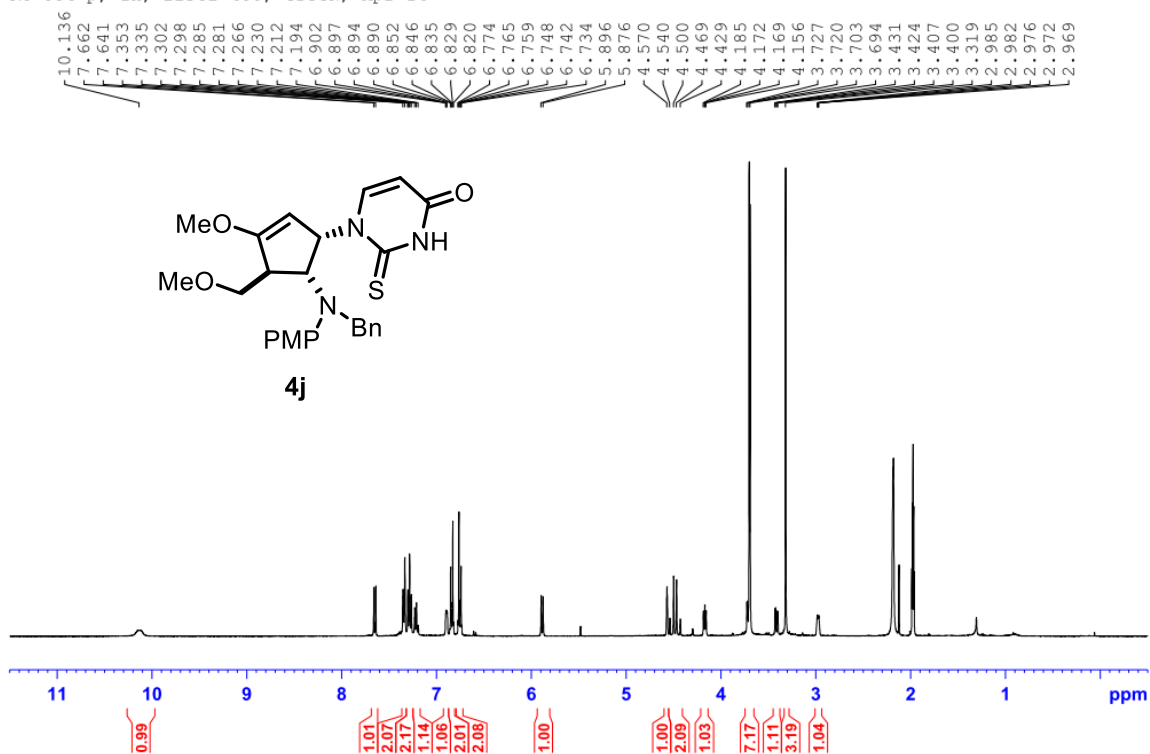

R6-084-p, 13C, BBFO2 400, CD3CN, Apr-14

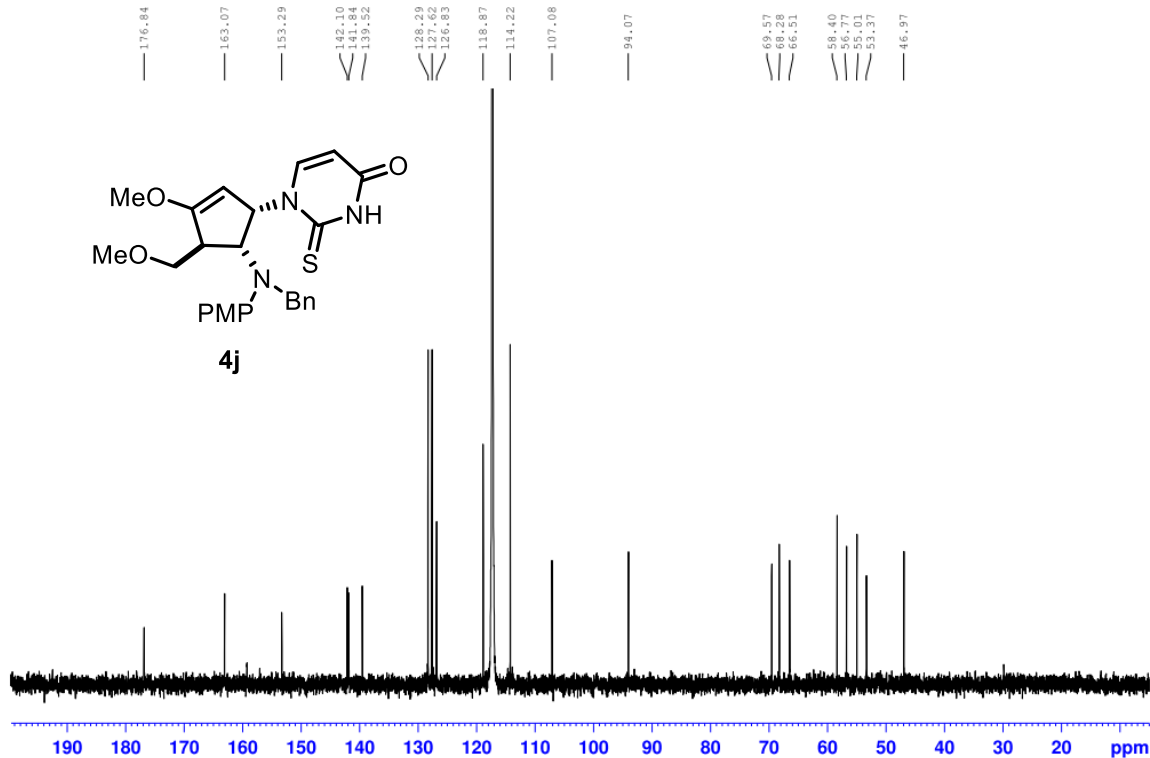

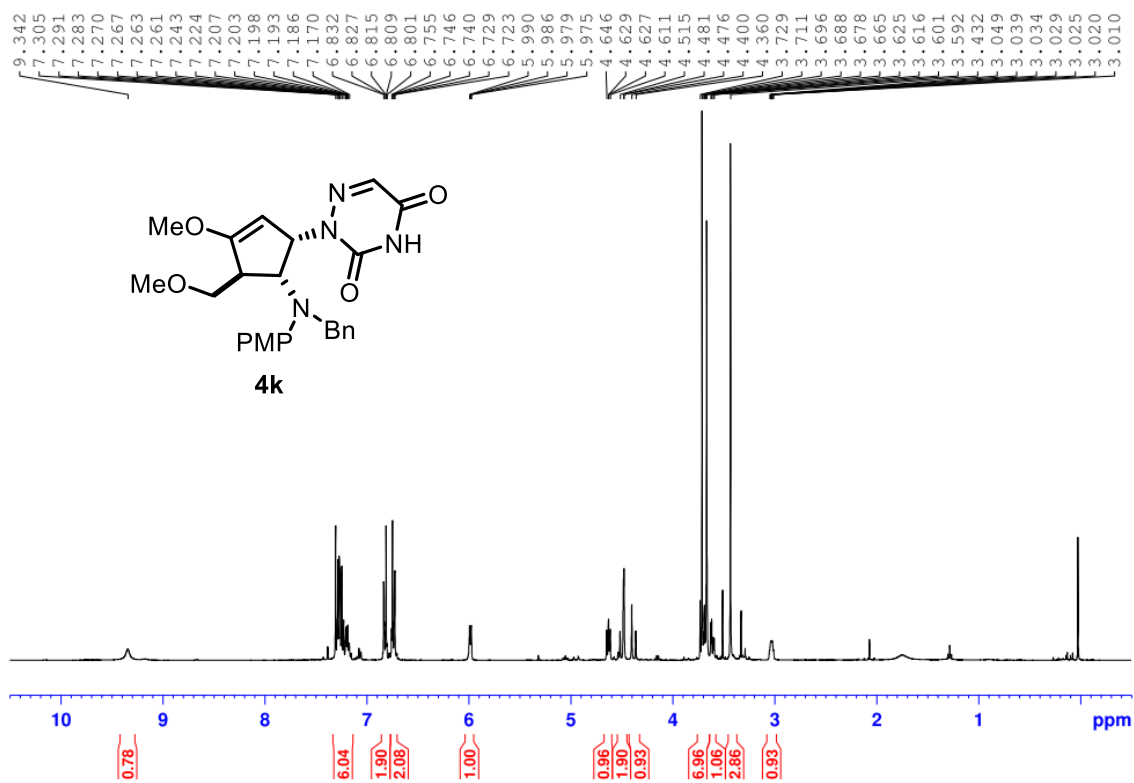

R6-140-3, 13C, BBFO1400, CDC13, Jun-14

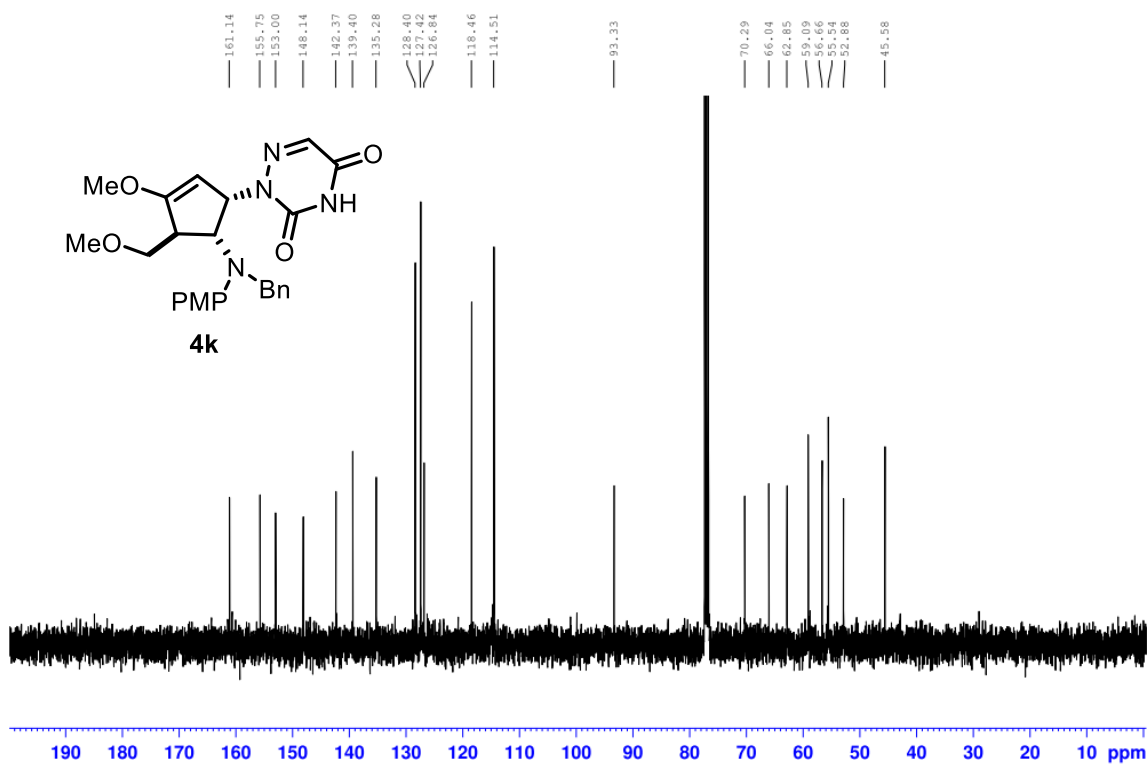

R6-125-p, 1H, BBFO2 400, CD3CN, Jun-14

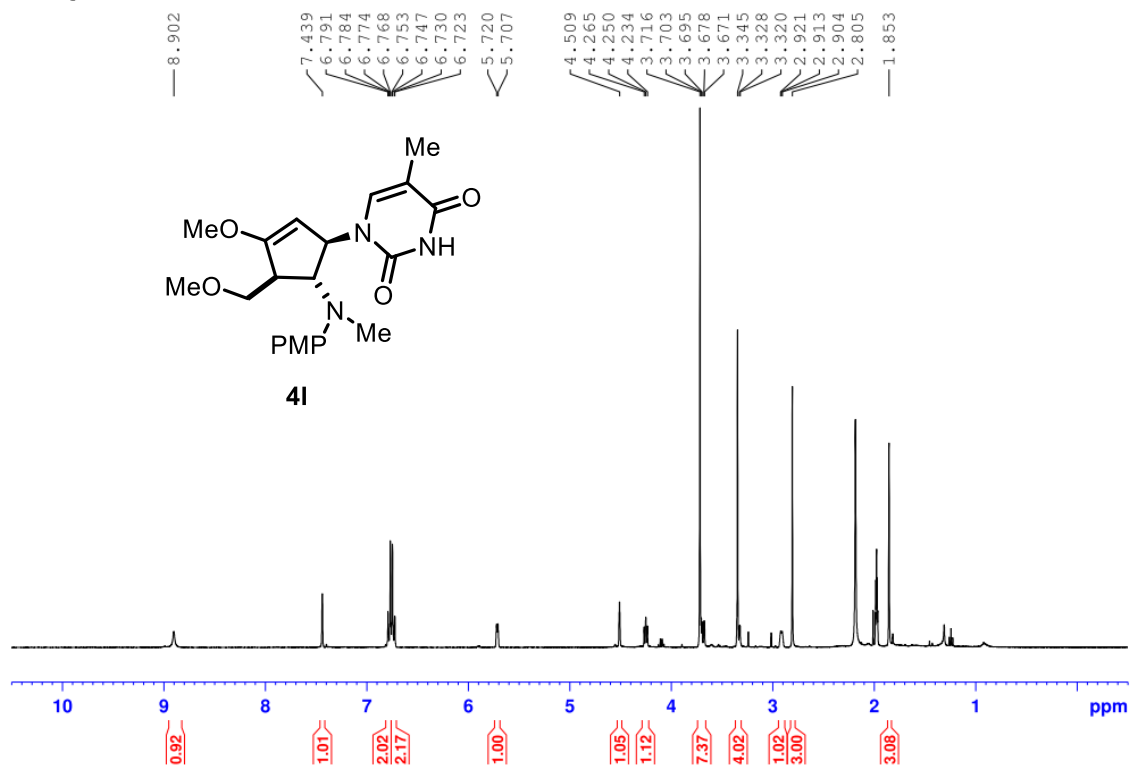

R6-125-p, 13C, BBFO2 400, CD3CN, Jun-14

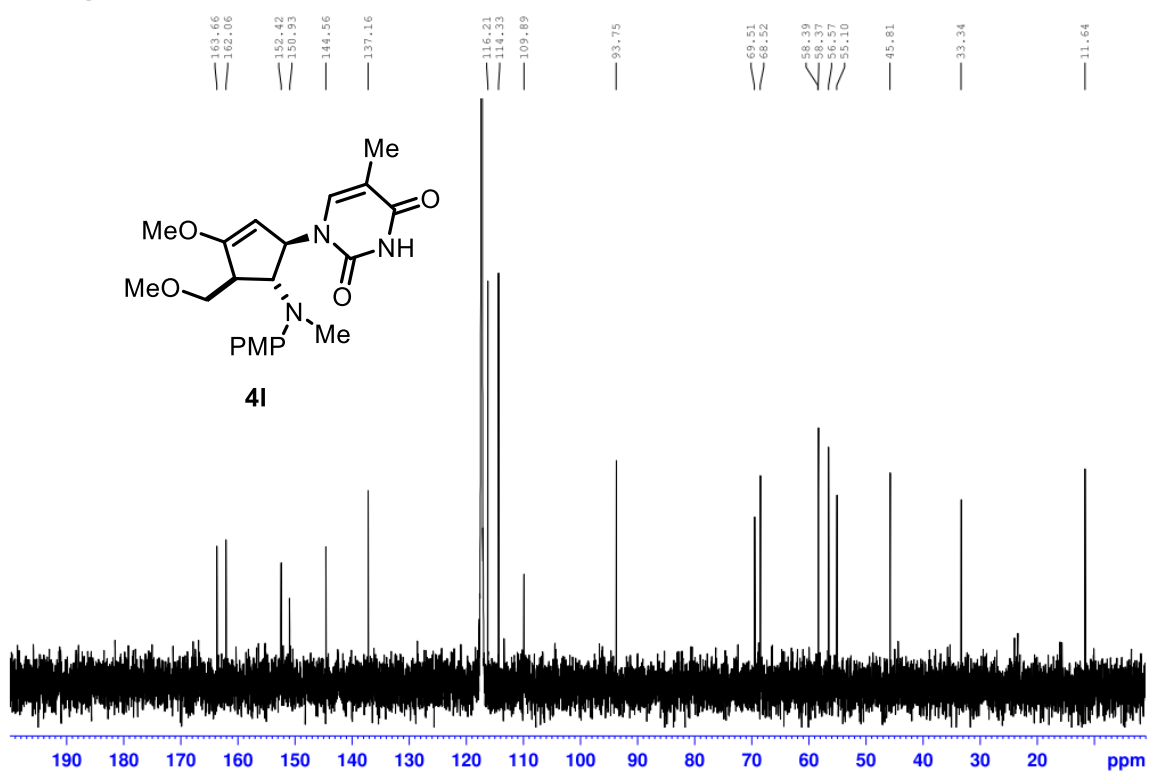

R6-106-p, 1H, BBFO2 400, CD3CN, May-14

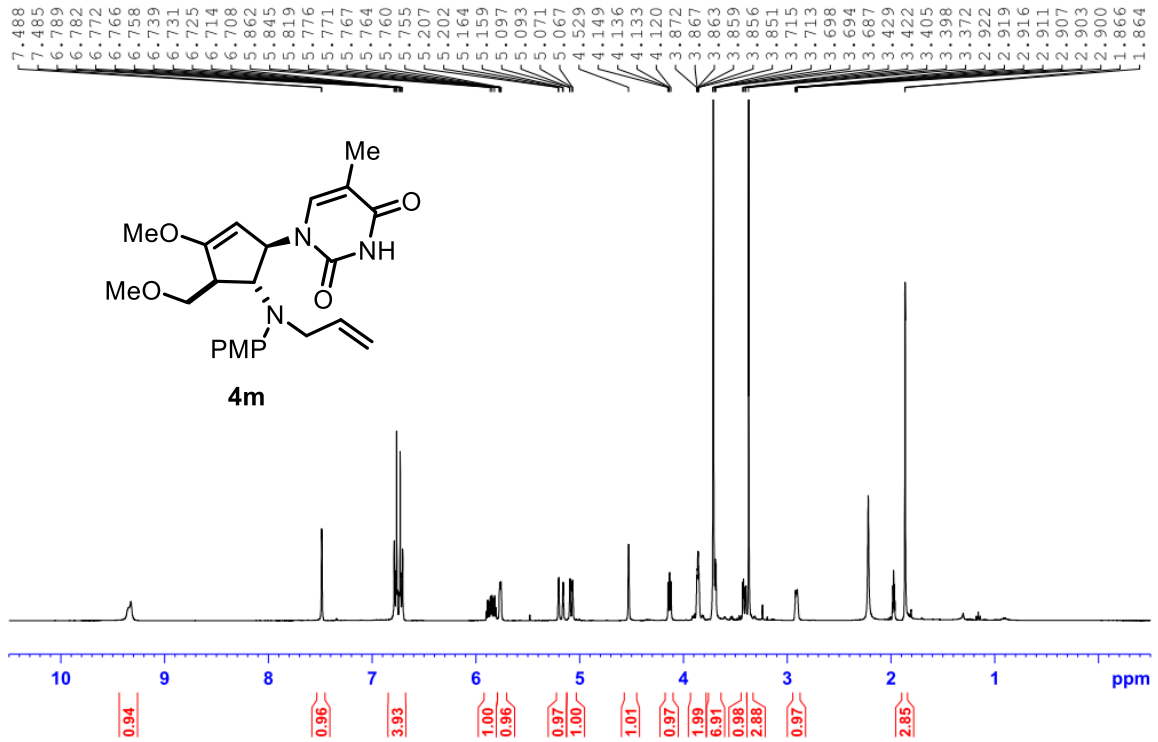

R6-106-p, 13C, BBFO2 400, CD3CN, May-14

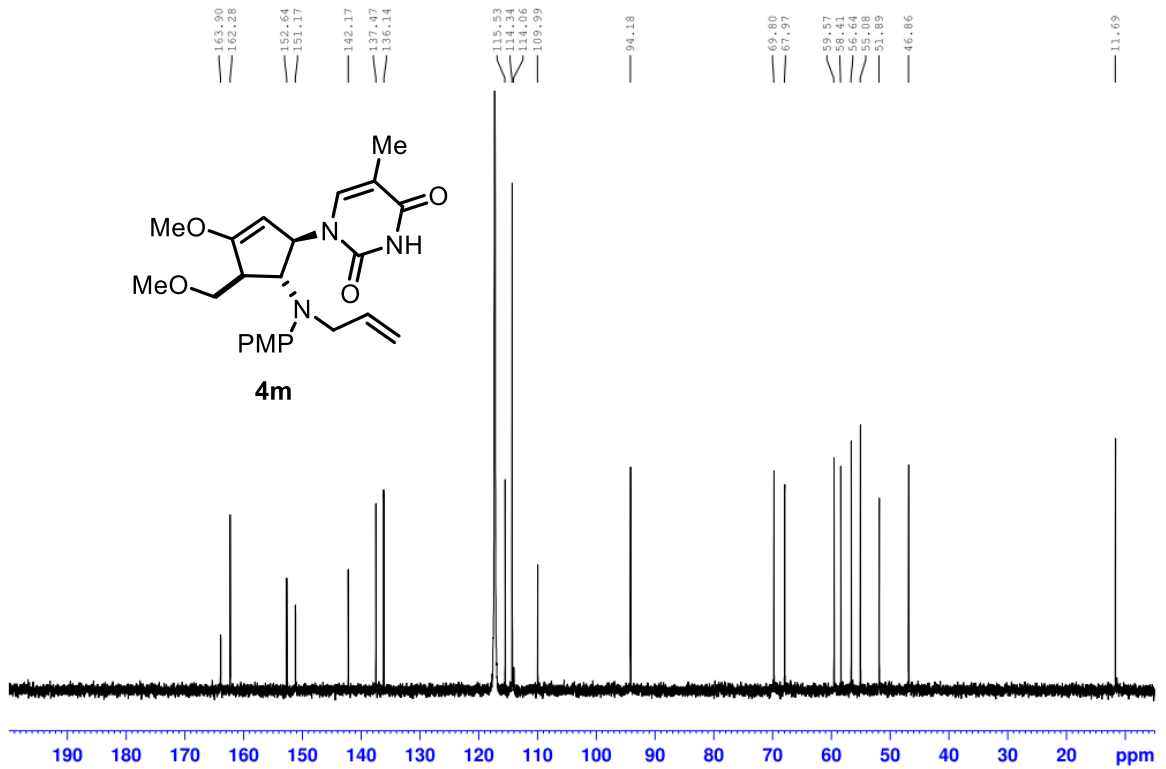



R6-124-p, 1H, BBFO2 400, CD3CN, Jun-14

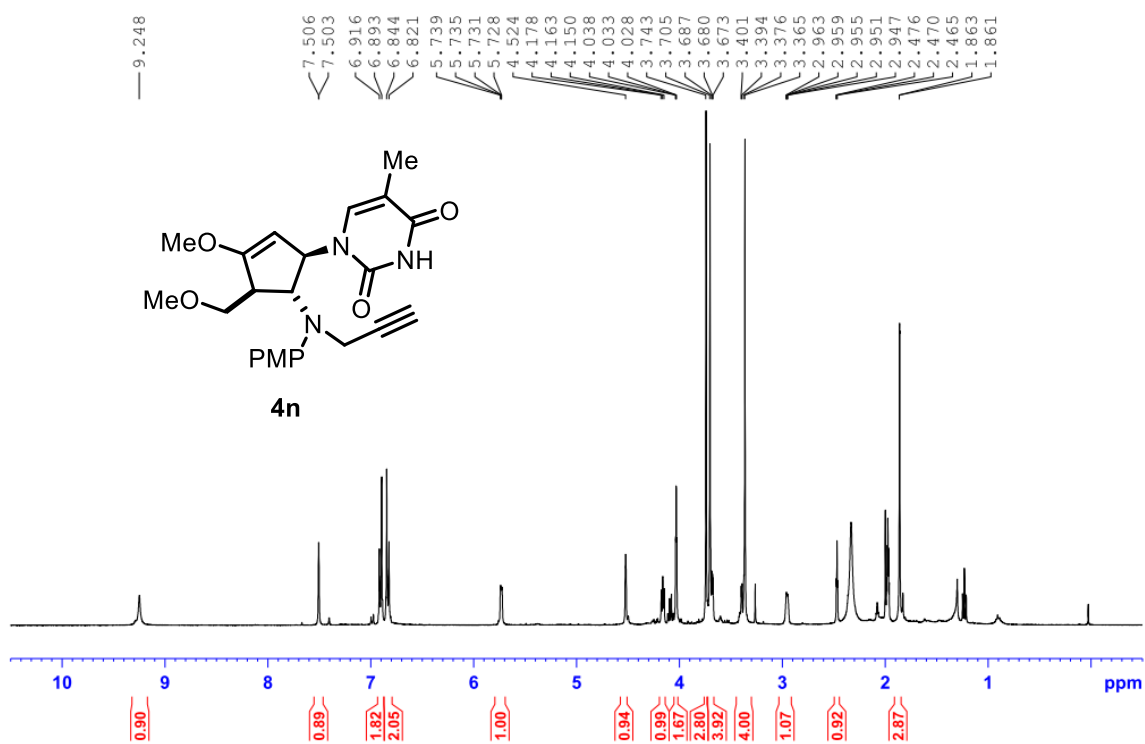

R6-124-p, 13C, BBFO2 400, CD3CN, Jun-14

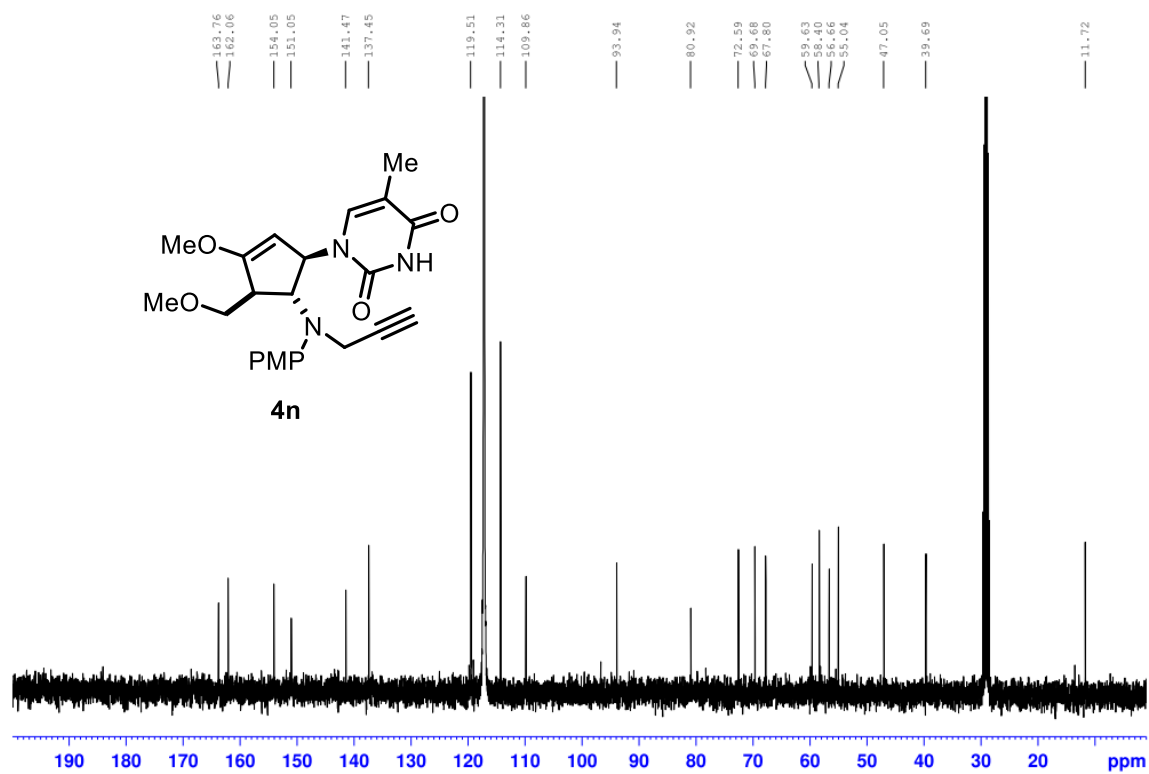

R6-108-p, <sup>1</sup>H, BBFO2 400, CD3CN, May-14

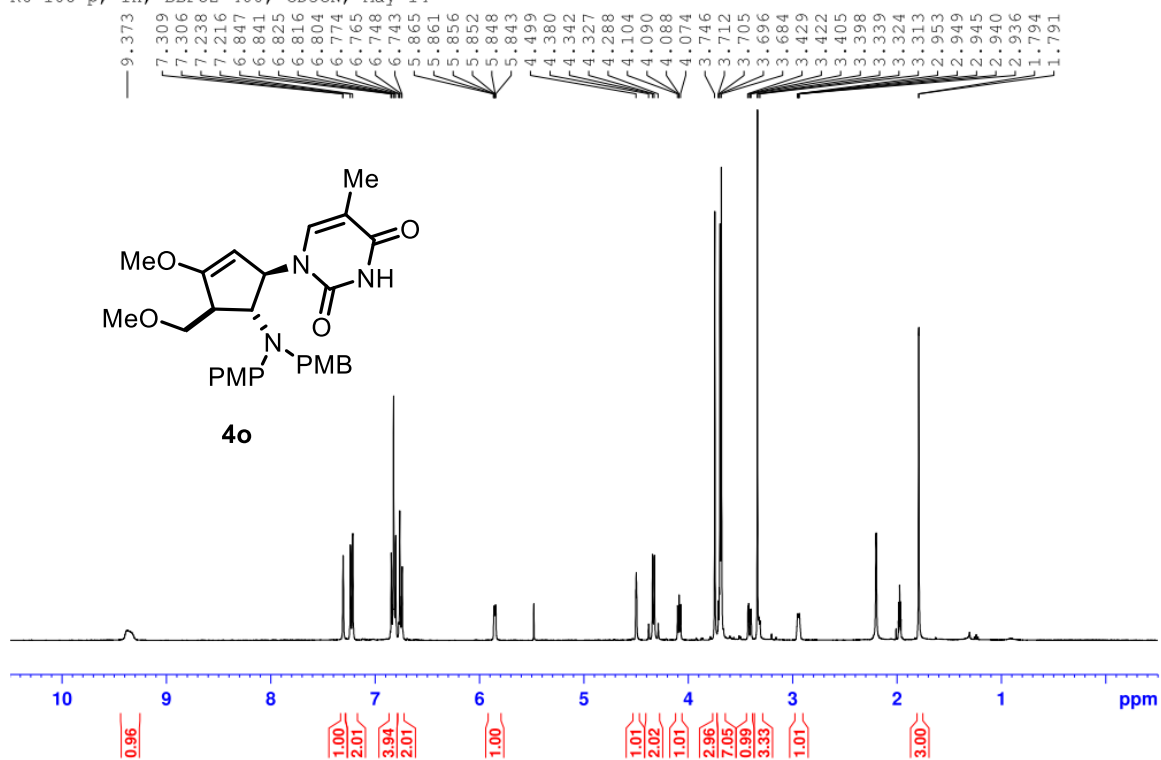

R6-108-p, <sup>13</sup>C, BBFO2 400, CD3CN, May-14

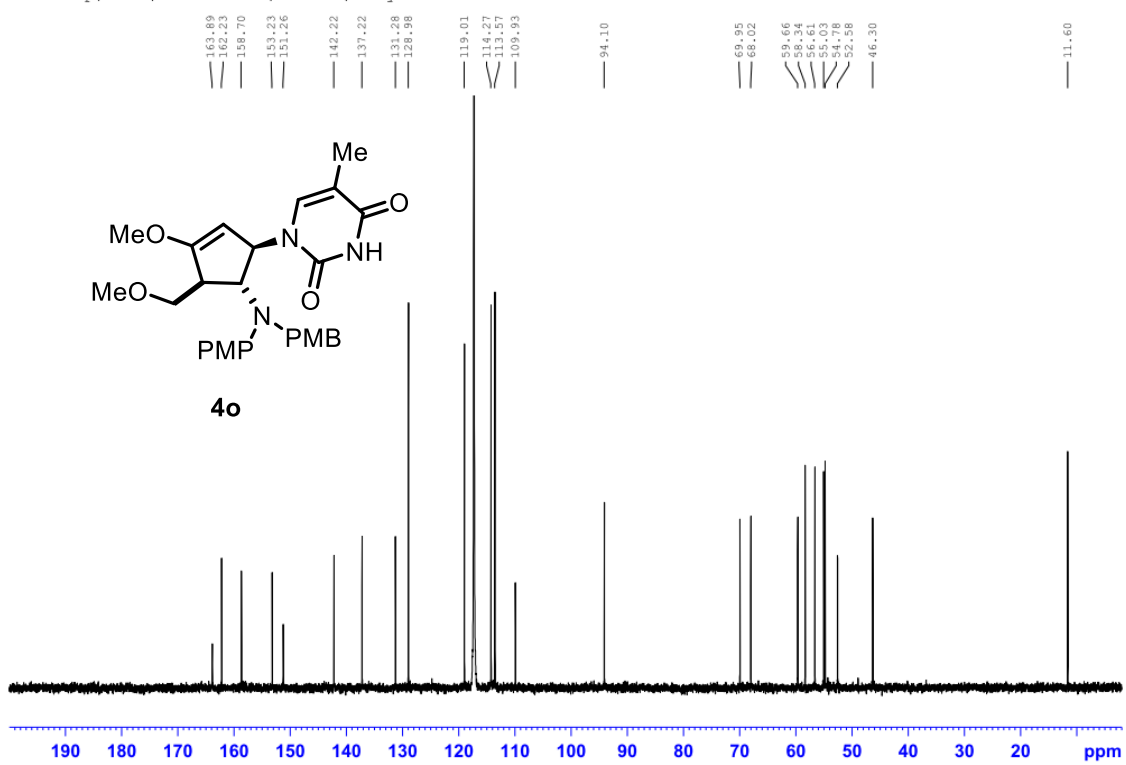

R6-109-p, 1H, BBFO2 400, CD3CN, May-14

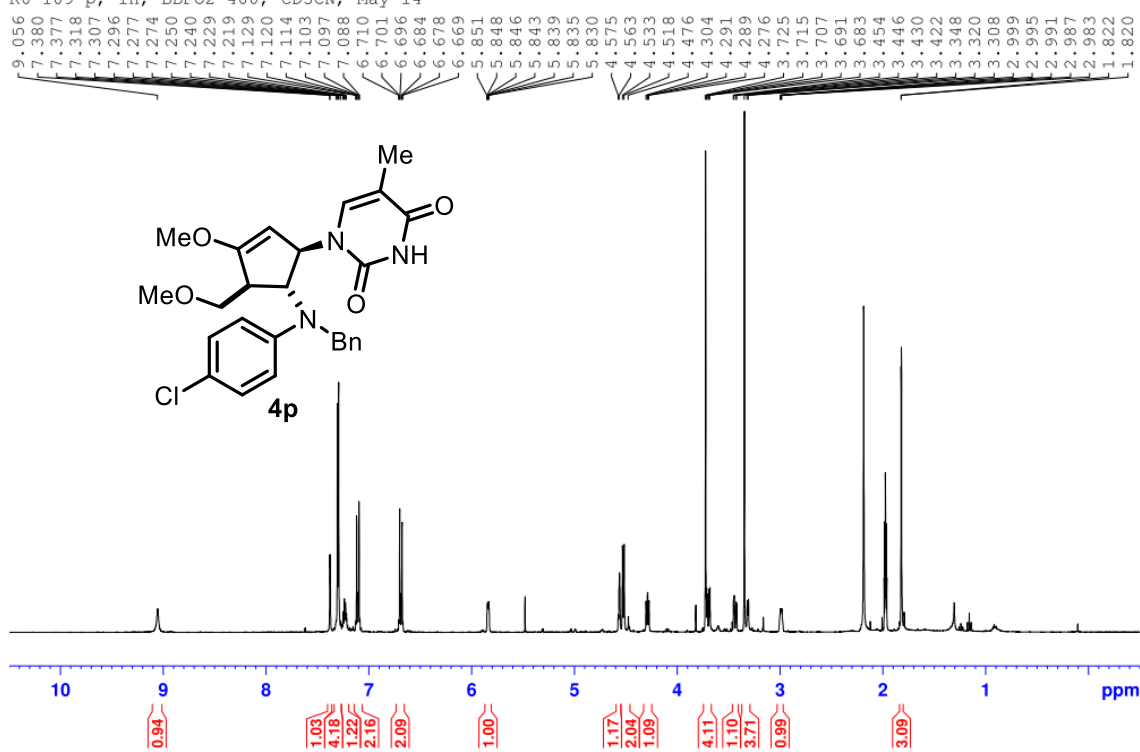

R6-109-p, 13C, BBFO2 400, CD3CN, May-14

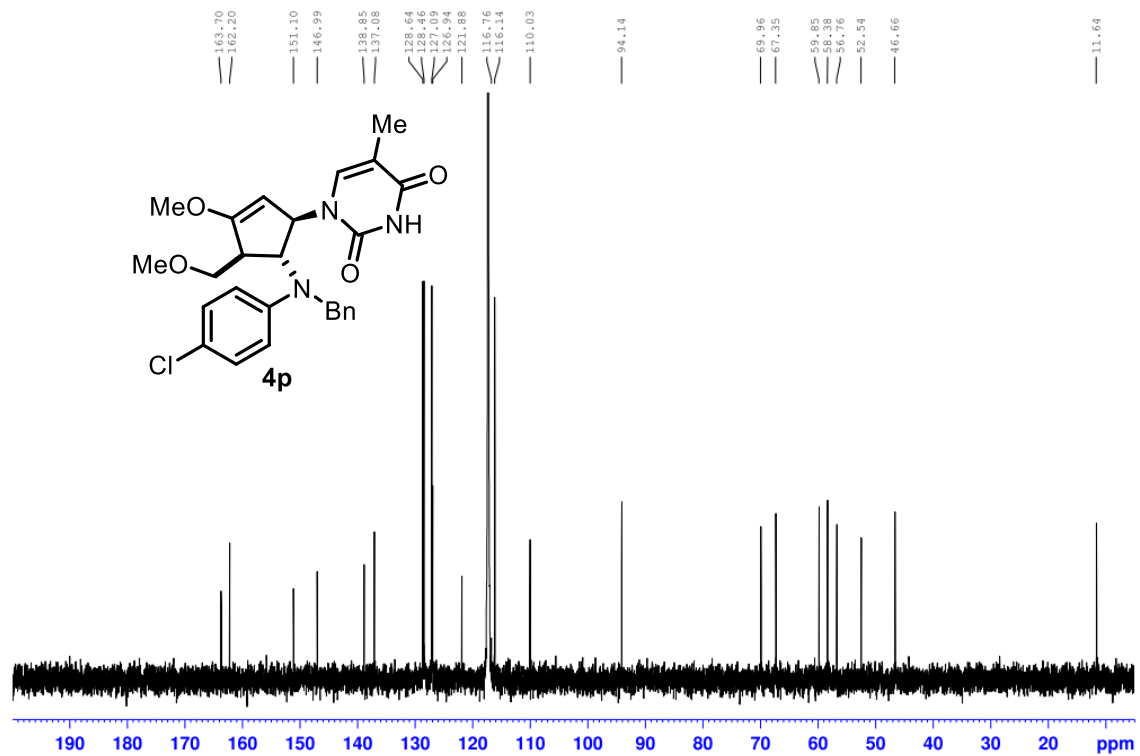



R6-141-1p, 1H, BBF01400, CDC13, Jun-14

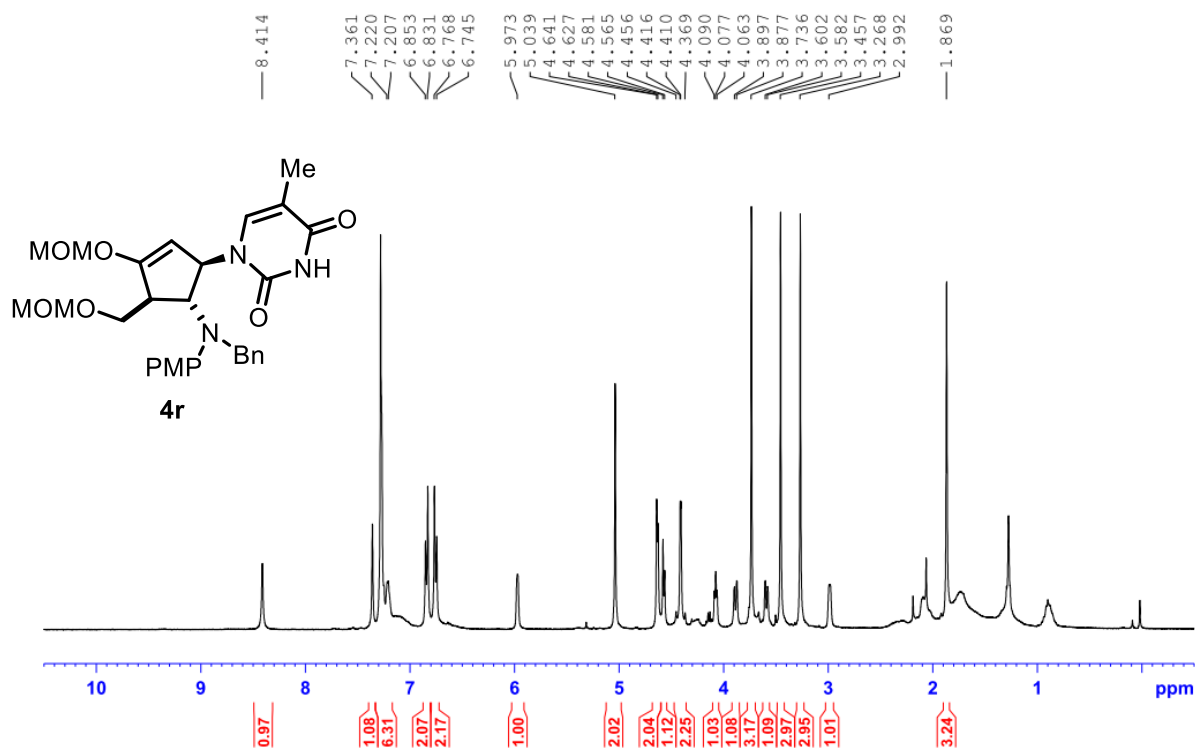

R6-141-2p, 1H, BBF01400, CDC13, Jun-14

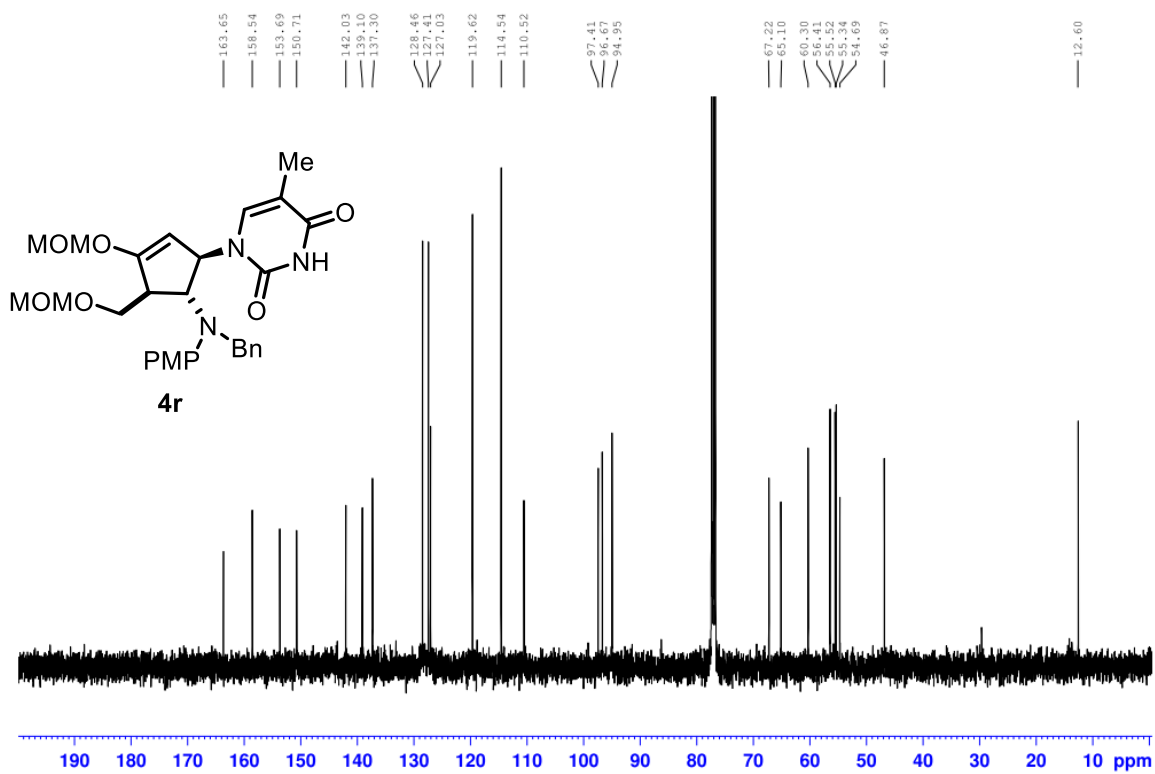

R6-126-p, <sup>1</sup>H, BBFO2 400, CD<sub>3</sub>CN, Jun-14

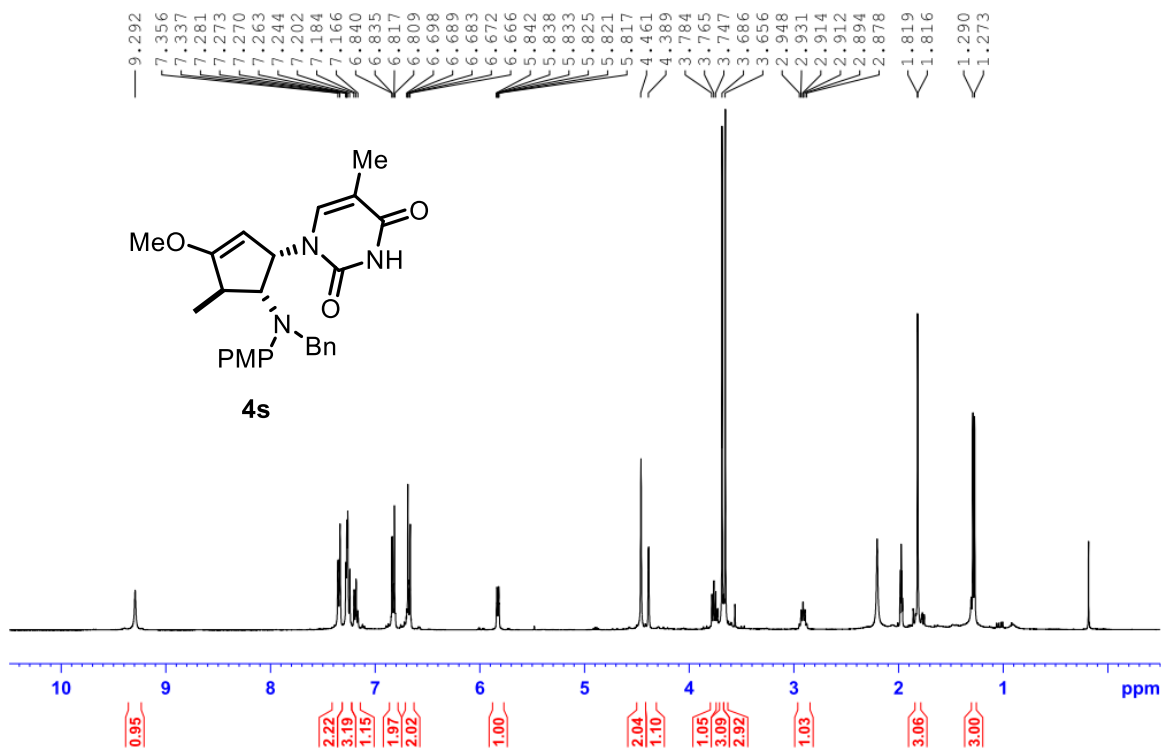

R6-126-p, <sup>13</sup>C, BBFO2 400, CD<sub>3</sub>CN, Jun-14

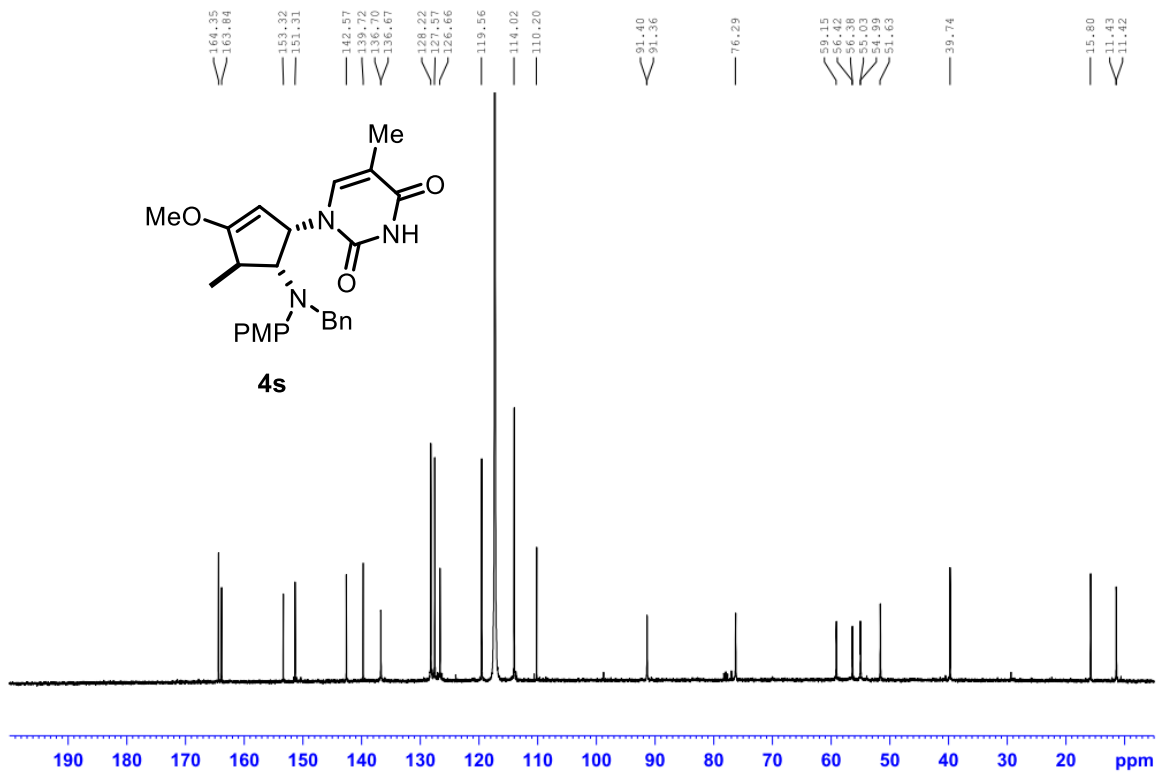

R6-052-2, 1H, BBF01400, MeOD, Nov-2013

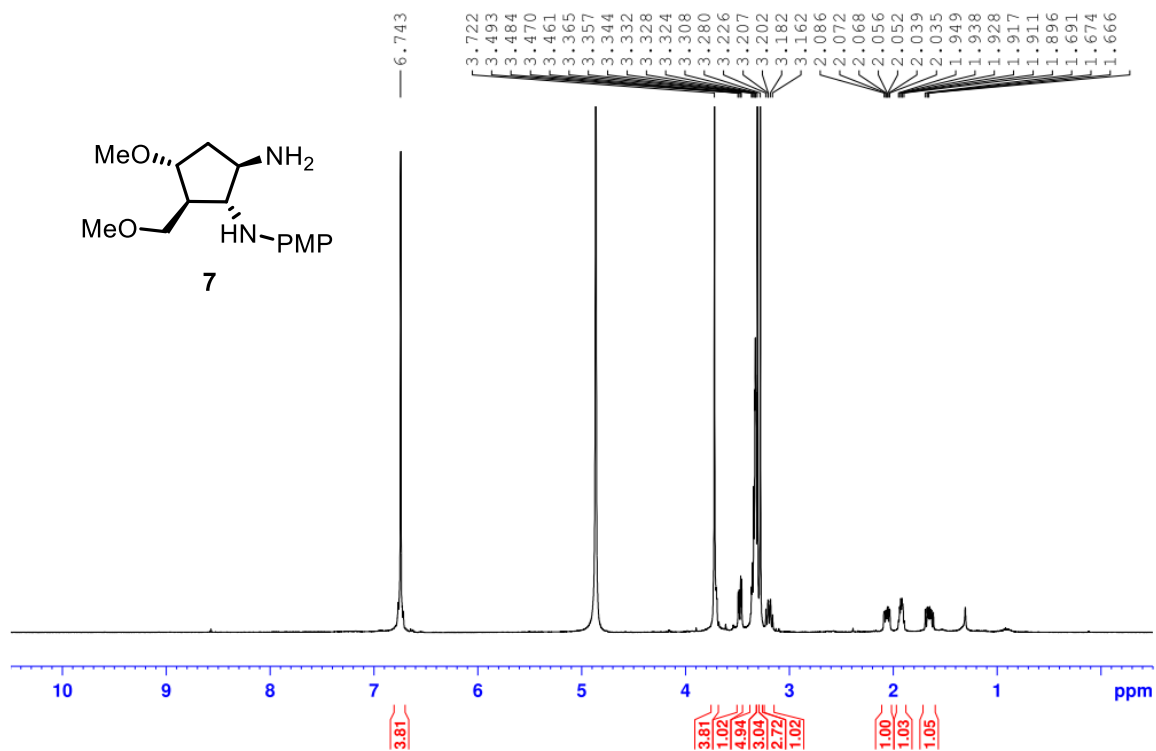

R6-052-2, 13C, BBF01400, MeOD, Nov-2013

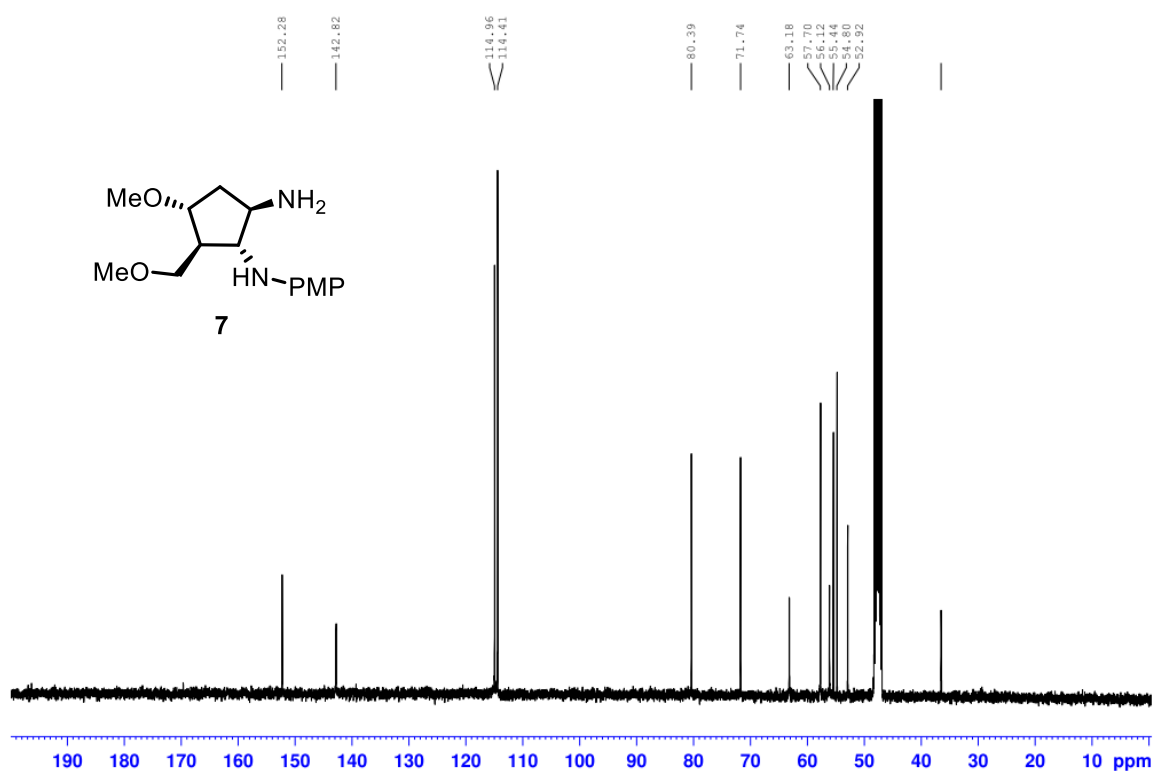

COSY of 7

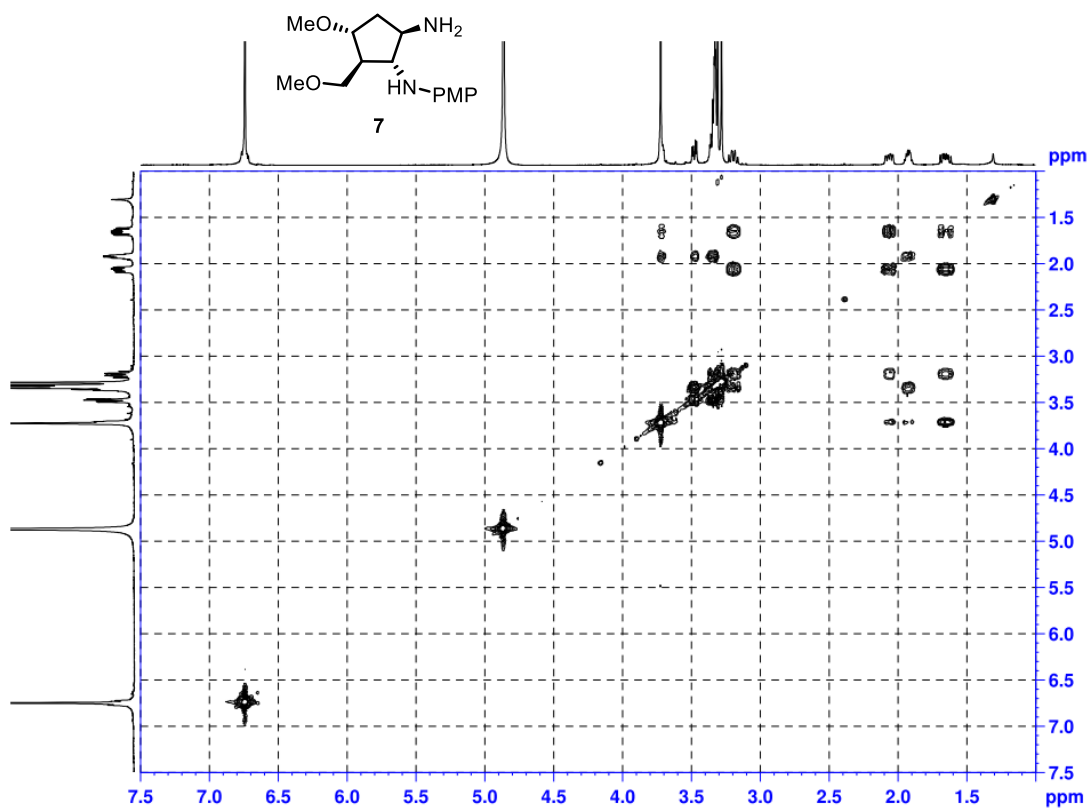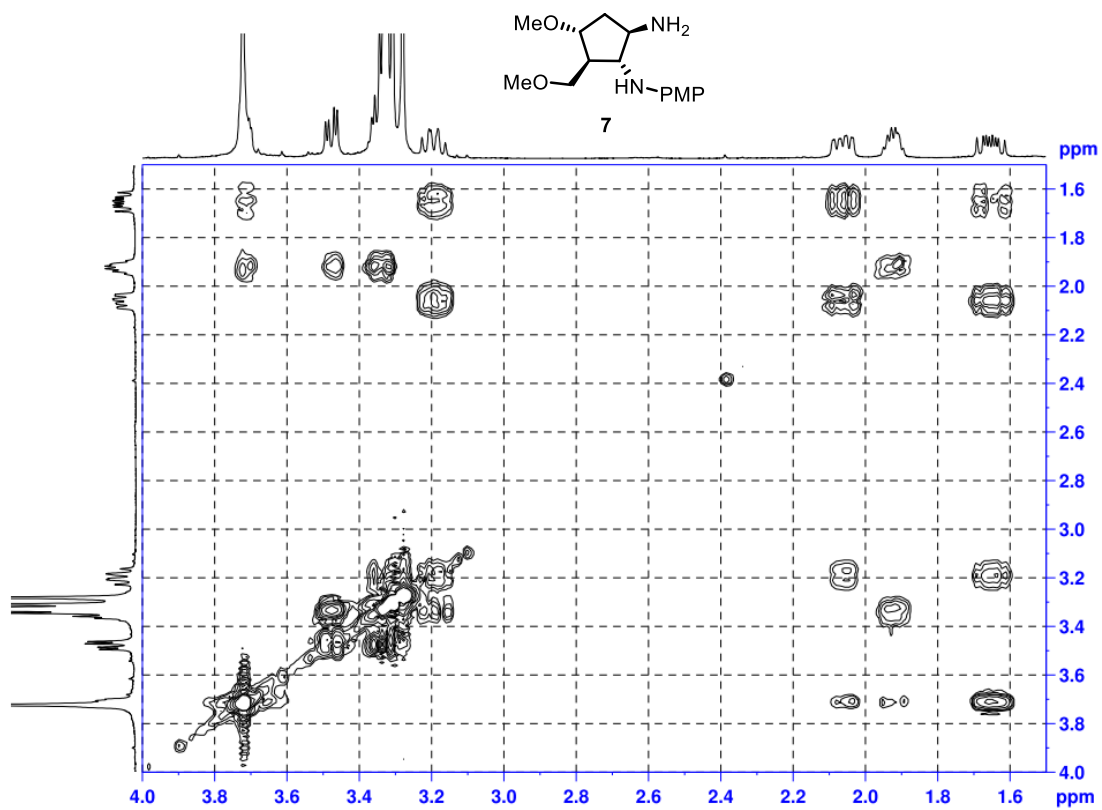



NOESY of 7

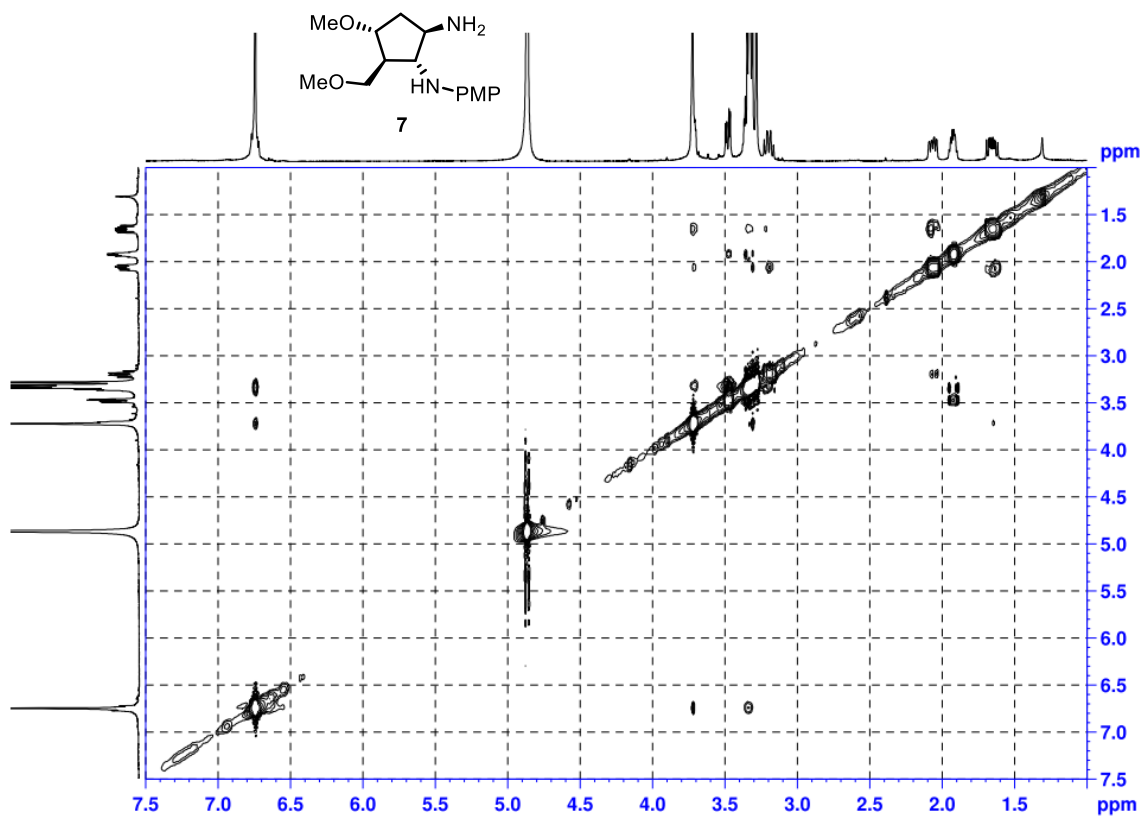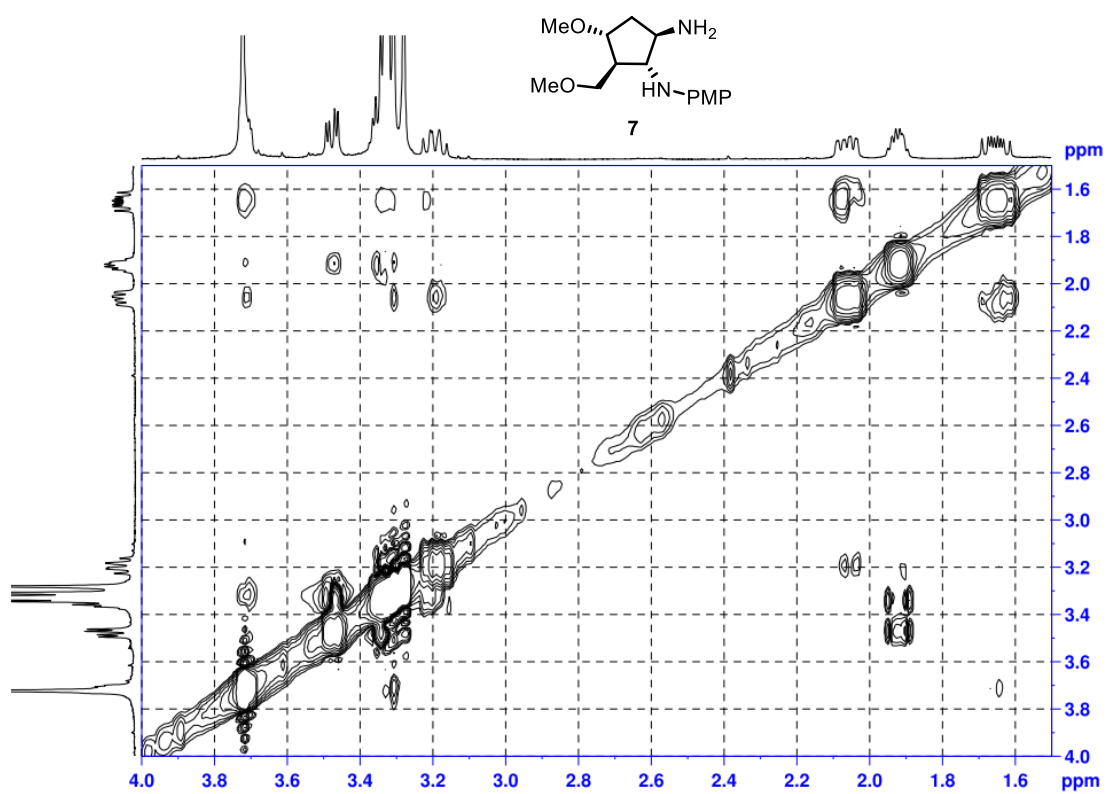

## Computational Section

All DFT calculations were performed with the Gaussian09 program package.<sup>1</sup> Geometry optimizations were done by employing density functional theory B3LYP with 6-311G(d+p) basis set. Frequency analysis was done at the same level of theory to verify that the optimized structures are real minima or saddle point on the potential energy surface, and to get the thermodynamic corrections. Intrinsic reaction coordinate (IRC) calculations were used to confirm that the transition states found connected and related to reactants and products. On the optimized structures, single point energy calculations were performed using 6-311G(d+p). Solvation effects were computed by the polarizable continuum model (PCM) in Gaussian 09. Acetonitrile was used as the solvent to model the reaction medium. Single point energies in solution including all computed corrections were appended with the correction to Gibbs free energy from 6-311G(d+p) frequencies computed for 1 mol/L solution at 298.15 K. to describe reaction energetics, as reflected by the relative Gibbs free energy in Figure S1.

### Free energy profile for addition of silylated pyrimidine to oxyallyl cation

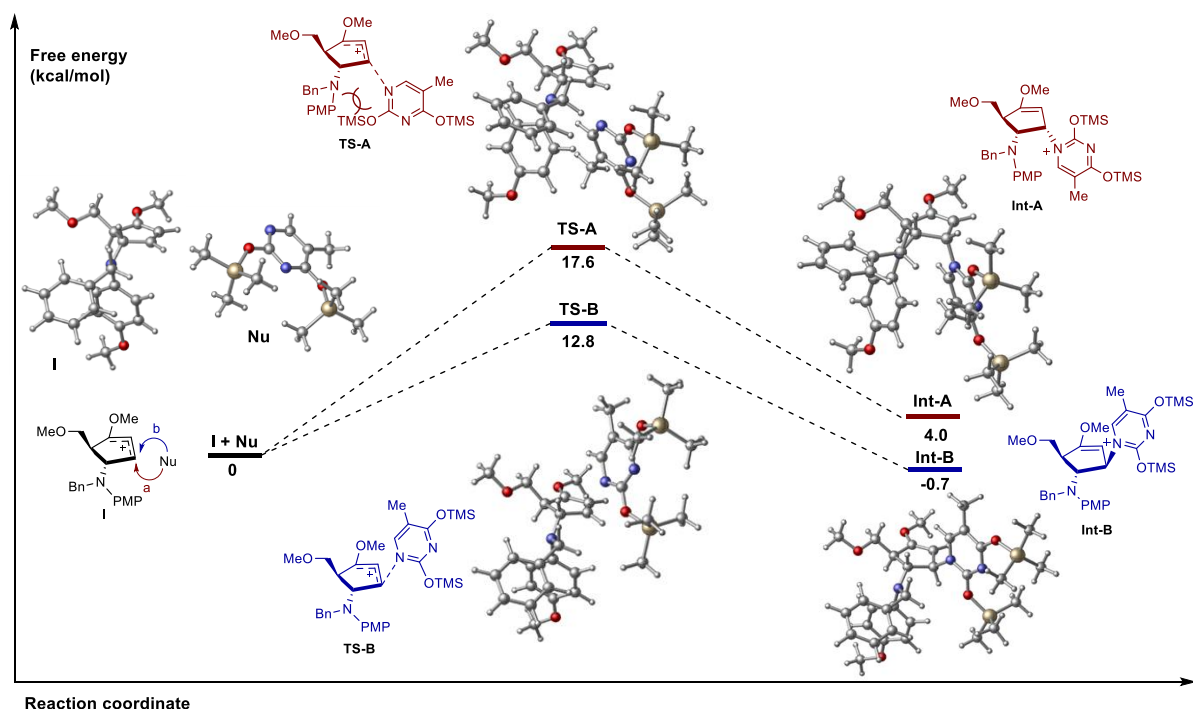

**Figure S1.** Free energy profile for addition of silylated pyrimidine to oxyallyl cation. Energies are calculated at the B3LYP/6-311G(d,p) level of theory with acetonitrile as solvent. Nu= silylated pyrimidine.

Silylated pyrimidine could in principle approach the oxyallyl cation at C-3 from the top or bottom face. To gain more insight into this intriguing preference for formation of the observed diastereomer, a simple theoretical DFT calculation was conducted, the result of which is summarized in the energy diagram depicted in Figure S1. Attack from the bottom face (path a) would lead to pathway with higher activation energy barrier via **TS-A** and result in less energetically favourable **Int-A**, presumably due to steric reason. In stark contrast, alternative pathway in which incoming nucleophile approaches from top face (path b) proceeds through lower energy **TS-B** ( $\Delta\Delta G^\ddagger = 4.8$  kcal/mol) and renders more stable **Int-B**.

### Relevant optimized structures in Figure S1

#### Oxyallyl cation

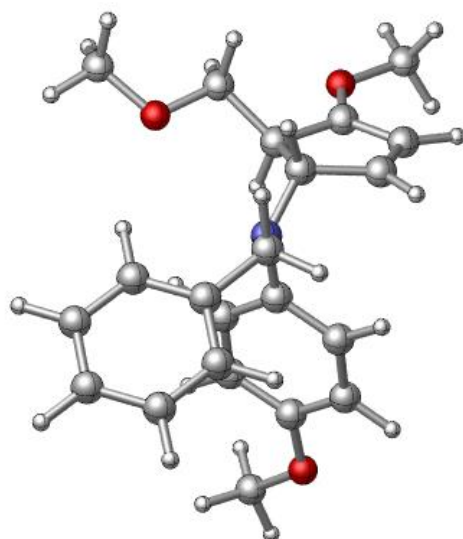

| Center Number | Atomic Number | Forces (Hartrees/Bohr) |              |              |
|---------------|---------------|------------------------|--------------|--------------|
|               |               | X                      | Y            | Z            |
| 1             | 6             | -0.000009831           | -0.000006170 | -0.000001538 |
| 2             | 6             | 0.000011593            | 0.000021835  | -0.000010901 |
| 3             | 1             | 0.000002852            | 0.000006081  | 0.000004071  |
| 4             | 1             | -0.000000572           | -0.000005112 | 0.000001524  |
| 5             | 6             | -0.000005572           | 0.000020422  | 0.000001114  |
| 6             | 1             | -0.000007684           | 0.000000381  | -0.000003285 |
| 7             | 6             | 0.000009935            | -0.000009087 | 0.000000802  |
| 8             | 8             | -0.000013668           | 0.000001387  | 0.000001910  |
| 9             | 6             | 0.000005025            | 0.000010806  | -0.000004179 |

|    |   |              |              |              |
|----|---|--------------|--------------|--------------|
| 10 | 1 | -0.000007218 | 0.000006588  | 0.000004926  |
| 11 | 1 | -0.000003286 | 0.000007098  | 0.000006150  |
| 12 | 1 | -0.000004864 | 0.000004820  | 0.000001899  |
| 13 | 7 | 0.000001515  | -0.000013086 | 0.000013248  |
| 14 | 6 | -0.000006225 | -0.000002509 | -0.000011889 |
| 15 | 1 | 0.000005379  | -0.000002185 | 0.000000548  |
| 16 | 1 | 0.000000441  | 0.000002155  | -0.000002908 |
| 17 | 6 | -0.000005764 | -0.000000909 | -0.000005559 |
| 18 | 6 | -0.000002131 | -0.000004535 | -0.000003000 |
| 19 | 6 | 0.000000017  | -0.000000195 | 0.000002976  |
| 20 | 6 | 0.000001489  | 0.000002860  | -0.000002661 |
| 21 | 1 | -0.000001322 | 0.000003209  | -0.000003200 |
| 22 | 6 | 0.000000404  | -0.000000932 | -0.000001367 |
| 23 | 1 | 0.000000344  | -0.000002001 | 0.000000211  |
| 24 | 6 | -0.000004712 | 0.000004924  | -0.000005668 |
| 25 | 1 | -0.000002782 | 0.000003629  | -0.000005233 |
| 26 | 1 | -0.000002917 | -0.000000132 | 0.000000344  |
| 27 | 6 | -0.000000273 | 0.000002164  | -0.000002640 |
| 28 | 6 | 0.000007024  | -0.000005777 | -0.000003623 |
| 29 | 6 | 0.000002823  | -0.000006527 | 0.000000487  |
| 30 | 6 | 0.000003971  | -0.000010188 | 0.000001109  |
| 31 | 1 | 0.000002473  | -0.000003146 | 0.000000182  |
| 32 | 6 | 0.000005464  | -0.000006151 | -0.000008501 |
| 33 | 1 | 0.000001332  | -0.000003485 | -0.000005884 |
| 34 | 6 | 0.000001909  | -0.000001880 | -0.000000886 |
| 35 | 1 | 0.000004406  | -0.000005509 | 0.000000008  |
| 36 | 1 | 0.000004438  | -0.000004715 | -0.000005668 |
| 37 | 1 | 0.000005118  | -0.000006204 | -0.000002473 |
| 38 | 8 | -0.000001075 | -0.000000224 | 0.000006715  |
| 39 | 6 | -0.000001616 | 0.000007696  | -0.000002549 |
| 40 | 1 | -0.000001685 | 0.000003832  | -0.000001614 |
| 41 | 1 | -0.000000819 | 0.000000773  | 0.000001110  |
| 42 | 1 | -0.000001895 | 0.000003053  | 0.000002499  |
| 43 | 6 | 0.000001082  | -0.000000185 | 0.000002021  |
| 44 | 1 | -0.000000193 | 0.000000556  | 0.000003492  |
| 45 | 1 | -0.000000192 | 0.000003006  | 0.000004787  |
| 46 | 8 | 0.000001492  | -0.000002437 | 0.000008705  |
| 47 | 6 | 0.000000096  | -0.000003224 | 0.000004952  |
| 48 | 1 | 0.000001935  | -0.000001656 | 0.000006430  |
| 49 | 1 | 0.000002225  | -0.000002740 | 0.000006196  |
| 50 | 1 | 0.000002210  | -0.000002696 | 0.000005764  |
| 51 | 6 | -0.000001644 | -0.000006377 | 0.000001460  |
| 52 | 1 | 0.000000945  | 0.000002699  | -0.000000412 |

---

## Silylated Pyrimidine

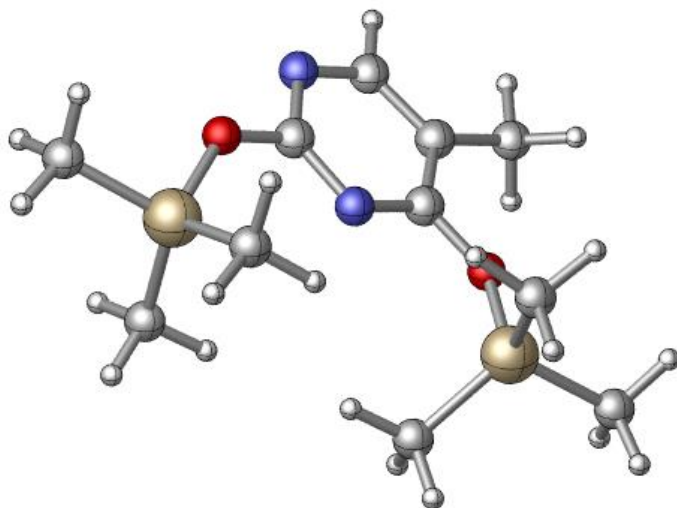

| Center Number | Atomic Number | Atomic Type | Coordinates (Angstroms) |           |           |
|---------------|---------------|-------------|-------------------------|-----------|-----------|
|               |               |             | X                       | Y         | Z         |
| 1             | 6             | 0           | -1.732469               | -0.683540 | -3.088004 |
| 2             | 6             | 0           | -1.756431               | -1.586909 | -4.131948 |
| 3             | 1             | 0           | -2.476143               | 0.106962  | -3.033721 |
| 4             | 7             | 0           | -0.827685               | -0.710942 | -2.098595 |
| 5             | 6             | 0           | 0.094055                | -1.668467 | -2.162291 |
| 6             | 7             | 0           | 0.190807                | -2.591738 | -3.124420 |
| 7             | 6             | 0           | -0.723544               | -2.552534 | -4.095196 |
| 8             | 8             | 0           | -0.680315               | -3.445510 | -5.078113 |
| 9             | 14            | 0           | 0.521708                | -4.580987 | -5.578102 |
| 10            | 6             | 0           | 0.778632                | -5.884269 | -4.259827 |
| 11            | 1             | 0           | 1.252281                | -5.472979 | -3.367645 |
| 12            | 1             | 0           | -0.173083               | -6.337348 | -3.968285 |
| 13            | 1             | 0           | 1.421146                | -6.679091 | -4.652110 |
| 14            | 6             | 0           | 2.084412                | -3.636776 | -5.996146 |
| 15            | 1             | 0           | 2.861885                | -4.330585 | -6.330599 |
| 16            | 1             | 0           | 1.901486                | -2.922594 | -6.803880 |
| 17            | 1             | 0           | 2.468508                | -3.088062 | -5.134025 |
| 18            | 6             | 0           | -0.264799               | -5.319902 | -7.106648 |
| 19            | 1             | 0           | -1.204972               | -5.822360 | -6.863054 |
| 20            | 1             | 0           | -0.471360               | -4.551227 | -7.856174 |
| 21            | 1             | 0           | 0.403858                | -6.059542 | -7.557440 |
| 22            | 8             | 0           | 0.982806                | -1.668078 | -1.165541 |
| 23            | 14            | 0           | 2.164642                | -2.830750 | -0.686235 |
| 24            | 6             | 0           | 3.479805                | -3.005873 | -2.006505 |
| 25            | 1             | 0           | 3.906303                | -2.032222 | -2.264243 |
| 26            | 1             | 0           | 4.291790                | -3.638505 | -1.634002 |
| 27            | 1             | 0           | 3.083545                | -3.460033 | -2.915271 |
| 28            | 6             | 0           | 2.875407                | -2.045397 | 0.857065  |
| 29            | 1             | 0           | 3.320012                | -1.071223 | 0.635218  |
| 30            | 1             | 0           | 2.108145                | -1.905443 | 1.623076  |
| 31            | 1             | 0           | 3.658878                | -2.682778 | 1.278296  |
| 32            | 6             | 0           | 1.288690                | -4.439741 | -0.295841 |

|    |   |   |           |           |           |
|----|---|---|-----------|-----------|-----------|
| 33 | 1 | 0 | 0.767934  | -4.839614 | -1.167967 |
| 34 | 1 | 0 | 2.011790  | -5.188797 | 0.041219  |
| 35 | 1 | 0 | 0.556949  | -4.296244 | 0.504160  |
| 36 | 6 | 0 | -2.779502 | -1.555557 | -5.229960 |
| 37 | 1 | 0 | -3.358100 | -2.483083 | -5.258263 |
| 38 | 1 | 0 | -3.472231 | -0.724475 | -5.086393 |
| 39 | 1 | 0 | -2.305899 | -1.443873 | -6.209136 |

TS-A

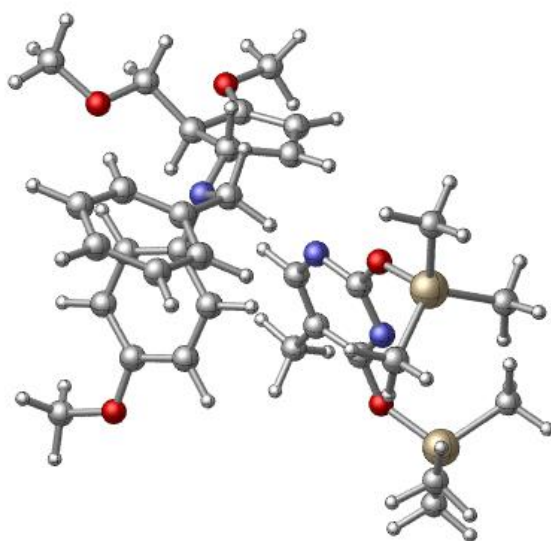

| Center Number | Atomic Number | Atomic Type | Coordinates (Angstroms) |           |           |
|---------------|---------------|-------------|-------------------------|-----------|-----------|
|               |               |             | X                       | Y         | Z         |
| 1             | 6             | 0           | -2.420938               | 2.561217  | -0.225930 |
| 2             | 6             | 0           | -1.438386               | 1.549099  | 0.423223  |
| 3             | 1             | 0           | -3.263979               | 2.028241  | -0.674859 |
| 4             | 1             | 0           | -0.905955               | 2.114379  | 1.203720  |
| 5             | 6             | 0           | -0.416333               | 2.415662  | -1.561829 |
| 6             | 1             | 0           | 0.316208                | 2.620536  | -2.327454 |
| 7             | 6             | 0           | -1.597979               | 3.121868  | -1.350529 |
| 8             | 8             | 0           | -2.036951               | 4.174964  | -1.966666 |
| 9             | 6             | 0           | -1.257410               | 4.750264  | -3.054732 |
| 10            | 1             | 0           | -1.152530               | 4.017129  | -3.853583 |
| 11            | 1             | 0           | -1.833317               | 5.605367  | -3.392799 |
| 12            | 1             | 0           | -0.285158               | 5.065553  | -2.677720 |
| 13            | 7             | 0           | -1.986300               | 0.387983  | 1.105275  |
| 14            | 6             | 0           | -1.057460               | -0.252529 | 2.042650  |
| 15            | 1             | 0           | -0.376005               | 0.528573  | 2.395594  |
| 16            | 1             | 0           | -0.420223               | -1.009467 | 1.566191  |
| 17            | 6             | 0           | -2.968492               | -0.455425 | 0.488983  |
| 18            | 6             | 0           | -2.678330               | -1.768612 | 0.088322  |
| 19            | 6             | 0           | -4.289876               | -0.015337 | 0.364980  |
| 20            | 6             | 0           | -3.660878               | -2.591992 | -0.441134 |
| 21            | 1             | 0           | -1.675162               | -2.158937 | 0.194536  |
| 22            | 6             | 0           | -5.280892               | -0.823588 | -0.195698 |

|    |    |   |           |           |           |
|----|----|---|-----------|-----------|-----------|
| 23 | 1  | 0 | -4.554469 | 0.966594  | 0.736480  |
| 24 | 6  | 0 | -4.970224 | -2.122940 | -0.604033 |
| 25 | 1  | 0 | -3.430516 | -3.606768 | -0.743758 |
| 26 | 1  | 0 | -6.287886 | -0.437550 | -0.277974 |
| 27 | 6  | 0 | -1.749481 | -0.859607 | 3.249904  |
| 28 | 6  | 0 | -2.751972 | -0.153669 | 3.924560  |
| 29 | 6  | 0 | -1.357344 | -2.107181 | 3.739862  |
| 30 | 6  | 0 | -3.344472 | -0.684493 | 5.067412  |
| 31 | 1  | 0 | -3.067582 | 0.809232  | 3.538689  |
| 32 | 6  | 0 | -1.946881 | -2.640255 | 4.887068  |
| 33 | 1  | 0 | -0.586160 | -2.667606 | 3.221100  |
| 34 | 6  | 0 | -2.942609 | -1.929967 | 5.553907  |
| 35 | 1  | 0 | -4.120349 | -0.126927 | 5.580652  |
| 36 | 1  | 0 | -1.632475 | -3.611160 | 5.253676  |
| 37 | 1  | 0 | -3.405535 | -2.343283 | 6.442964  |
| 38 | 8  | 0 | -5.858922 | -3.003006 | -1.149450 |
| 39 | 6  | 0 | -7.213454 | -2.584640 | -1.313555 |
| 40 | 1  | 0 | -7.732837 | -3.429721 | -1.761216 |
| 41 | 1  | 0 | -7.675556 | -2.343412 | -0.351195 |
| 42 | 1  | 0 | -7.285812 | -1.719693 | -1.980418 |
| 43 | 6  | 0 | -2.974939 | 3.660165  | 0.688139  |
| 44 | 1  | 0 | -2.149319 | 4.184831  | 1.191353  |
| 45 | 1  | 0 | -3.515458 | 4.394136  | 0.077385  |
| 46 | 8  | 0 | -3.843208 | 3.074579  | 1.638056  |
| 47 | 6  | 0 | -4.441843 | 4.042021  | 2.492529  |
| 48 | 1  | 0 | -5.037417 | 4.762568  | 1.918207  |
| 49 | 1  | 0 | -5.093614 | 3.502535  | 3.178657  |
| 50 | 1  | 0 | -3.683242 | 4.586970  | 3.067847  |
| 51 | 6  | 0 | -1.607418 | -0.426728 | -3.095751 |
| 52 | 6  | 0 | -1.707846 | -1.371491 | -4.096092 |
| 53 | 1  | 0 | -2.277329 | 0.428690  | -3.082789 |
| 54 | 7  | 0 | -0.709106 | -0.490182 | -2.102861 |
| 55 | 6  | 0 | 0.138497  | -1.517299 | -2.121247 |
| 56 | 7  | 0 | 0.152501  | -2.487932 | -3.039536 |
| 57 | 6  | 0 | -0.761917 | -2.420551 | -4.009323 |
| 58 | 8  | 0 | -0.803463 | -3.361617 | -4.943989 |
| 59 | 14 | 0 | 0.265943  | -4.650321 | -5.371258 |
| 60 | 6  | 0 | 0.417035  | -5.869900 | -3.960114 |
| 61 | 1  | 0 | 0.968770  | -5.451655 | -3.117513 |
| 62 | 1  | 0 | -0.569459 | -6.182870 | -3.606707 |
| 63 | 1  | 0 | 0.947075  | -6.763194 | -4.305820 |
| 64 | 6  | 0 | 1.904875  | -3.901638 | -5.881897 |
| 65 | 1  | 0 | 2.602441  | -4.692643 | -6.174126 |
| 66 | 1  | 0 | 1.775575  | -3.234632 | -6.738859 |
| 67 | 1  | 0 | 2.360771  | -3.331132 | -5.070255 |
| 68 | 6  | 0 | -0.622774 | -5.417201 | -6.827823 |
| 69 | 1  | 0 | -1.604012 | -5.800665 | -6.534974 |
| 70 | 1  | 0 | -0.764547 | -4.691254 | -7.632884 |
| 71 | 1  | 0 | -0.040889 | -6.253590 | -7.226921 |
| 72 | 8  | 0 | 1.029080  | -1.536362 | -1.129956 |
| 73 | 14 | 0 | 2.187936  | -2.719353 | -0.637862 |
| 74 | 6  | 0 | 3.431174  | -3.022437 | -2.003555 |
| 75 | 1  | 0 | 3.860143  | -2.080699 | -2.357457 |
| 76 | 1  | 0 | 4.250224  | -3.640003 | -1.621217 |
| 77 | 1  | 0 | 2.984205  | -3.538433 | -2.853805 |
| 78 | 6  | 0 | 2.997898  | -1.875286 | 0.822585  |
| 79 | 1  | 0 | 3.485696  | -0.944613 | 0.519755  |
| 80 | 1  | 0 | 2.269407  | -1.641542 | 1.603300  |
| 81 | 1  | 0 | 3.761083  | -2.526782 | 1.259095  |
| 82 | 6  | 0 | 1.269567  | -4.266239 | -0.118417 |
| 83 | 1  | 0 | 0.691722  | -4.688860 | -0.942591 |
| 84 | 1  | 0 | 1.979030  | -5.026341 | 0.223116  |
| 85 | 1  | 0 | 0.583809  | -4.052609 | 0.706187  |
| 86 | 6  | 0 | -2.723619 | -1.304670 | -5.199100 |
| 87 | 1  | 0 | -3.372928 | -2.184442 | -5.191612 |
| 88 | 1  | 0 | -3.348716 | -0.416487 | -5.092989 |
| 89 | 1  | 0 | -2.240882 | -1.271203 | -6.179597 |
| 90 | 6  | 0 | -0.346738 | 1.395236  | -0.633763 |

**Int-A**

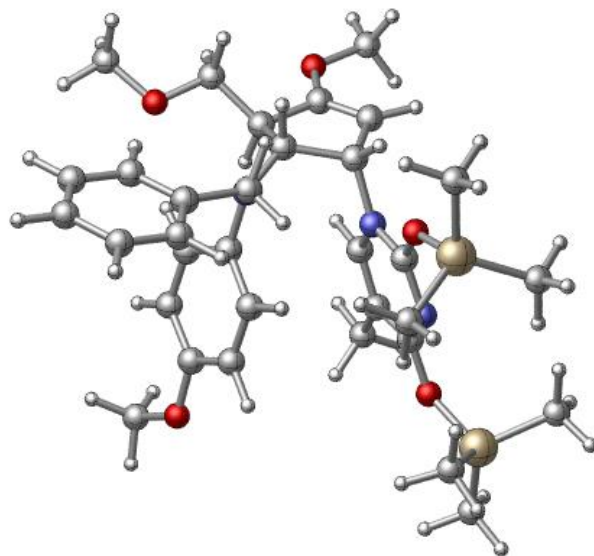


---

| Center Number | Atomic Number | Forces (Hartrees/Bohr) |              |              |
|---------------|---------------|------------------------|--------------|--------------|
|               |               | X                      | Y            | Z            |
| 1             | 6             | -0.001153162           | -0.001139121 | 0.001344147  |
| 2             | 6             | 0.006028966            | 0.007573901  | 0.000098438  |
| 3             | 1             | -0.002123940           | 0.001498354  | 0.000391412  |
| 4             | 1             | 0.001085070            | -0.000386511 | -0.003052399 |
| 5             | 6             | -0.008421827           | -0.003660993 | -0.004066102 |
| 6             | 1             | 0.001635493            | 0.000828768  | 0.001940898  |
| 7             | 6             | 0.001071011            | -0.002923463 | -0.002227148 |
| 8             | 8             | -0.001072179           | 0.002818307  | 0.002512474  |
| 9             | 6             | 0.001530951            | 0.000659771  | -0.001318951 |
| 10            | 1             | 0.000217669            | 0.000100247  | 0.000306618  |
| 11            | 1             | -0.000036133           | 0.000066132  | -0.000022678 |
| 12            | 1             | -0.000505156           | -0.000362607 | -0.000180392 |
| 13            | 7             | -0.003534586           | -0.004374680 | -0.000963584 |
| 14            | 6             | 0.002049598            | -0.001100568 | -0.001052037 |
| 15            | 1             | -0.000384647           | -0.001032297 | -0.001060757 |
| 16            | 1             | -0.002403617           | 0.003584556  | 0.002517826  |
| 17            | 6             | 0.000546110            | -0.004451155 | 0.006195639  |
| 18            | 6             | -0.021903702           | -0.022999832 | 0.039767759  |
| 19            | 6             | -0.004282505           | -0.000592856 | -0.001395540 |
| 20            | 6             | -0.025238690           | -0.021518763 | 0.038951889  |
| 21            | 1             | -0.025289840           | -0.013164409 | 0.024521002  |
| 22            | 6             | -0.002201778           | 0.003979549  | 0.002168594  |
| 23            | 1             | 0.000015141            | 0.000039583  | -0.000413857 |
| 24            | 6             | 0.007330479            | -0.004822708 | 0.006624964  |
| 25            | 1             | -0.003684050           | -0.004255467 | 0.017090088  |
| 26            | 1             | 0.000024911            | 0.000362253  | -0.000370566 |
| 27            | 6             | -0.000030085           | 0.001947995  | -0.000975386 |
| 28            | 6             | -0.000349615           | 0.000364355  | 0.000140024  |
| 29            | 6             | 0.000347876            | -0.001406435 | -0.000700401 |
| 30            | 6             | -0.000760440           | 0.000759735  | 0.000568280  |

---



|    |    |              |              |              |
|----|----|--------------|--------------|--------------|
| 31 | 1  | 0.000113086  | -0.000068968 | 0.000095971  |
| 32 | 6  | -0.000281836 | -0.000730000 | 0.000462101  |
| 33 | 1  | -0.002483065 | 0.000253137  | 0.001633027  |
| 34 | 6  | -0.000506051 | -0.000834592 | 0.000871234  |
| 35 | 1  | -0.000105666 | 0.000150498  | 0.000100222  |
| 36 | 1  | 0.000140157  | -0.000163109 | -0.000005238 |
| 37 | 1  | -0.000129817 | -0.000063459 | 0.000222732  |
| 38 | 8  | 0.001279738  | -0.001419786 | -0.001447114 |
| 39 | 6  | -0.003896827 | 0.000988402  | -0.000317549 |
| 40 | 1  | -0.000146281 | 0.000071010  | 0.000040894  |
| 41 | 1  | 0.000518539  | 0.000125790  | -0.000571528 |
| 42 | 1  | 0.000231126  | -0.000666171 | 0.000240734  |
| 43 | 6  | 0.003717694  | 0.001390317  | -0.001518215 |
| 44 | 1  | -0.000765406 | -0.000992890 | -0.000653900 |
| 45 | 1  | -0.000433318 | -0.000253885 | 0.000245601  |
| 46 | 8  | -0.002324644 | -0.001316457 | 0.001482041  |
| 47 | 6  | 0.000408149  | 0.000365469  | 0.000412799  |
| 48 | 1  | 0.000104668  | 0.000128019  | -0.000076245 |
| 49 | 1  | -0.000137607 | -0.000084351 | 0.000284769  |
| 50 | 1  | -0.000215340 | -0.000040769 | -0.000305988 |
| 51 | 6  | 0.016577150  | 0.020057029  | -0.017995797 |
| 52 | 6  | 0.026014607  | 0.007520421  | -0.040532985 |
| 53 | 1  | 0.001926972  | -0.000906006 | -0.004318121 |
| 54 | 7  | 0.008787993  | 0.014105742  | -0.020045890 |
| 55 | 6  | 0.008178138  | 0.003305314  | -0.004629911 |
| 56 | 7  | 0.004447446  | 0.000524473  | -0.000860844 |
| 57 | 6  | 0.003754844  | 0.013629839  | -0.014483588 |
| 58 | 8  | -0.000872635 | -0.007195511 | -0.002940214 |
| 59 | 14 | 0.000103067  | 0.002390416  | 0.001754677  |
| 60 | 6  | -0.000010613 | -0.001012301 | 0.000475554  |
| 61 | 1  | -0.000160621 | 0.000209516  | -0.000354777 |
| 62 | 1  | -0.000273214 | 0.000552923  | -0.000217980 |
| 63 | 1  | 0.000270938  | 0.000156741  | -0.000622602 |
| 64 | 6  | 0.001102231  | -0.000171509 | -0.001012017 |
| 65 | 1  | -0.000326644 | -0.000438347 | 0.000402442  |
| 66 | 1  | -0.000669961 | 0.000246327  | 0.000233876  |
| 67 | 1  | -0.000419882 | 0.000069061  | 0.000377443  |
| 68 | 6  | -0.001206767 | -0.000944801 | -0.001283851 |
| 69 | 1  | 0.000074329  | 0.000252912  | 0.000577107  |
| 70 | 1  | 0.000235862  | 0.000542000  | 0.000081017  |
| 71 | 1  | 0.000575791  | 0.000110439  | 0.000358602  |
| 72 | 8  | 0.001411782  | 0.000067018  | 0.001731554  |
| 73 | 14 | 0.000016406  | 0.000709319  | -0.001508779 |
| 74 | 6  | 0.000725953  | -0.000334289 | -0.000525556 |
| 75 | 1  | -0.000481592 | 0.000547195  | 0.000209955  |
| 76 | 1  | -0.000313388 | -0.000063976 | 0.000571367  |
| 77 | 1  | -0.000186774 | 0.000059765  | 0.000112946  |
| 78 | 6  | 0.000989509  | 0.000941855  | 0.001171775  |
| 79 | 1  | -0.000542284 | 0.000277700  | -0.000776587 |
| 80 | 1  | -0.000593080 | -0.000107326 | -0.000255708 |
| 81 | 1  | -0.000244145 | -0.000583676 | -0.000283027 |
| 82 | 6  | 0.000875533  | -0.001185925 | 0.001099116  |
| 83 | 1  | -0.000323754 | 0.000287201  | -0.000237072 |
| 84 | 1  | 0.000769209  | 0.000214934  | -0.000581147 |
| 85 | 1  | 0.003832124  | -0.001117711 | -0.001888458 |
| 86 | 6  | 0.002665365  | 0.004778477  | -0.015299072 |
| 87 | 1  | 0.000447898  | 0.008353543  | -0.013861957 |
| 88 | 1  | 0.000380523  | -0.000218550 | -0.000022886 |
| 89 | 1  | 0.002433898  | 0.001880490  | -0.001084445 |
| 90 | 6  | -0.002554219 | 0.004506561  | -0.003664355 |
| 91 | 1  | 0.008987383  | -0.005247135 | 0.011593592  |

---

**TS-B**

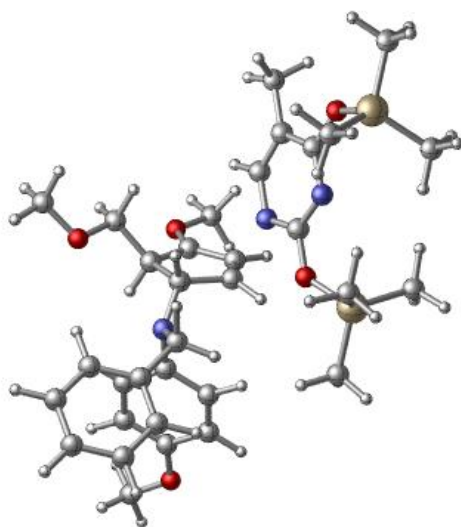

| Center Number | Atomic Number | Atomic Type | Coordinates (Angstroms) |           |           |
|---------------|---------------|-------------|-------------------------|-----------|-----------|
|               |               |             | X                       | Y         | Z         |
| 1             | 6             | 0           | -2.279398               | 2.270690  | 0.138660  |
| 2             | 6             | 0           | -1.484623               | 0.935048  | 0.197203  |
| 3             | 1             | 0           | -3.349237               | 2.048594  | 0.088403  |
| 4             | 1             | 0           | -0.733634               | 1.004587  | 0.985248  |
| 5             | 6             | 0           | -1.050954               | 2.009152  | -1.917620 |
| 6             | 1             | 0           | -0.695239               | 2.185281  | -2.921340 |
| 7             | 6             | 0           | -1.881450               | 2.851113  | -1.185988 |
| 8             | 8             | 0           | -2.361929               | 4.012566  | -1.513105 |
| 9             | 6             | 0           | -1.993893               | 4.611629  | -2.788295 |
| 10            | 1             | 0           | -2.355422               | 3.984610  | -3.602602 |
| 11            | 1             | 0           | -2.489986               | 5.576741  | -2.800877 |
| 12            | 1             | 0           | -0.912358               | 4.734641  | -2.835876 |
| 13            | 7             | 0           | -2.308498               | -0.233499 | 0.509731  |
| 14            | 6             | 0           | -1.578254               | -1.383232 | 1.067376  |
| 15            | 1             | 0           | -0.757476               | -0.977034 | 1.666367  |
| 16            | 1             | 0           | -1.116108               | -2.011242 | 0.294031  |
| 17            | 6             | 0           | -3.372726               | -0.562491 | -0.407543 |
| 18            | 6             | 0           | -3.158388               | -1.287811 | -1.590375 |
| 19            | 6             | 0           | -4.678286               | -0.177795 | -0.101222 |
| 20            | 6             | 0           | -4.210360               | -1.596208 | -2.439107 |
| 21            | 1             | 0           | -2.163037               | -1.630216 | -1.848413 |
| 22            | 6             | 0           | -5.746235               | -0.472096 | -0.950426 |
| 23            | 1             | 0           | -4.863480               | 0.353422  | 0.824894  |
| 24            | 6             | 0           | -5.514090               | -1.184369 | -2.129929 |
| 25            | 1             | 0           | -4.045614               | -2.157520 | -3.351091 |
| 26            | 1             | 0           | -6.741973               | -0.152011 | -0.676445 |
| 27            | 6             | 0           | -2.454320               | -2.247632 | 1.953823  |
| 28            | 6             | 0           | -3.126157               | -1.685174 | 3.045861  |
| 29            | 6             | 0           | -2.582680               | -3.617589 | 1.718530  |
| 30            | 6             | 0           | -3.904327               | -2.477615 | 3.884704  |
| 31            | 1             | 0           | -3.038352               | -0.619920 | 3.228612  |
| 32            | 6             | 0           | -3.361073               | -4.416343 | 2.558108  |
| 33            | 1             | 0           | -2.073331               | -4.065005 | 0.871490  |
| 34            | 6             | 0           | -4.024006               | -3.848225 | 3.643208  |
| 35            | 1             | 0           | -4.417481               | -2.028923 | 4.728273  |

|    |    |   |           |           |           |
|----|----|---|-----------|-----------|-----------|
| 36 | 1  | 0 | -3.451680 | -5.478693 | 2.360434  |
| 37 | 1  | 0 | -4.631044 | -4.465445 | 4.296129  |
| 38 | 8  | 0 | -6.474794 | -1.529204 | -3.030229 |
| 39 | 6  | 0 | -7.825784 | -1.144570 | -2.767454 |
| 40 | 1  | 0 | -8.407142 | -1.514697 | -3.609502 |
| 41 | 1  | 0 | -8.195223 | -1.598271 | -1.842905 |
| 42 | 1  | 0 | -7.924465 | -0.056469 | -2.707681 |
| 43 | 6  | 0 | -2.063304 | 3.228715  | 1.312644  |
| 44 | 1  | 0 | -0.994445 | 3.457790  | 1.433339  |
| 45 | 1  | 0 | -2.589803 | 4.172326  | 1.118701  |
| 46 | 8  | 0 | -2.569546 | 2.604860  | 2.476927  |
| 47 | 6  | 0 | -2.391993 | 3.401425  | 3.641614  |
| 48 | 1  | 0 | -2.914089 | 4.362258  | 3.549471  |
| 49 | 1  | 0 | -2.812556 | 2.844185  | 4.478076  |
| 50 | 1  | 0 | -1.328767 | 3.593073  | 3.834361  |
| 51 | 6  | 0 | -0.763896 | 0.892650  | -1.146653 |
| 52 | 1  | 0 | -0.350252 | -0.022411 | -1.538573 |
| 53 | 6  | 0 | 1.954305  | 2.372116  | -0.323762 |
| 54 | 6  | 0 | 3.278407  | 2.611380  | -0.021647 |
| 55 | 1  | 0 | 1.248101  | 3.195799  | -0.384810 |
| 56 | 7  | 0 | 1.459168  | 1.150477  | -0.561655 |
| 57 | 6  | 0 | 2.311996  | 0.127841  | -0.526812 |
| 58 | 7  | 0 | 3.611331  | 0.229528  | -0.233525 |
| 59 | 6  | 0 | 4.087805  | 1.449776  | 0.024738  |
| 60 | 8  | 0 | 5.367977  | 1.603176  | 0.333646  |
| 61 | 14 | 0 | 6.611725  | 0.465587  | 0.732542  |
| 62 | 6  | 0 | 6.974312  | -0.632174 | -0.738662 |
| 63 | 1  | 0 | 6.142691  | -1.301631 | -0.962178 |
| 64 | 1  | 0 | 7.184446  | -0.033248 | -1.629324 |
| 65 | 1  | 0 | 7.858449  | -1.243118 | -0.530373 |
| 66 | 6  | 0 | 6.070552  | -0.482796 | 2.253738  |
| 67 | 1  | 0 | 6.854166  | -1.186222 | 2.551892  |
| 68 | 1  | 0 | 5.894345  | 0.197647  | 3.091539  |
| 69 | 1  | 0 | 5.155574  | -1.051097 | 2.074936  |
| 70 | 6  | 0 | 8.056257  | 1.595035  | 1.100754  |
| 71 | 1  | 0 | 8.331701  | 2.183612  | 0.221373  |
| 72 | 1  | 0 | 7.823656  | 2.285138  | 1.916118  |
| 73 | 1  | 0 | 8.929276  | 1.005593  | 1.397016  |
| 74 | 8  | 0 | 1.794943  | -1.064389 | -0.810468 |
| 75 | 14 | 0 | 2.566523  | -2.547216 | -1.262064 |
| 76 | 6  | 0 | 3.542292  | -3.234299 | 0.178924  |
| 77 | 1  | 0 | 2.913163  | -3.326227 | 1.068715  |
| 78 | 1  | 0 | 3.913574  | -4.232746 | -0.073108 |
| 79 | 1  | 0 | 4.397550  | -2.604017 | 0.424864  |
| 80 | 6  | 0 | 1.105780  | -3.642473 | -1.667828 |
| 81 | 1  | 0 | 0.475140  | -3.807210 | -0.790403 |
| 82 | 1  | 0 | 0.489187  | -3.207607 | -2.458974 |
| 83 | 1  | 0 | 1.457669  | -4.618978 | -2.014402 |
| 84 | 6  | 0 | 3.613589  | -2.218845 | -2.780308 |
| 85 | 1  | 0 | 4.384140  | -1.468952 | -2.591252 |
| 86 | 1  | 0 | 4.109375  | -3.141542 | -3.097409 |
| 87 | 1  | 0 | 2.991836  | -1.870855 | -3.610071 |
| 88 | 6  | 0 | 3.834938  | 3.978680  | 0.249341  |
| 89 | 1  | 0 | 4.632402  | 4.226414  | -0.456514 |
| 90 | 1  | 0 | 3.054285  | 4.736485  | 0.165530  |
| 91 | 1  | 0 | 4.265546  | 4.036844  | 1.252742  |

---

**Int-B**

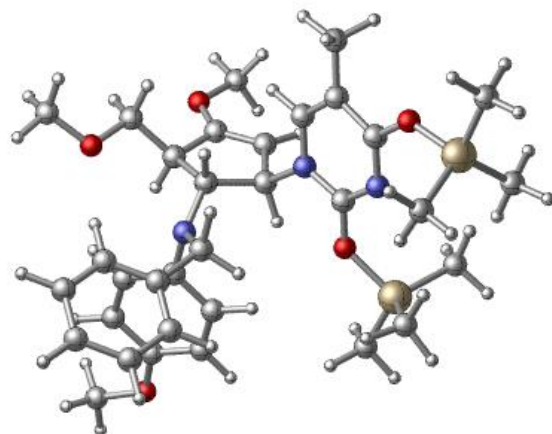

| Center Number | Atomic Number | Atomic Type | Coordinates (Angstroms) |           |           |
|---------------|---------------|-------------|-------------------------|-----------|-----------|
|               |               |             | X                       | Y         | Z         |
| 1             | 6             | 0           | -2.254622               | 2.491534  | -0.308590 |
| 2             | 6             | 0           | -1.240443               | 1.405611  | 0.145547  |
| 3             | 1             | 0           | -3.163423               | 2.008570  | -0.679213 |
| 4             | 1             | 0           | -0.665911               | 1.833865  | 0.974576  |
| 5             | 6             | 0           | -0.464190               | 2.503292  | -1.896867 |
| 6             | 1             | 0           | 0.124413                | 2.741007  | -2.772298 |
| 7             | 6             | 0           | -1.568910               | 3.147702  | -1.479131 |
| 8             | 8             | 0           | -2.164706               | 4.235532  | -1.977512 |
| 9             | 6             | 0           | -1.578008               | 4.843140  | -3.134393 |
| 10            | 1             | 0           | -1.571044               | 4.142077  | -3.973653 |
| 11            | 1             | 0           | -2.203379               | 5.699719  | -3.373224 |
| 12            | 1             | 0           | -0.558358               | 5.175916  | -2.918594 |
| 13            | 7             | 0           | -1.837582               | 0.193012  | 0.659060  |
| 14            | 6             | 0           | -0.983925               | -0.644530 | 1.504165  |
| 15            | 1             | 0           | -0.258411               | 0.024104  | 1.983768  |
| 16            | 1             | 0           | -0.395588               | -1.376678 | 0.927132  |
| 17            | 6             | 0           | -2.811767               | -0.499124 | -0.142381 |
| 18            | 6             | 0           | -2.446952               | -1.470059 | -1.086562 |
| 19            | 6             | 0           | -4.168985               | -0.234807 | 0.040771  |
| 20            | 6             | 0           | -3.404869               | -2.140580 | -1.830381 |
| 21            | 1             | 0           | -1.401447               | -1.716645 | -1.229375 |
| 22            | 6             | 0           | -5.143631               | -0.894091 | -0.708078 |
| 23            | 1             | 0           | -4.457907               | 0.497507  | 0.784716  |
| 24            | 6             | 0           | -4.765214               | -1.855392 | -1.650350 |
| 25            | 1             | 0           | -3.131489               | -2.896084 | -2.557104 |
| 26            | 1             | 0           | -6.186292               | -0.663413 | -0.536868 |
| 27            | 6             | 0           | -1.753200               | -1.378908 | 2.586359  |
| 28            | 6             | 0           | -2.667133               | -0.688040 | 3.388564  |
| 29            | 6             | 0           | -1.534319               | -2.735755 | 2.823335  |
| 30            | 6             | 0           | -3.341545               | -1.345665 | 4.412183  |
| 31            | 1             | 0           | -2.852440               | 0.361691  | 3.188211  |
| 32            | 6             | 0           | -2.208206               | -3.396697 | 3.849988  |
| 33            | 1             | 0           | -0.837179               | -3.285062 | 2.197718  |
| 34            | 6             | 0           | -3.112923               | -2.701954 | 4.647039  |

|    |    |   |           |           |           |
|----|----|---|-----------|-----------|-----------|
| 35 | 1  | 0 | -4.049050 | -0.802524 | 5.028882  |
| 36 | 1  | 0 | -2.032079 | -4.452750 | 4.020497  |
| 37 | 1  | 0 | -3.641604 | -3.213361 | 5.443239  |
| 38 | 8  | 0 | -5.623186 | -2.563755 | -2.427287 |
| 39 | 6  | 0 | -7.023191 | -2.349332 | -2.274512 |
| 40 | 1  | 0 | -7.503411 | -3.022655 | -2.981583 |
| 41 | 1  | 0 | -7.355372 | -2.591824 | -1.259820 |
| 42 | 1  | 0 | -7.297658 | -1.316607 | -2.514294 |
| 43 | 6  | 0 | -2.668350 | 3.490072  | 0.773454  |
| 44 | 1  | 0 | -1.778513 | 3.998407  | 1.184244  |
| 45 | 1  | 0 | -3.306786 | 4.261743  | 0.322999  |
| 46 | 8  | 0 | -3.361650 | 2.808480  | 1.798454  |
| 47 | 6  | 0 | -3.864303 | 3.686182  | 2.794113  |
| 48 | 1  | 0 | -4.563090 | 4.416612  | 2.365972  |
| 49 | 1  | 0 | -4.391197 | 3.074348  | 3.525488  |
| 50 | 1  | 0 | -3.052677 | 4.228086  | 3.298379  |
| 51 | 6  | 0 | -0.233160 | 1.273111  | -1.076786 |
| 52 | 1  | 0 | -0.410680 | 0.355046  | -1.629557 |
| 53 | 6  | 0 | 1.767812  | 2.233053  | 0.032986  |
| 54 | 6  | 0 | 3.042200  | 2.215526  | 0.514060  |
| 55 | 1  | 0 | 1.129021  | 3.101960  | 0.114665  |
| 56 | 7  | 0 | 1.204983  | 1.166094  | -0.610345 |
| 57 | 6  | 0 | 1.971224  | 0.053306  | -0.804519 |
| 58 | 7  | 0 | 3.215546  | -0.035026 | -0.356097 |
| 59 | 6  | 0 | 3.754416  | 0.995708  | 0.300236  |
| 60 | 8  | 0 | 4.969884  | 0.920770  | 0.767372  |
| 61 | 14 | 0 | 6.154384  | -0.367747 | 0.911120  |
| 62 | 6  | 0 | 6.605829  | -0.958490 | -0.803717 |
| 63 | 1  | 0 | 5.783842  | -1.485991 | -1.289971 |
| 64 | 1  | 0 | 6.907905  | -0.124724 | -1.443485 |
| 65 | 1  | 0 | 7.455553  | -1.645937 | -0.742613 |
| 66 | 6  | 0 | 5.393539  | -1.688865 | 1.992687  |
| 67 | 1  | 0 | 6.097786  | -2.516409 | 2.123785  |
| 68 | 1  | 0 | 5.159906  | -1.298264 | 2.986838  |
| 69 | 1  | 0 | 4.476800  | -2.097350 | 1.562790  |
| 70 | 6  | 0 | 7.567182  | 0.516699  | 1.745167  |
| 71 | 1  | 0 | 7.951010  | 1.333527  | 1.128495  |
| 72 | 1  | 0 | 7.265809  | 0.932285  | 2.710035  |
| 73 | 1  | 0 | 8.394044  | -0.176561 | 1.927264  |
| 74 | 8  | 0 | 1.416994  | -0.928436 | -1.459339 |
| 75 | 14 | 0 | 2.116955  | -2.341418 | -2.253835 |
| 76 | 6  | 0 | 2.876501  | -3.452713 | -0.961373 |
| 77 | 1  | 0 | 2.162238  | -3.688859 | -0.167947 |
| 78 | 1  | 0 | 3.174356  | -4.398993 | -1.424403 |
| 79 | 1  | 0 | 3.761777  | -3.007244 | -0.506706 |
| 80 | 6  | 0 | 0.618645  | -3.112968 | -3.049965 |
| 81 | 1  | 0 | -0.088289 | -3.491647 | -2.307710 |
| 82 | 1  | 0 | 0.092244  | -2.407365 | -3.697494 |
| 83 | 1  | 0 | 0.926933  | -3.961269 | -3.669171 |
| 84 | 6  | 0 | 3.335441  | -1.686123 | -3.510431 |
| 85 | 1  | 0 | 4.143558  | -1.117667 | -3.045857 |
| 86 | 1  | 0 | 3.788064  | -2.517912 | -4.059189 |
| 87 | 1  | 0 | 2.839698  | -1.043779 | -4.243478 |
| 88 | 6  | 0 | 3.673142  | 3.377224  | 1.223195  |
| 89 | 1  | 0 | 4.580338  | 3.700104  | 0.707068  |
| 90 | 1  | 0 | 2.985885  | 4.222212  | 1.279418  |
| 91 | 1  | 0 | 3.965495  | 3.099398  | 2.238724  |

---

## Reference

1) Gaussian 09, Revision A.02.

M. J. Frisch, G. W. Trucks, H. B. Schlegel, G. E. Scuseria, M. A. Robb, J. R. Cheeseman, G. Scalmani, V. Barone, B. Mennucci, G. A. Petersson, H. Nakatsuji, M. Caricato, X. Li, H. P. Hratchian, A. F. Izmaylov, J. Bloino, G. Zheng, J. L. Sonnenberg, M. Hada, M. Ehara, K. Toyota, R. Fukuda, J. Hasegawa, M. Ishida, T. Nakajima, Y. Honda, O. Kitao, H. Nakai, T. Vreven, J. A. Montgomery, Jr., J. E. Peralta, F. Ogliaro, M. Bearpark, J. J. Heyd, E. Brothers, K. N. Kudin, V. N. Staroverov, R. Kobayashi, J. Normand, K. Raghavachari, A. Rendell, J. C. Burant, S. S. Iyengar, J. Tomasi, M. Cossi, N. Rega, J. M. Millam, M. Klene, J. E. Knox, J. B. Cross, V. Bakken, C. Adamo, J. Jaramillo, R. Gomperts, R. E. Stratmann, O. Yazyev, A. J. Austin, R. Cammi, C. Pomelli, J. W. Ochterski, R. L. Martin, K. Morokuma, V. G. Zakrzewski, G. A. Voth, P. Salvador, J. J. Dannenberg, S. Dapprich, A. D. Daniels, O. Farkas, J. B. Foresman, J. V. Ortiz, J. Cioslowski, and D. J. Fox, Gaussian, Inc., Wallingford CT, 2009.
